# Supplementary material for: Development of Ewing's Sarcoma from Primary Bone Marrow–Derived Mesenchymal Progenitor Cells
Source: Oxford University Press journal article supplement (doi:10.1158/0008-5472.can-05-1696), 2005-12-15
Supplement: 00085472can051696-sup-supplementary_data_s1.xls [file 00085472can051696-sup-supplementary_data_s1.xls]

## Sheet: st72_up_fdr10
List of induced genes at 72h in hEWS/FLI1V5 expressing STO cells (FDR 10%)
Clone ID	Unigene cluster	Gene symbol	Gene name	t-test p value	FDR
H3083C05	Mm.124328	Sp3	trans-acting transcription factor 3	1.64523e-06	0.0270986
H3044E06	Mm.830	Psme1	proteasome (prosome, macropain) 28 subunit, alpha	1.86229e-06	0.0153369
P598	Mm.1571	Cdh11	cadherin 11	2.42906e-06	0.0133363
H3133F10	Mm.253065	Nr2c2	nuclear receptor subfamily 2, group C, member 2	5.27658e-06	0.0217276
H3015F08	Mm.260635	Axot	axotrophin	5.98052e-06	0.019701
H3141B05	Mm.246688	Ezh2	enhancer of zeste homolog 2 (Drosophila)	1.15231e-05	0.0316328
H3126E05	Mm.26135	Cab39	calcium binding protein 39	1.15487e-05	0.027174
H3025H09	Mm.273930	Vamp3	vesicle-associated membrane protein 3	1.30214e-05	0.0268094
H3037H11	Mm.275191	Tm9sf2	transmembrane 9 superfamily member 2	1.36606e-05	0.0250004
H3052A02	Mm.302604		Mus musculus transcribed sequences	1.41778e-05	0.0233523
H3003F02	Mm.99	Rrm2	ribonucleotide reductase M2	1.95876e-05	0.0293297
H3039F09	Mm.172699		Mus musculus transcribed sequences	2.15153e-05	0.0295316
H3014B09	Mm.294083	Anxa11	annexin A11	2.31271e-05	0.029302
H3102B12	Mm.86406	Fbxl10	F-box and leucine-rich repeat protein 10	2.38146e-05	0.0280179
H3146G01	Mm.925	Tfdp1	transcription factor Dp 1	2.50289e-05	0.0274834
H3081D08	Mm.299471	Rab5a	RAB5A, member RAS oncogene family	2.50627e-05	0.0258005
H3124D06	Mm.86386	Dffb	DNA fragmentation factor, beta subunit	2.65079e-05	0.0256831
H3093H11	Mm.290810	2610304G08Rik	RIKEN cDNA 2610304G08 gene	2.77038e-05	0.0253505
H3139B07	Mm.2115	Hnrpu	heterogeneous nuclear ribonucleoprotein U	2.83307e-05	0.0245598
H3015B09	Mm.183102	Actr3	ARP3 actin-related protein 3 homolog (yeast)	2.92674e-05	0.0241032
H3021B10	Mm.25339	Mta2	metastais-associated gene family, member 2	3.01523e-05	0.0236495
H3052A03	Mm.17853		Mus musculus similar to potassium channel regulator 1 (LOC380959), mRNA	3.31976e-05	0.0248545
H3090F02	Mm.204834	Slc1a3	solute carrier family 1, member 3	3.89977e-05	0.0279275
H3146F03	Mm.28940	Bbx	bobby sox homolog (Drosophila)	3.98013e-05	0.0273153
H3110G08	Mm.24350	H1f0	H1 histone family, member 0	4.11822e-05	0.0271325
H3138B02	Mm.13437	4833420O05Rik	RIKEN cDNA 4833420O05 gene	4.24728e-05	0.0269065
H3009D01	Mm.209750	1110054H05Rik	RIKEN cDNA 1110054H05 gene	4.41081e-05	0.0269076
H3122A01	Mm.76911	1500011D06Rik	RIKEN cDNA 1500011D06 gene	4.47013e-05	0.0262955
H3026F04	Mm.150903	Prkwnk1	protein kinase, lysine deficient 1	4.47578e-05	0.0254209
P279	Mm.248827	Canx	calnexin	4.48506e-05	0.0246245
H3078H05	Mm.27218	Morf4l2	mortality factor 4 like 2	4.49619e-05	0.0238893
H3043A06	Mm.200413	Nsep1	nuclease sensitive element binding protein 1	4.5439e-05	0.0233883
H3062H10	Mm.11829	E330036L07Rik	RIKEN cDNA E330036L07 gene	4.72555e-05	0.0235862
H3137D07	Mm.5831	Abce1	ATP-binding cassette, sub-family E (OABP), member 1	4.78118e-05	0.023162
H3125D02	Mm.295152		Mus musculus transcribed sequences	4.87274e-05	0.0229311
P375	Mm.298212	Mitf	microphthalmia-associated transcription factor	5.02166e-05	0.0229755
H3149F09	Mm.1571	Cdh11	cadherin 11	5.56585e-05	0.0247771
H3051A12	Mm.10153	Twsg1	twisted gastrulation homolog 1 (Drosophila)	5.66176e-05	0.0245407
H3148B05	Mm.87312	Gmfb	glia maturation factor, beta	5.68106e-05	0.023993
H3139E07			EST	5.93941e-05	0.024457
H3046H04	Mm.2654	Wdr1	WD repeat domain 1	5.94243e-05	0.0238726
H3084G07	Mm.12193	MGC6735	Similar to 60S ribosomal protein L30 isolog	6.08011e-05	0.0238442
H3063F04	Mm.244403	LOC212285	hypothetical protein LOC212285	6.28194e-05	0.0240628
H3117H08			EST	6.29791e-05	0.0235756
H3049G02	Mm.9086	Slc16a1	solute carrier family 16 (monocarboxylic acid transporters), member 1	6.33644e-05	0.0231928
P832	Mm.33596	Itga4	integrin alpha 4	6.63965e-05	0.0237743
P879	Mm.21757	Trfr2	transferrin receptor 2	6.98676e-05	0.0244849
H3032B09	Mm.248508	Mesdc2	mesoderm development candiate 2	7.13402e-05	0.0244801
H3079A09	Mm.4189	Ccna2	cyclin A2	7.15962e-05	0.0240665
H3086B07	Mm.284592	AA408656	expressed sequence AA408656	7.34337e-05	0.0241905
H3029E05	Mm.227258	Ilf2	interleukin enhancer binding factor 2	7.50811e-05	0.0242483
H3138F05	Mm.281836	Arf4	ADP-ribosylation factor 4	7.50814e-05	0.023782
H3158D05			EST	7.61054e-05	0.0236515
H3130F10	Mm.279449	Fts	fused toes	7.6587e-05	0.0233605
H3019C08	Mm.279736	Sf3b1	splicing factor 3b, subunit 1	7.86589e-05	0.0235562
P889	Mm.111326	Cdk2	cyclin-dependent kinase 2	7.88639e-05	0.0231959
H3145F04	Mm.16421	Hmgb1	high mobility group box 1	8.00681e-05	0.0231369
H3006H11	Mm.260009	D13Wsu123e	DNA segment, Chr 13, Wayne State University 123, expressed	8.42091e-05	0.0239139
H3126D07	Mm.275340	mSSH-1L	slingshot-like 1	8.49476e-05	0.0237148
H3014G10	Mm.256422	Zfp162	zinc finger protein 162	9.22429e-05	0.0253222
H3104H02	Mm.45645	Sfrs1	splicing factor, arginine/serine-rich 1 (ASF/SF2)	9.56258e-05	0.0258205
H3034H06	Mm.2103	Ccng1	cyclin G1	9.74592e-05	0.0258911
H3020G06	Mm.16421	Hmgb1	high mobility group box 1	9.88685e-05	0.0258486
H3120F09	Mm.248827	Canx	calnexin	0.000102819	0.0264613
H3012C03	Mm.19142	Cappa1	capping protein alpha 1	0.000103202	0.0261514
H3117C08	Mm.254588	Cltc	clathrin, heavy polypeptide (Hc)	0.000103467	0.0258213
H3126C12	Mm.830	Psme1	proteasome (prosome, macropain) 28 subunit, alpha	0.000106445	0.0261679
H3124H07	Mm.270109	Nr2f2	nuclear receptor subfamily 2, group F, member 2	0.000107479	0.0260337
H3045A10	Mm.21964	D11Ertd530e	DNA segment, Chr 11, ERATO Doi 530, expressed	0.000108053	0.0257932
H3065E03	Mm.9925	Idh1	isocitrate dehydrogenase 1 (NADP+), soluble	0.000111446	0.0262232
H3049A01	Mm.28232	2810017C20Rik	RIKEN cDNA 2810017C20 gene	0.000113898	0.0264228
H3100F07	Mm.27836	Tacc3	transforming, acidic coiled-coil containing protein 3	0.000116118	0.0265635
H3115E11	Mm.291554	Prkcl	protein kinase C, lambda	0.000117523	0.0265166
H3127E08			EST	0.000119104	0.0265102
H3087G02	Mm.245500	BC035275	cDNA sequence BC035275	0.000119783	0.0263059
H3009G06	Mm.244912	Papss1	3'-phosphoadenosine 5'-phosphosulfate synthase 1	0.000122592	0.0265686
H3131C03	Mm.280125	Crk	v-crk sarcoma virus CT10 oncogene homolog (avian)	0.000123208	0.0263553
P829	Mm.213474	Zfr	zinc finger RNA binding protein	0.000123304	0.0260376
H3041D08	Mm.29434	Zfp161	zinc finger protein 161	0.000125501	0.0261662
H3132A12	Mm.218851	Eif2s3x	eukaryotic translation initiation factor 2, subunit 3, structural gene X-linked	0.000131344	0.0270422
H3067H08	Mm.292742	2610101N10Rik	RIKEN cDNA 2610101N10 gene	0.000134317	0.0273129
T442	Mm.131130	Casp8	caspase 8	0.000138449	0.0278098
H3120C12			EST	0.000140478	0.0278773
H3118D02	Mm.182931	Paics	phosphoribosylaminoimidazole carboxylase, phosphoribosylaminoribosylaminoimidazole, succinocarboxamide synthetase	0.000143851	0.0282069
H3007F09	Mm.298522	BC010304	cDNA sequence BC010304	0.000146848	0.0284556
H3014D03	Mm.271922	Brms1	breast cancer metastasis-suppressor 1	0.000150504	0.0288249
T435	Mm.57177	Fgf7	fibroblast growth factor 7	0.000151412	0.0286655
T050	Mm.24395	Decr1	2,4-dienoyl CoA reductase 1, mitochondrial	0.000152866	0.028612
H3142H06	Mm.22700	Gtf2h1	general transcription factor II H, polypeptide 1	0.000153786	0.0284607
H3095D01	Mm.209300	Pcyt1a	phosphate cytidylyltransferase 1, choline, alpha isoform	0.000158633	0.0290315
H3112E12	Mm.30059	Marcks	myristoylated alanine rich protein kinase C substrate	0.000159337	0.02884
H3009H04	Mm.4888	Rad50	RAD50 homolog (S. cerevisiae)	0.000164899	0.0295223
H3081B08	Mm.248369	1810054G18Rik	RIKEN cDNA 1810054G18 gene	0.00019157	0.0339285
H3023F09	Mm.296119	Gnpda1	glucosamine-6-phosphate deaminase 1	0.000195434	0.0342447
H3125F09	Mm.288718		Mus musculus adult male cecum cDNA, RIKEN full-length enriched library, clone:9130226F15 product:unknown EST, full insert sequence	0.000198115	0.034349
H3128G04	Mm.9745	Ldh2	lactate dehydrogenase 2, B chain	0.000199104	0.0341608
H3040C09	Mm.259617	Eif3s10	eukaryotic translation initiation factor 3, subunit 10 (theta)	0.000203199	0.034504
H3049G03			EST	0.000203793	0.0342518
H3022G01	Mm.35738	Catns	catenin src	0.000206512	0.0343581
H3114G01	Mm.21163	Sec23ip	Sec23 interacting protein	0.000207672	0.0342057
H3111G05	Mm.21686	D230016N13Rik	RIKEN cDNA D230016N13 gene	0.000209247	0.0341239
H3027F04	Mm.257577	2610040E16Rik	RIKEN cDNA 2610040E16 gene	0.00021087	0.0340514
H3085H04	Mm.205937	2010004P11Rik	RIKEN cDNA 2010004P11 gene	0.000212947	0.0340529
H3106B06	Mm.254134	Gpiap1	GPI-anchored membrane protein 1	0.000215009	0.0340521
H3077G06	Mm.21096	Eral1	Era (G-protein)-like 1 (E. coli)	0.000215098	0.0337418
H3016F01	Mm.272206	Mapkapk5	MAP kinase-activated protein kinase 5	0.000218529	0.0339565
H3025H06			EST	0.000219754	0.0338278
H3008A09	Mm.687	Arhb	ras homolog gene family, member B	0.000219846	0.0335285
H3044C06	Mm.227924	Lpin2	lipin 2	0.000220892	0.033379
H3152H06	Mm.38832	1600019O04Rik	RIKEN cDNA 1600019O04 gene	0.000222848	0.0333684
H3148F10	Mm.12775	Pdk3	pyruvate dehydrogenase kinase, isoenzyme 3	0.000228642	0.0339276
H3022D04	Mm.271178	2610313E07Rik	RIKEN cDNA 2610313E07 gene	0.000239714	0.0352529
H3134G10	Mm.209281	Eif4e	eukaryotic translation initiation factor 4E	0.000240568	0.0350654
H3114H12	Mm.249555	Col3a1	procollagen, type III, alpha 1	0.000242133	0.034984
H3031D02	Mm.169673	AI642036	expressed sequence AI642036	0.000248407	0.0355784
H3149G03	Mm.297562	Nono	non-POU-domain-containing, octamer binding protein	0.000252399	0.0358385
H3011G07	Mm.298110	Eef1a1	eukaryotic translation elongation factor 1 alpha 1	0.000254123	0.0357749
H3060B02	Mm.92314	Osbpl9	oxysterol binding protein-like 9	0.00025524	0.0356277
H3032D03	Mm.221403	Pdgfra	platelet derived growth factor receptor, alpha polypeptide	0.00025578	0.0354029
H3083G09	Mm.24765	Rnf20	ring finger protein 20	0.000262253	0.0359964
H3126F09	Mm.172062		Mus musculus transcribed sequences	0.000264211	0.0359655
H3151A12	Mm.78861	Nolc1	nucleolar and coiled-body phosphoprotein 1	0.000264236	0.035674
H3007D02	Mm.2344	Gnb1	guanine nucleotide binding protein, beta 1	0.000265851	0.0356003
H3116A02	Mm.26412	Smc1l1	SMC (structural maintenance of chromosomes 1)-like 1 (S. cerevisiae)	0.000272527	0.0361999
H3144C10			EST	0.000274515	0.0361724
H3156B03	Mm.29742	Sesn1	sestrin 1	0.000276772	0.0361803
H3115H12	Mm.132634		Mus musculus 2 days neonate thymus thymic cells cDNA, RIKEN full-length enriched library, clone:E430005K05 product:TRANSLOCON-ASSOCIATED PROTEIN, ALPHA SUBUNIT PRECURSOR (TRAP-ALPHA) (SIGNAL SEQUENCE RECEPTOR ALPHA SUBUNIT) (SSR-ALPHA) homolog [Homo ...	0.000277598	0.0360024
H3005F11	Mm.200859	Pafah1b2	platelet-activating factor acetylhydrolase, isoform 1b, alpha2 subunit	0.000278425	0.0358277
H3128G09	Mm.36569	Usp8	ubiquitin specific protease 8	0.000284432	0.036317
H3021G10	Mm.29666	Slc25a20	solute carrier family 25 (mitochondrial carnitine/acylcarnitine translocase), member 20	0.000284623	0.0360617
H3052B02			EST	0.000285957	0.0359541
H3085F12	Mm.260626	Capza2	capping protein (actin filament) muscle Z-line, alpha 2	0.000288356	0.0359812
H3072B08	Mm.245500	BC035275	cDNA sequence BC035275	0.000288756	0.0357602
H3118A08	Mm.11075	2610005B21Rik	RIKEN cDNA 2610005B21 gene	0.000290501	0.0357078
H3102G09	Mm.124589	Wrn	Werner syndrome homolog (human)	0.000301023	0.036727
H3091G06	Mm.27223	C230060M08Rik	RIKEN cDNA C230060M08 gene	0.000310723	0.0376318
T452	Mm.298220	Nes	nestin	0.000318389	0.0382787
H3124A02	Mm.3063	Ptn	pleiotrophin	0.000318682	0.0380363
H3135H11	Mm.196239	1010001H21Rik	RIKEN cDNA 1010001H21 gene	0.000326121	0.0386441
H3141H05			EST	0.000328248	0.0386184
H3083A08	Mm.102638	1700069O15Rik	RIKEN cDNA 1700069O15 gene	0.000330526	0.0386106
H3136G10	Mm.228433	Slc12a2	solute carrier family 12, member 2	0.0003388	0.0392984
H3124B06	Mm.103583	Mc7	brain cDNA 7	0.00034146	0.03933
P352	Mm.3868	Yy1	YY1 transcription factor	0.000342095	0.0391295
H3149B12	Mm.7723	Pabpn1	poly(A) binding protein, nuclear 1	0.000342972	0.0389592
H3082A01	Mm.132208	Ipo11	importin 11	0.000344548	0.0388702
H3011D01			EST	0.000345239	0.0386832
H3012D04	Mm.122366	4833420I20Rik	RIKEN cDNA 4833420I20 gene	0.000345577	0.0384595
H3026E06			EST	0.000346199	0.0382701
H3131G09	Mm.259653	Rasa1	RAS p21 protein activator 1	0.000348552	0.0382734
H3026D01	Mm.33324		Mus musculus adult retina cDNA, RIKEN full-length enriched library, clone:A930001C09 product:TAIL FIBROBLAST RECEPTOR FOR FELINE LEUKEMIA VIRUS SUBGROUP C homolog [Mus dunni], full insert sequence	0.000348554	0.03802
H3130B02	Mm.209281	Eif4e	eukaryotic translation initiation factor 4E	0.000351513	0.0380906
H3091G11	Mm.27836	Tacc3	transforming, acidic coiled-coil containing protein 3	0.000353726	0.0380799
H3136G12	Mm.24350	H1f0	H1 histone family, member 0	0.000354709	0.0379377
H3112D06	Mm.180338	2610027L16Rik	RIKEN cDNA 2610027L16 gene	0.000357516	0.0379913
H3142H09	Mm.210413	Epb4.1l2	erythrocyte protein band 4.1-like 2	0.000362966	0.0383231
H3018H04	Mm.38233	Ptk9	protein tyrosine kinase 9	0.000370881	0.0389094
H3087D05	Mm.87611	Cul1	cullin 1	0.000373591	0.0389457
H3011F08	Mm.249333	1300002F13Rik	RIKEN cDNA 1300002F13 gene	0.000380249	0.0393904
H3128H07	Mm.127617	D17Ertd441e	DNA segment, Chr 17, ERATO Doi 441, expressed	0.000392739	0.04043
H3068G07	Mm.34775	Pdha1	pyruvate dehydrogenase E1 alpha 1	0.000396943	0.040609
H3084C11			EST	0.000397617	0.0404269
H3081C04	Mm.27120	LOC228071	hypothetical protein LOC228071	0.000399447	0.0403637
H3009H07	Mm.268053	6530402N02Rik	RIKEN cDNA 6530402N02 gene	0.000404535	0.0406287
H3004D02	Mm.22724	Plaa	phospholipase A2, activating protein	0.000407591	0.0406874
H3138C05	Mm.273152	Psmd8	proteasome (prosome, macropain) 26S subunit, non-ATPase, 8	0.000409362	0.0406181
H3086H04	Mm.245566	Crsp2	cofactor required for Sp1 transcriptional activation subunit 2	0.000411024	0.0405388
H3085H08	Mm.254530	6530403D07Rik	RIKEN cDNA 6530403D07 gene	0.000412015	0.0403946
H3117A02	Mm.87389	4930459M12Rik	RIKEN cDNA 4930459M12 gene	0.000412568	0.0402095
H3030F07	Mm.261735	Copb2	coatomer protein complex, subunit beta 2 (beta prime)	0.000415557	0.0402626
H3018A02	Mm.276595		Mus musculus transcribed sequence with moderate similarity to protein ref:NP_003770.1 (H.sapiens) UDP-Gal:betaGlcNAc beta 1,4- galactosyltransferase 3; beta-N-acetylglucosaminyl-glycopeptide beta-1,4-galactosyltransferase; glycoprotein 4-beta-galactosyltransferase; UDP-galactose-glycoprotein galactosyltransferase; beta-1,4-GalTase 3; UDP-galactose:beta-N-acetylglucosamine beta-1,4-galactosyltrans…	0.000416297	0.0400984
H3116C09	Mm.255488	Pcdh7	protocadherin 7	0.000422504	0.0404597
H3087F06	Mm.281149	BC006933	cDNA sequence BC006933	0.000423937	0.0403622
H3046B09	Mm.223946	2610019N13Rik	RIKEN cDNA 2610019N13 gene	0.000425438	0.0402723
H3020A11	Mm.278922	D3Ertd330e	DNA segment, Chr 3, ERATO Doi 330, expressed	0.000427594	0.0402452
H3113H08	Mm.12665	Cul3	cullin 3	0.000432444	0.0404704
H3042A11	Mm.280656	Usp1	ubiquitin specific protease 1	0.000440206	0.0409641
T453	Mm.68933	Mapk9	mitogen activated protein kinase 9	0.000442043	0.0409039
H3007G03	Mm.251013	Kpnb1	karyopherin (importin) beta 1	0.000442497	0.0407171
H3031E05	Mm.291928	Catnb	catenin beta	0.00044435	0.0406605
H3122E01	Mm.21145	Amotl2	angiomotin like 2	0.000445805	0.0405683
H3056D03	Mm.275555	Cnn3	calponin 3, acidic	0.000453136	0.0410088
H3031B07	Mm.10153	Twsg1	twisted gastrulation homolog 1 (Drosophila)	0.000453643	0.0408304
H3044F06	Mm.234179	0710007A14Rik	RIKEN cDNA 0710007A14 gene	0.000459456	0.0411288
H3011A05			EST	0.000462156	0.0411468
H3131E10	Mm.321393		Mus musculus transcribed sequences	0.000463456	0.0410407
H3025F05	Mm.260601	C530050O22Rik	RIKEN cDNA C530050O22 gene	0.000466232	0.0410658
H3152G03	Mm.279898	2610028L19Rik	RIKEN cDNA 2610028L19 gene	0.000474405	0.0415634
H3044A03	Mm.20904	Crtap	cartilage associated protein	0.000477706	0.0416312
H3073H04	Mm.250022		Mus musculus transcribed sequence with weak similarity to protein ref:NP_081764.1 (M.musculus) RIKEN cDNA 5730493B19 [Mus musculus]	0.000484351	0.0419882
H3031D05	Mm.295612	Copg	coatomer protein complex, subunit gamma	0.000485311	0.0418511
H3159B03	Mm.5264	Fez1	fasciculation and elongation protein zeta 1 (zygin I)	0.000486271	0.0417155
H3031D10	Mm.200413	Nsep1	nuclease sensitive element binding protein 1	0.000491076	0.0419094
H3031G03	Mm.260335	Pknox2	Pbx/knotted 1 homeobox 2	0.000502892	0.0426965
H3154F07	Mm.87389	4930459M12Rik	RIKEN cDNA 4930459M12 gene	0.000507686	0.0428826
H3108H02	Mm.167131	Sh3kbp1	SH3-domain kinase binding protein 1	0.000521572	0.0438307
H3017B01	Mm.25429	Nrf1	nuclear respiratory factor 1	0.000523098	0.0437358
H3149H12	Mm.3868	Yy1	YY1 transcription factor	0.000525793	0.0437391
H3092C01	Mm.185453	Eif4g2	eukaryotic translation initiation factor 4, gamma 2	0.000531191	0.0439661
H3127B12			EST	0.000536517	0.0441849
P738	Mm.261818	Pfn1	profilin 1	0.000536645	0.0439756
H3024A11	Mm.99	Rrm2	ribonucleotide reductase M2	0.000537946	0.0438639
H3093D09	Mm.246435	Tomm22	translocase of outer mitochondrial membrane 22 homolog (yeast)	0.000543456	0.0440949
H3133F08	Mm.218959	BC031601	cDNA sequence BC031601	0.0005458	0.044068
H3064F09	Mm.21482	Clns1a	chloride channel, nucleotide-sensitive, 1A	0.000552206	0.0443677
H3118B10	Mm.259191	Ogt	O-linked N-acetylglucosamine (GlcNAc) transferase (UDP-N-acetylglucosamine:polypeptide-N-acetylglucosaminyl transferase)	0.000552793	0.0441993
H3078F02	Mm.34102	Odc	ornithine decarboxylase, structural	0.000555113	0.0441704
H3143G08	Mm.142872	Hnrpk	heterogeneous nuclear ribonucleoprotein K	0.000572879	0.0453649
P818	Mm.223978	Cutl1	cut-like 1 (Drosophila)	0.000578311	0.0455759
H3051F12	Mm.279872	Prpf3	PRP3 pre-mRNA processing factor 3 homolog (yeast)	0.000585483	0.0459214
H3078B12			EST	0.00058739	0.0458526
H3158H02	Mm.35064	Elmo2	engulfment and cell motility 2, ced-12 homolog (C. elegans)	0.000588186	0.0456982
H3032B11	Mm.320044	0610007P08Rik	RIKEN cDNA 0610007P08 gene	0.000590111	0.0456325
H3113D10	Mm.28765	Tram1	translocating chain-associating membrane protein 1	0.000591453	0.0455226
H3104E03	Mm.29933	2410003B16Rik	RIKEN cDNA 2410003B16 gene	0.000596418	0.0456912
H3020E01	Mm.270681	Hsp105	heat shock protein 105	0.000599943	0.0457484
H3130H06	Mm.14802	H19	H19 fetal liver mRNA	0.000603594	0.0458148
H3115B10	Mm.285454	Spop	speckle-type POZ protein	0.000603687	0.0456116
H3013F04	Mm.181721	2610041P16Rik	RIKEN cDNA 2610041P16 gene	0.000614085	0.0461853
H3014H04	Mm.284984	Ywhag	3-monooxgenase/tryptophan 5-monooxgenase activation protein, gamma polypeptide	0.000614722	0.0460231
H3010F04	Mm.297138	Rbm3	RNA binding motif protein 3	0.000624314	0.0465297
H3129B10	Mm.208855	AW551984	expressed sequence AW551984	0.000630823	0.0468031
H3118H01			EST	0.000638813	0.0471833
H3110H11	Mm.80565	Ppp3ca	protein phosphatase 3, catalytic subunit, alpha isoform	0.000642118	0.0472157
H3134E12	Mm.270703	Cast1	O-acetyltransferase	0.000646168	0.0473024
H3064D07	Mm.313443		Mus musculus transcribed sequences	0.000650405	0.0474019
H3027D07	Mm.324697	Hmgb1	high mobility group box 1	0.000650905	0.0472293
H3038C09	Mm.296888		Mus musculus similar to phosphoribosyl pyrophosphate synthetase-associated protein 2 (LOC228072), mRNA	0.000655066	0.0473228
H3108H08	Mm.29941		Mus musculus 13 days embryo lung cDNA, RIKEN full-length enriched library, clone:D430041M12 product:unknown EST, full insert sequence	0.000656013	0.0471842
T204	Mm.28278	Cav	caveolin, caveolae protein	0.000668189	0.047851
H3141H02	Mm.260943	A030003E17Rik	RIKEN cDNA A030003E17 gene	0.000671852	0.0479051
H3123D04	Mm.35407	Frk	fyn-related kinase	0.000685233	0.0486486
H3078D07	Mm.12246	Ier5	immediate early response 5	0.000687704	0.0486145
H3126G10	Mm.23296	E2f6	E2F transcription factor 6	0.000694365	0.0488756
H3054A03	Mm.272568	D5Ertd249e	DNA segment, Chr 5, ERATO Doi 249, expressed	0.00069603	0.0487843
T212	Mm.9221	Rab4a	RAB4A, member RAS oncogene family	0.000697821	0.0487026
H3042F12	Mm.3093	Serpine2	serine (or cysteine) proteinase inhibitor, clade E, member 2	0.000698946	0.0485752
H3083D06	Mm.688	Bag1	Bcl2-associated athanogene 1	0.000703884	0.0487129
H3074A03	Mm.283734	Nek7	NIMA (never in mitosis gene a)-related expressed kinase 7	0.000706767	0.0487077
H3022F01	Mm.293517	Sdf4	stromal cell derived factor 4	0.000712779	0.0489174
H3058H08	Mm.127156	Pros1	protein S (alpha)	0.000713456	0.0487607
H3003E09	Mm.292021	4921532K09Rik	RIKEN cDNA 4921532K09 gene	0.000717877	0.0488601
H3138A01			EST	0.000718891	0.0487278
H3021A07	Mm.218891	Catnal1	catenin alpha-like 1	0.000720658	0.0486474
H3116B03	Mm.277408	Mcpr	meiotic check point regulator	0.000727374	0.0489003
H3146D06	Mm.5348	Phf7	PHD finger protein 7	0.000732221	0.0490261
H3085H10	Mm.28957	Peli1	pellino 1	0.00073485	0.0490029
H3116F09	Mm.234700	Ywhae	tyrosine 3-monooxygenase/tryptophan 5-monooxygenase activation protein, epsilon polypeptide	0.000744635	0.0494551
H3148E09	Mm.33832	Slc14a1	solute carrier family 14 (urea transprorter), member 1	0.000756396	0.0500345
H3018D06	Mm.242646	Usp9x	ubiquitin specific protease 9, X chromosome	0.000758026	0.0499418
H3126D11	Mm.28424	LOC228790	additional sex combs like 1	0.000760205	0.0498858
P185	Mm.26587	Nr1d2	nuclear receptor subfamily 1, group D, member 2	0.000764062	0.0499399
H3069A07	Mm.22670	Mdm2	transformed mouse 3T3 cell double minute 2	0.000767153	0.0499438
H3030B08	Mm.244236	6030436C20Rik	RIKEN cDNA 6030436C20 gene	0.00077828	0.0504687
H3060A11	Mm.7331	Pbx3	pre B-cell leukemia transcription factor 3	0.000780003	0.0503821
H3012H03	Mm.244229	2410008G02Rik	RIKEN cDNA 2410008G02 gene	0.000788831	0.0507533
H3137E02	Mm.21669	Ndufs2	NADH dehydrogenase (ubiquinone) Fe-S protein 2	0.000789111	0.0505737
H3093B05	Mm.291542	1700009P03Rik	RIKEN cDNA 1700009P03 gene	0.000790629	0.0504746
H3146E04	Mm.260176	2610028H07Rik	RIKEN cDNA 2610028H07 gene	0.000791253	0.0503194
H3020E03	Mm.28221	AW544865	expressed sequence AW544865	0.000792459	0.0502023
T073	Mm.209300	Pcyt1a	phosphate cytidylyltransferase 1, choline, alpha isoform	0.000803418	0.0507015
H3009A01	Mm.292001	2610031L17Rik	RIKEN cDNA 2610031L17 gene	0.000804028	0.0505464
H3138D11	Mm.310471		Mus musculus transcribed sequences	0.000804342	0.0503739
H3127C09	Mm.271997	Appbp2	amyloid beta precursor protein (cytoplasmic tail) binding protein 2	0.000810505	0.0505676
H3030F09	Mm.274432	Ppp3cb	protein phosphatase 3, catalytic subunit, beta isoform	0.000814714	0.0506383
H3012E08	Mm.34701	Pum1	pumilio 1 (Drosophila)	0.000823282	0.0509785
H3049H03	Mm.11311	2310057D15Rik	RIKEN cDNA 2310057D15 gene	0.000838068	0.0516997
H3111F07			EST	0.000838763	0.0515495
H3035H09	Mm.64579	2810036L13Rik	RIKEN cDNA 2810036L13 gene	0.00084919	0.0519963
H3153H08	Mm.252561	Hs6st2	heparan sulfate 6-O-sulfotransferase 2	0.000862335	0.0526056
H3025B05	Mm.262330	Stk3	serine/threonine kinase 3 (Ste20, yeast homolog)	0.000871025	0.0529397
H3155A02	Mm.257971		Mus musculus, Similar to pyruvate dehydrogenase phosphatase, clone IMAGE:6492665, mRNA	0.000874313	0.0529442
H3066A03	Mm.27371		Mus musculus 13 days embryo head cDNA, RIKEN full-length enriched library, clone:3110031A07 product:DNA segment, Chr 5, ERATO Doi 591, expressed, full insert sequence	0.00087948	0.053062
H3116B09	Mm.277408	Mcpr	meiotic check point regulator	0.000879932	0.0528954
H3116A05	Mm.268668	Melk	maternal embryonic leucine zipper kinase	0.000891579	0.0534007
H3093H10	Mm.26079		Mus musculus similar to ALY (LOC327811), mRNA	0.000901951	0.0538262
H3085C05	Mm.27652		Mus musculus similar to 2-cell-stage, variable group, member 3; 2-cell-stage, variable group, member 1 (LOC236374), mRNA	0.00090365	0.0537329
P280	Mm.260626	Capza2	capping protein (actin filament) muscle Z-line, alpha 2	0.000907299	0.0537558
H3028F05	Mm.34102	Odc	ornithine decarboxylase, structural	0.000907925	0.0536001
H3019F08	Mm.158801	Rod1	ROD1 regulator of differentiation 1 (S. pombe)	0.000914296	0.0537835
H3014D09	Mm.297562	Nono	non-POU-domain-containing, octamer binding protein	0.000925851	0.0542693
H3140F07	Mm.298110	Eef1a1	eukaryotic translation elongation factor 1 alpha 1	0.000927364	0.0541653
H3031A10	Mm.295124		Mus musculus 7 days embryo whole body cDNA, RIKEN full-length enriched library, clone:C430002D13 product:TROPOMYOSIN 4 homolog [Homo sapiens], full insert sequence	0.000928466	0.0540381
H3147C02	Mm.194811	Uqcrc1	ubiquinol-cytochrome c reductase core protein 1	0.000934559	0.0542012
H3002H04	Mm.258094	B3gnt1	UDP-GlcNAc:betaGal beta-1,3-N-acetylglucosaminyltransferase 1	0.000938988	0.0542669
P051	Mm.298108	Cdkap1	CDK2 (cyclin-dependent kinase 2)-associated protein 1	0.00094578	0.0544683
H3069A06	Mm.27836	Tacc3	transforming, acidic coiled-coil containing protein 3	0.000966745	0.0554817
H3030H01	Mm.247456	Nfx1	nuclear transcription factor, X-box binding 1	0.000969698	0.0554579
H3151G05	Mm.256368	5830462I21Rik	RIKEN cDNA 5830462I21 gene	0.000976838	0.055673
H3128B05	Mm.270511	Tcerg1	transcription elongation regulator 1 (CA150)	0.000981656	0.0557547
H3148A12	Mm.89568	B930060C03	hypothetical protein B930060C03	0.000994064	0.0562654
P003	Mm.286892	Col4a5	procollagen, type IV, alpha 5	0.000996038	0.0561841
H3013B11	Mm.131150	Dek	DEK oncogene (DNA binding)	0.000998828	0.0561491
H3005D08	Mm.18834	2310058A11Rik	RIKEN cDNA 2310058A11 gene	0.00100179	0.0561238
H3153G04	Mm.278760	BC026585	cDNA sequence BC026585	0.00100743	0.0562489
H3136E05	Mm.2185	Bub1	budding uninhibited by benzimidazoles 1 homolog (S. cerevisiae)	0.00100771	0.0560745
H3119A03	Mm.196110	Hba-a1	hemoglobin alpha, adult chain 1	0.00101821	0.0564678
H3119C04	Mm.22448	Ckap2	cytoskeleton associated protein 2	0.00102344	0.0565675
H3115D06	Mm.271765	AI450344	expressed sequence AI450344	0.00103121	0.0568061
H3092C12			EST	0.00103279	0.0567038
H3158H03	Mm.213292	D16Wsu109e	DNA segment, Chr 16, Wayne State University 109, expressed	0.00104427	0.0571434
H3152F02	Mm.273217	Polr2b	polymerase (RNA) II (DNA directed) polypeptide B	0.00105985	0.0578042
H3119F02	Mm.133919	Tcfl1	transcription factor-like 1	0.0010635	0.0578113
H3027D02	Mm.218889	1110001C20Rik	RIKEN cDNA 1110001C20 gene	0.00106958	0.057951
H3091E09	Mm.297348		Mus musculus similar to Eukaryotic translation initiation factor 1A (eIF-1A) (eIF-4C) (LOC236359), mRNA	0.00107111	0.0578432
H3123A10	Mm.296794		Mus musculus 10 days neonate skin cDNA, RIKEN full-length enriched library, clone:4732479L14 product:unknown EST, full insert sequence	0.00109491	0.0589353
H3008B03	Mm.258805	Ube2r2	ubiquitin-conjugating enzyme E2R 2	0.00109544	0.0587718
H3092E07	Mm.274904	1700003F10Rik	RIKEN cDNA 1700003F10 gene	0.00109704	0.0586664
H3058D05	Mm.276155	Ihpk1	inositol hexaphosphate kinase 1	0.00110567	0.058937
H3157F09	Mm.253836	Dido1	death inducer-obliterator 1	0.00110668	0.0588006
H3129G02	Mm.240336	Sptlc1	serine palmitoyltransferase, long chain base subunit 1	0.00110902	0.058735
H3022H07	Mm.251548	Topors	topoisomerase I binding, arginine/serine-rich	0.00111652	0.058943
T071	Mm.225505	Chk	choline kinase	0.00111835	0.0588511
H3124H10	Mm.249555	Col3a1	procollagen, type III, alpha 1	0.0011257	0.059049
H3030C08	Mm.241109	Rsn	restin (Reed-Steinberg cell-expressed intermediate filament-associated protein)	0.00112587	0.0588706
H3128B07			EST	0.00113114	0.0589591
H3032C10	Mm.260207	Hmgcr	3-hydroxy-3-methylglutaryl-Coenzyme A reductase	0.00113299	0.0588692
H3139D07	Mm.298110	Eef1a1	eukaryotic translation elongation factor 1 alpha 1	0.00114106	0.059102
H3055C10	Mm.21583	AI462438	expressed sequence AI462438	0.00115127	0.0594436
H3083D02	Mm.4189	Ccna2	cyclin A2	0.00115658	0.0595314
H3015D09			EST	0.00115899	0.0594696
H3111C08	Mm.19130	Elovl5	ELOVL family member 5, elongation of long chain fatty acids (yeast)	0.00115974	0.0593234
H3086E07	Mm.43358	Pbx1	pre B-cell leukemia transcription factor 1	0.00116091	0.059199
H3153C02	Mm.260647		Mus musculus adult male spinal cord cDNA, RIKEN full-length enriched library, clone:A330049K02 product:SIMILAR TO CONSERVED MEMBRANE PROTEIN AT 44E homolog [Mus musculus], full insert sequence	0.00116483	0.0592159
H3115G08	Mm.29257	6530405F15Rik	RIKEN cDNA 6530405F15 gene	0.0011652	0.0590524
H3101A01	Mm.290857	Lman1	lectin, mannose-binding, 1	0.00116672	0.0589478
H3026F01	Mm.254588	Cltc	clathrin, heavy polypeptide (Hc)	0.00116758	0.0588111
H3139B03	Mm.37551	1110001J12Rik	RIKEN cDNA 1110001J12 gene	0.00118425	0.0594688
P243			EST	0.00119081	0.0596168
H3008G09	Mm.45418	2700094F01Rik	RIKEN cDNA 2700094F01 gene	0.00119516	0.0596528
H3130B03	Mm.120475	4930556B16Rik	RIKEN cDNA 4930556B16 gene	0.00119542	0.0594857
H3147B05	Mm.289929	2610203K23Rik	RIKEN cDNA 2610203K23 gene	0.00120947	0.0600033
H3077B09	Mm.86406	Fbxl10	F-box and leucine-rich repeat protein 10	0.00121776	0.0602332
H3124E03	Mm.116770	LOC192976	hypothetical protein LOC192976	0.00121861	0.060095
H3014B03	Mm.86382	6430573D20Rik	RIKEN cDNA 6430573D20 gene	0.00121918	0.0599436
H3020H07	Mm.205830	Gdi1	guanosine diphosphate (GDP) dissociation inhibitor 1	0.00122099	0.0598542
H3126G12			EST	0.00122227	0.0597388
P677	Mm.289681	Dtr	diphtheria toxin receptor	0.00122568	0.0597284
H3044B01	Mm.296985	Cct4	chaperonin subunit 4 (delta)	0.00123355	0.0599347
H3125A01	Mm.211535	2810002E22Rik	RIKEN cDNA 2810002E22 gene	0.00123452	0.0598052
H3078F09	Mm.280075	Dp1	deleted in polyposis 1	0.00123672	0.0597363
H3014D01	Mm.254588	Cltc	clathrin, heavy polypeptide (Hc)	0.00125164	0.0602801
H3048A01	Mm.46847	4930469P12Rik	RIKEN cDNA 4930469P12 gene	0.00125381	0.0602085
H3136A11			EST	0.00126035	0.0603464
H3083B01	Mm.276382	Ube4b	ubiquitination factor E4B, UFD2 homolog (S. cerevisiae)	0.00126284	0.0602907
H3119F01	Mm.30251	Mcfd2	multiple coagulation factor deficiency 2	0.00126296	0.0601221
P681	Mm.16421	Hmgb1	high mobility group box 1	0.00126329	0.0599644
H3119H02			EST	0.00128144	0.0606513
H3151E11	Mm.86595	Shc1	src homology 2 domain-containing transforming protein C1	0.00128308	0.0605546
H3055E05	Mm.50424	AI591476	expressed sequence AI591476	0.00129766	0.0610678
H3023G03	Mm.21848	Bzw1	basic leucine zipper and W2 domains 1	0.0012978	0.0609002
H3126A05	Mm.16421	Hmgb1	high mobility group box 1	0.00130532	0.0610792
H3135G05	Mm.33376	Shoc2	soc-2 (suppressor of clear) homolog (C. elegans)	0.00131053	0.0611492
H3019G10	Mm.262659	1200015F23Rik	RIKEN cDNA 1200015F23 gene	0.00131095	0.060996
H3039A10			EST	0.00131165	0.060857
H3141H11	Mm.60331	Amhr2	anti-Mullerian hormone type 2 receptor	0.00131599	0.0608869
P078	Mm.280068	Chc1l	chromosome condensation 1-like	0.00132912	0.0613218
H3019B04	Mm.29803	Aldh9a1	aldehyde dehydrogenase 9, subfamily A1	0.00133327	0.0613416
H3143F08	Mm.294930		Mus musculus similar to mKIAA0284 protein (LOC380790), mRNA	0.00133424	0.0612151
H3122D03	Mm.40268	Pdgfc	platelet-derived growth factor, C polypeptide	0.00133956	0.0612886
H3134D01			EST	0.00134071	0.0611714
H3123G03	Mm.69919	2310012P17Rik	RIKEN cDNA 2310012P17 gene	0.00134595	0.0612405
H3147B09	Mm.207766	A330063D19Rik	RIKEN cDNA A330063D19 gene	0.00134725	0.0611311
H3085B01	Mm.26908	Csnk1a1	casein kinase 1, alpha 1	0.00135192	0.0611745
H3147B11	Mm.245890	Spred1	sprouty protein with EVH-1 domain 1, related sequence	0.00137688	0.0621332
P882	Mm.12665	Cul3	cullin 3	0.00138195	0.0621915
H3042B05	Mm.271178	2610313E07Rik	RIKEN cDNA 2610313E07 gene	0.0013858	0.0621947
H3105F11	Mm.27239	Vil	villin	0.00138649	0.0620569
H3159G05	Mm.272792	Gstm2	glutathione S-transferase, mu 2	0.00140144	0.0625559
T466	Mm.260227	Pak1	p21 (CDKN1A)-activated kinase 1	0.00140321	0.0624654
H3025E04	Mm.4691	Nid1	nidogen 1	0.00140595	0.0624187
H3049B07	Mm.270681	Hsp105	heat shock protein 105	0.00142057	0.0628985
T082	Mm.276039	Ppap2a	phosphatidic acid phosphatase 2a	0.00142564	0.0629537
H3047B05	Mm.276381	Tnpo3	transportin 3	0.001429	0.0629334
H3079C05	Mm.202725	Ddx46	DEAD (Asp-Glu-Ala-Asp) box polypeptide 46	0.00143496	0.0630273
H3146B08	Mm.26700	AU040576	expressed sequence AU040576	0.00143674	0.0629376
H3075A10	Mm.173953	Smc6l1	SMC6 structural maintenance of chromosomes 6-like 1 (yeast)	0.00144688	0.0632136
H3123C06	Mm.274376	Rdh10	retinol dehydrogenase 10 (all-trans)	0.00145021	0.0631917
H3156G07	Mm.103284		Mus musculus transcribed sequences	0.00145678	0.0633106
H3061A01	Mm.246668	Smarca5	SWI/SNF related, matrix associated, actin dependent regulator of chromatin, subfamily a, member 5	0.00147307	0.0638497
H3129E08	Mm.32901	AI467484	expressed sequence AI467484	0.00152008	0.0657145
H3076C01	Mm.249076	1200009I24Rik	RIKEN cDNA 1200009I24 gene	0.00152197	0.0656242
P202	Mm.1249	Lamc1	laminin, gamma 1	0.00152389	0.0655354
H3147G03	Mm.65979	Strn3	striatin, calmodulin binding protein 3	0.00153245	0.0657317
H3053E04	Mm.4356	Cnn1	calponin 1	0.00153634	0.0657274
H3147E06	Mm.2180	Hspcb	heat shock protein 1, beta	0.00154125	0.0657666
H3024E09			EST	0.00154683	0.0658342
H3129E03	Mm.83241	Mkrn1	makorin, ring finger protein, 1	0.0015548	0.0660027
H3061H06	Mm.292470	AA545217	expressed sequence AA545217	0.00158877	0.0672714
H3039A09	Mm.172679	Spata5	spermatogenesis associated 5	0.00161626	0.0682601
H3136B10	Mm.280842	Hnrpab	heterogeneous nuclear ribonucleoprotein A/B	0.00161737	0.0681321
H3038G08			EST	0.00164305	0.0690376
H3142A02	Mm.288765		Mus musculus transcribed sequence with weak similarity to protein sp:O00124 (H.sapiens) REP8_HUMAN Rep-8 protein (Reproduction 8 protein) (D8S2298E)	0.00164622	0.0689946
H3129B01	Mm.41367	Ddx42	DEAD (Asp-Glu-Ala-Asp) box polypeptide 42	0.00165317	0.0691102
H3156B06	Mm.103279		Mus musculus transcribed sequences	0.00168624	0.0703139
H3021H05	Mm.30709	Pdcl	phosducin-like	0.00168864	0.0702362
H3014G12	Mm.180052	Ube2d2	ubiquitin-conjugating enzyme E2D 2	0.0016928	0.070232
H3095G01	Mm.289936	Psat1	phosphoserine aminotransferase 1	0.00170553	0.0705822
H3153B10	Mm.277713	D3Jfr1	DNA segment, Chr 3, MJeffers 1	0.00171783	0.0709134
H3119B04	Mm.285724	Hspa8	heat shock protein 8	0.0017289	0.0711919
H3112A02	Mm.279804	2510026C23Rik	RIKEN cDNA 2510026C23 gene	0.00173037	0.0710746
H3116E03	Mm.216321	Ate1	arginine-tRNA-protein transferase 1	0.00174095	0.0713313
P753	Mm.235580	Rbl2	retinoblastoma-like 2	0.00175177	0.0715965
H3090C02	Mm.135989	Pvrl3	poliovirus receptor-related 3	0.00177504	0.0723682
H3121E07	Mm.87246	Pcdh18	protocadherin 18	0.00177716	0.0722757
H3005F02	Mm.274690	Hnrpc	heterogeneous nuclear ribonucleoprotein C	0.00178132	0.0722663
H3140D08	Mm.278458	Fkbp1a	FK506 binding protein 1a	0.00180573	0.0730765
H3025D01	Mm.14768	Rex3	reduced expression 3	0.00181036	0.0730843
H3027D11	Mm.22239	Ap1m2	adaptor protein complex AP-1, mu 2 subunit	0.0018142	0.0730604
H3050H04			EST	0.00181991	0.0731114
H3006F04	Mm.290840	Aco1	aconitase 1	0.00183001	0.0733385
T164	Mm.181485	Nck1	non-catalytic region of tyrosine kinase adaptor protein 1	0.00183557	0.0733826
H3104B06	Mm.279923	Nedd4	neural precursor cell expressed, developmentally down-regulted gene 4	0.00184381	0.0735337
H3066C05	Mm.28029	Ndfip2	Nedd4 family interacting protein 2	0.00185209	0.0736855
P833	Mm.225096	Itga6	integrin alpha 6	0.00186881	0.0741716
H3001B12	Mm.31512	Rnf2	ring finger protein 2	0.00189175	0.0749013
P887	Mm.757	Arha	ras homolog gene family, member A	0.00190559	0.0752687
H3134H03			EST	0.0019075	0.0751639
H3132G01			EST	0.0019408	0.0762935
H3113A02	Mm.202360	Chrac1	chromatin accessibility complex 1	0.00194343	0.0762148
H3059A08	Mm.117156	Ptplb	protein tyrosine phosphatase-like (proline instead of catalytic arginine), member b	0.00195527	0.0764971
H3028C03	Mm.45602	Brd8	bromodomain containing 8	0.00196075	0.0765295
H3115C07	Mm.274285	Opa1	optic atrophy 1 homolog (human)	0.00197247	0.0768053
H3124E09	Mm.33622	2310040C09Rik	RIKEN cDNA 2310040C09 gene	0.00197321	0.0766527
H3127A11	Mm.280068	Chc1l	chromosome condensation 1-like	0.00199852	0.0774533
H3141H07	Mm.235283	Dpysl2	dihydropyrimidinase-like 2	0.00200731	0.0776114
H3011B01	Mm.210018	Plekhc1	pleckstrin homology domain containing, family C (with FERM domain) member 1	0.00201168	0.0775982
H3059E10	Mm.25519		Mus musculus transcribed sequences	0.00201433	0.0775188
H3007F01	Mm.203	Apex1	apurinic/apyrimidinic endonuclease 1	0.00201715	0.0774465
H3055D05	Mm.205421	F730017H24Rik	RIKEN cDNA F730017H24 gene	0.00203109	0.0778001
H3052E12	Mm.46582	BC019731	cDNA sequence BC019731	0.00203352	0.0777127
H3002E05	Mm.271944	Rab1	RAB1, member RAS oncogene family	0.00203393	0.0775484
H3024E11			EST	0.00203431	0.0773836
H3157E10	Mm.38526	1100001I19Rik	RIKEN cDNA 1100001I19 gene	0.00204246	0.0775147
H3084H04	Mm.4880	Cbln1	cerebellin 1 precursor protein	0.00204451	0.0774141
H3138A02	Mm.21876	Pak4	p21 (CDKN1A)-activated kinase 4	0.00204548	0.0772733
H3092C02	Mm.272770	Usp2	ubiquitin specific protease 2	0.00207244	0.0781124
H3111F09	Mm.29640	0610005A07Rik	RIKEN cDNA 0610005A07 gene	0.00207893	0.0781784
H3035F10	Mm.275766	1110001F24Rik	RIKEN cDNA 1110001F24 gene	0.00207949	0.0780212
H3043G03	Mm.24765	Rnf20	ring finger protein 20	0.00208175	0.0779283
H3135D09	Mm.207422	C030046I01Rik	RIKEN cDNA C030046I01 gene	0.0020843	0.0778469
H3150B04	Mm.219040	Tcfcp2	transcription factor CP2	0.00209112	0.0779251
H3152C03	Mm.207311	6030458C11Rik	RIKEN cDNA 6030458C11 gene	0.00209256	0.0778026
H3122D05	Mm.298108	Cdkap1	CDK2 (cyclin-dependent kinase 2)-associated protein 1	0.00213096	0.0790519
H3100D04	Mm.4619	Msh2	mutS homolog 2 (E. coli)	0.0021337	0.0789757
H3100E04	Mm.2026	Birc2	baculoviral IAP repeat-containing 2	0.00215099	0.0794371
P283	Mm.35738	Catns	catenin src	0.00217268	0.0800588
H3130F07	Mm.297562	Nono	non-POU-domain-containing, octamer binding protein	0.00217743	0.0800548
H3154G09	Mm.218457		Mus musculus 0 day neonate head cDNA, RIKEN full-length enriched library, clone:4833422M11 product:unknown EST, full insert sequence	0.00218283	0.0800744
H3110H08			EST	0.00220729	0.0807918
H3134A11			EST	0.00221194	0.0807824
H3157F11			EST	0.00222714	0.0811575
H3071E06	Mm.20755	Supt6h	suppressor of Ty 6 homolog (S. cerevisiae)	0.00223877	0.0814011
H3037D03	Mm.29536	4933435A13Rik	RIKEN cDNA 4933435A13 gene	0.00224381	0.081405
H3026H02	Mm.274950	Nrd1	nardilysin, N-arginine dibasic convertase, NRD convertase 1	0.00225906	0.081778
T372	Mm.27254	Enpp1	ectonucleotide pyrophosphatase/phosphodiesterase 1	0.00226572	0.0818392
H3049D01	Mm.28232	2810017C20Rik	RIKEN cDNA 2810017C20 gene	0.00227588	0.0820264
H3017B12	Mm.249333	1300002F13Rik	RIKEN cDNA 1300002F13 gene	0.00228046	0.082012
H3015A05	Mm.321432	Ddx26	DEAD/H (Asp-Glu-Ala-Asp/His) box polypeptide 26	0.00229125	0.0822205
H3089B06	Mm.121918	4921528E07Rik	RIKEN cDNA 4921528E07 gene	0.0023105	0.082731
H3134B11	Mm.41274	5730439E10Rik	RIKEN cDNA 5730439E10 gene	0.00231239	0.082619
H3099F04	Mm.207895	Fnbp4	formin binding protein 4	0.00233429	0.0832209
H3027C02	Mm.25264	Ddx21	DEAD (Asp-Glu-Ala-Asp) box polypeptide 21	0.0023454	0.0834366
P773	Mm.120559	Tcf12	transcription factor 12	0.00235621	0.0836402
H3003B02	Mm.3390	Myo1b	myosin IB	0.00238677	0.0845429
H3045A11	Mm.20925	Gspt1	G1 to phase transition 1	0.00238682	0.0843633
H3123B06	Mm.7361	4432411E13Rik	RIKEN cDNA 4432411E13 gene	0.00240398	0.0847878
H3007E09	Mm.292742	2610101N10Rik	RIKEN cDNA 2610101N10 gene	0.00240905	0.0847852
H3037B12	Mm.1963	Srrm1	serine/arginine repetitive matrix 1	0.00241132	0.0846841
H3058D06	Mm.290924	Zfp91	zinc finger protein 91	0.00241747	0.0847195
H3047B07	Mm.234139	Tpp2	tripeptidyl peptidase II	0.00242112	0.0846673
H3125B07	Mm.159684	Tmpo	thymopoietin	0.00242394	0.0845864
H3135E01	Mm.218981		Mus musculus 0 day neonate lung cDNA, RIKEN full-length enriched library, clone:E030010D13 product:inferred: unnamed protein product {Homo sapiens}, full insert sequence	0.00243456	0.0847772
H3124B09	Mm.277585	App	amyloid beta (A4) precursor protein	0.00243688	0.0846791
H3015B10	Mm.3317	Gus	beta-glucuronidase	0.00244207	0.0846806
H3020G07	Mm.102770		Mus musculus transcribed sequences	0.00244615	0.084644
H3120G06	Mm.121878	Tpm1	tropomyosin 1, alpha	0.00244725	0.0845045
H3081B07	Mm.21848	Bzw1	basic leucine zipper and W2 domains 1	0.00244888	0.0843839
H3159G01	Mm.24042	Sfrs6	splicing factor, arginine/serine-rich 6	0.00245165	0.0843029
H3004E02	Mm.272101	Cdkn1b	cyclin-dependent kinase inhibitor 1B (P27)	0.00245496	0.084241
H3003G04	Mm.135989	Pvrl3	poliovirus receptor-related 3	0.00245506	0.0840691
H3079C12	Mm.290414	Mfn1	mitofusin 1	0.00246576	0.0842604
H3119E10	Mm.4888	Rad50	RAD50 homolog (S. cerevisiae)	0.00246683	0.0841224
H3008B04	Mm.310868		Mus musculus transcribed sequence with moderate similarity to protein ref:NP_001229.1 (H.sapiens) cyclin E1, isoform 1; Cyclin E; Cyclin Es; Cyclin Et [Homo sapiens]	0.0024925	0.0848223
H3155B01	Mm.178947	Becn1	beclin 1 (coiled-coil, myosin-like BCL2-interacting protein)	0.00249487	0.0847279
H3147D10	Mm.155839	1810015P09Rik	RIKEN cDNA 1810015P09 gene	0.00249552	0.0845755
H3018F02	Mm.4651	Kifap3	kinesin-associated protein 3	0.00252773	0.0854912
H3143H11	Mm.218686		Mus musculus transcribed sequence with weak similarity to protein pir:I58401 (M.musculus) I58401 protein-tyrosine kinase (EC 2.7.1.112) JAK3 - mouse	0.00253117	0.0854323
H3016A04			EST	0.00253915	0.0855264
H3147E05	Mm.2180	Hspcb	heat shock protein 1, beta	0.00253995	0.0853786
H3150D11	Mm.234247	Ddah1	dimethylarginine dimethylaminohydrolase 1	0.00254477	0.0853665
H3044C12	Mm.138876	Msn	moesin	0.0025482	0.0853078
H3060G04	Mm.188432	Spin	spindlin	0.00255593	0.0853928
H3133G01	Mm.254267	Oxr1	oxidation resistance 1	0.00256388	0.0854852
H3100A09	Mm.259969	BC003322	cDNA sequence BC003322	0.00256517	0.0853552
H3007B05	Mm.30142	Krt2-7	keratin complex 2, basic, gene 7	0.00259493	0.0861717
H3101E07	Mm.104744	Tjp2	tight junction protein 2	0.00261096	0.0865295
H3016C12	Mm.42195	Ruvbl1	RuvB-like protein 1	0.00261917	0.0866274
H3159D01	Mm.287173	Wee1	wee 1 homolog (S. pombe)	0.00264612	0.0873431
H3052B05	Mm.218910	Cul5	cullin 5	0.0026487	0.0872534
H3016D09	Mm.284906	Rars	arginyl-tRNA synthetase	0.00264936	0.0871009
H3116A06	Mm.27769	Pnrc1	proline-rich nuclear receptor coactivator 1	0.00265029	0.0869581
H3124A04	Mm.18210	Msh6	mutS homolog 6 (E. coli)	0.0026509	0.086805
H3080C02	Mm.246991	Klhl2	kelch-like 2, Mayven (Drosophila)	0.00266174	0.086987
H3016A05	Mm.25610	4932431F02Rik	RIKEN cDNA 4932431F02 gene	0.00269236	0.0878137
H3073F10	Mm.19306	Capn2	calpain 2	0.00271819	0.0884807
H3064F10	Mm.250265	Arnt	aryl hydrocarbon receptor nuclear translocator	0.00272673	0.0885836
H3147F09	Mm.28062	D130072O21Rik	RIKEN cDNA D130072O21 gene	0.00273744	0.0887566
P792	Mm.3280	Twist1	twist gene homolog 1 (Drosophila)	0.00274967	0.0889781
H3062G08	Mm.5831	Abce1	ATP-binding cassette, sub-family E (OABP), member 1	0.00275784	0.0890673
H3013E10	Mm.277870	Snx3	sorting nexin 3	0.0027628	0.0890529
H3070C12	Mm.297130	5430416A05Rik	RIKEN cDNA 5430416A05 gene	0.00276885	0.0890738
H3068F01	Mm.260594	2510002A14Rik	RIKEN cDNA 2510002A14 gene	0.00277059	0.088956
H3012E04	Mm.259617	Eif3s10	eukaryotic translation initiation factor 3, subunit 10 (theta)	0.00277414	0.0888967
H3071G05	Mm.292470	AA545217	expressed sequence AA545217	0.00278039	0.088924
H3159C01	Mm.29429	3110038L01Rik	RIKEN cDNA 3110038L01 gene	0.00278641	0.0889439
H3148C02	Mm.252561	Hs6st2	heparan sulfate 6-O-sulfotransferase 2	0.00279007	0.0888882
H3143G03	Mm.28500	Mtap	methylthioadenosine phosphorylase	0.00279087	0.0887421
H3137F01			EST	0.00279405	0.088672
H3051D04	Mm.22670	Mdm2	transformed mouse 3T3 cell double minute 2	0.00279822	0.0886338
H3018B08	Mm.26995	Thop1	thimet oligopeptidase 1	0.00280978	0.088829
H3077B01	Mm.173818		Mus musculus 11 days embryo head cDNA, RIKEN full-length enriched library, clone:6230417E17 product:unknown EST, full insert sequence	0.00281647	0.08887
H3028G08	Mm.289329	Metap2	methionine aminopeptidase 2	0.0028289	0.0890915
H3157G09	Mm.131524		Mus musculus 0 day neonate cerebellum cDNA, RIKEN full-length enriched library, clone:C230006B20 product:unknown EST, full insert sequence	0.00283716	0.089181
N841			EST	0.00286474	0.0898764
H3159E01	Mm.39487	Sall2	sal-like 2 (Drosophila)	0.0029121	0.0911885
H3109C02	Mm.132958	Timp3	tissue inhibitor of metalloproteinase 3	0.00291601	0.0911378
P901	Mm.116894	Tlr5	toll-like receptor 5	0.00292028	0.0910984
H3151A04	Mm.225096	Itga6	integrin alpha 6	0.00292285	0.0910062
H3141H03	Mm.259617	Eif3s10	eukaryotic translation initiation factor 3, subunit 10 (theta)	0.00292437	0.0908816
H3019E10	Mm.28200	D11Ertd730e	DNA segment, Chr 11, ERATO Doi 730, expressed	0.00292832	0.0908332
H3097E03	Mm.21454	Cbr2	carbonyl reductase 2	0.00293119	0.0907511
H3030A02	Mm.716	Cpsf2	cleavage and polyadenylation specific factor 2	0.00294608	0.0910411
H3068B09	Mm.293266	Gabpb1	GA repeat binding protein, beta 1	0.00294791	0.090927
H3147A01	Mm.270440	2700084L06Rik	RIKEN cDNA 2700084L06 gene	0.0029554	0.0909877
H3085E06	Mm.28424	LOC228790	additional sex combs like 1	0.00296238	0.0910322
H3044D03	Mm.234023		Mus musculus transcribed sequences	0.00297718	0.0913167
H3030D03	Mm.220817	AW555814	expressed sequence AW555814	0.00299123	0.0915772
P002	Mm.291184		Mus musculus similar to Lactase-phlorizin hydrolase precursor (Lactase-glycosylceramidase) (LOC226413), mRNA	0.00299585	0.0915486
H3135H08	Mm.59393	Usp49	ubiquitin specific protease 49	0.00300371	0.0916188
H3087C01	Mm.4618	D030041N15Rik	RIKEN cDNA D030041N15 gene	0.00301	0.0916408
H3016C07	Mm.2769	Mlp	MARCKS-like protein	0.00301015	0.0914765
P952	Mm.28888	Irx2	Iroquois related homeobox 2 (Drosophila)	0.00301884	0.0915716
H3134D09	Mm.12903	Sema3f	sema domain, immunoglobulin domain (Ig), short basic domain, secreted, (semaphorin) 3 F	0.00304586	0.0922211
H3083F09	Mm.292049	Phtf	putative homeodomain transcription factor	0.00306272	0.0925615
H3024B04	Mm.256034	Cct3	chaperonin subunit 3 (gamma)	0.00306554	0.092477
H3118D01			EST	0.00306887	0.0924082
H3154F01	Mm.266668	BC005537	cDNA sequence BC005537	0.00308713	0.0927885
H3123B12	Mm.259617	Eif3s10	eukaryotic translation initiation factor 3, subunit 10 (theta)	0.00310976	0.0932985
H3111C05	Mm.17917	D4Wsu27e	DNA segment, Chr 4, Wayne State University 27, expressed	0.00313461	0.0938729
H3032B08	Mm.143248		Mus musculus transcribed sequences	0.00314058	0.0938812
H3027A07	Mm.185453	Eif4g2	eukaryotic translation initiation factor 4, gamma 2	0.00314608	0.0938751
H3061C03	Mm.35350	Top1	topoisomerase (DNA) I	0.00316258	0.094197
H3048F06	Mm.267956		Mus musculus 0 day neonate eyeball cDNA, RIKEN full-length enriched library, clone:E130112C09 product:unclassifiable, full insert sequence	0.00316502	0.0940993
H3029D01	Mm.4580	Slc4a2	solute carrier family 4 (anion exchanger), member 2	0.00317387	0.0941923
H3057A05	Mm.70546	2810429O05Rik	RIKEN cDNA 2810429O05 gene	0.00317525	0.0940638
H3041B06	Mm.252171	Snx2	sorting nexin 2	0.00319269	0.0944109
H3096C12			EST	0.0031937	0.0942713
H3093F03			EST	0.00320423	0.0944131
T449	Mm.253424	Il1rap	interleukin 1 receptor accessory protein	0.00320663	0.094315
H3138D12	Mm.298110	Eef1a1	eukaryotic translation elongation factor 1 alpha 1	0.00322062	0.0945577
H3036H04	Mm.27291	Bysl	bystin-like	0.00322411	0.0944918
H3097D02	Mm.112333	6030410K14	hypothetical protein 6030410K14	0.00322869	0.0944579
H3066G05	Mm.159915	D1Ucla4	DNA segment, Chr 1, University of California at Los Angeles 4	0.00323093	0.0943559
H3076H04	Mm.24094	Dirc2	disrupted in renal carcinoma 2 (human)	0.00323171	0.0942116
H3111A07	Mm.262059	Cbx5	chromobox homolog 5 (Drosophila HP1a)	0.00323218	0.0940587
H3125A07	Mm.22708	Serpinh1	serine (or cysteine) proteinase inhibitor, clade H, member 1	0.00325193	0.0944665
H3074E12	Mm.16974	Usp47	ubiquitin specific protease 47	0.00326402	0.0946507
H3062E09	Mm.262000	Ptp4a1	protein tyrosine phosphatase 4a1	0.00327667	0.0948506
H3058A08	Mm.23904	Takrp	T-cell activation kelch repeat protein	0.00328388	0.0948925
H3144H04	Mm.31041	Gstm6	glutathione S-transferase, mu 6	0.00331134	0.0955186
H3080H10	Mm.299014	Rngtt	RNA guanylyltransferase and 5'-phosphatase	0.00331502	0.0954575
P787	Mm.222	Trp53	transformation related protein 53	0.00334203	0.0960675
H3159D05	Mm.237296	Phkb	phosphorylase kinase beta	0.00338391	0.0971016
H3129H07			EST	0.00338498	0.0969634
H3091C10	Mm.142872	Hnrpk	heterogeneous nuclear ribonucleoprotein K	0.0033888	0.0969045
H3031F11	Mm.993	Dhx15	DEAH (Asp-Glu-Ala-His) box polypeptide 15	0.00341099	0.0973698
H3083C01	Mm.259374	Kif23	kinesin family member 23	0.00342225	0.0975222
H3131B12	Mm.272976	4632412E09Rik	RIKEN cDNA 4632412E09 gene	0.00343805	0.0978032
T019	Mm.9925	Idh1	isocitrate dehydrogenase 1 (NADP+), soluble	0.00346395	0.0983702
H3081E12	Mm.171639	2610312E17Rik	RIKEN cDNA 2610312E17 gene	0.00346532	0.0982399
H3080E07	Mm.5473		Mus musculus similar to MGC45438 protein (LOC239691), mRNA	0.00348241	0.0985546
H3122H01	Mm.3248	Tgfb1i1	transforming growth factor beta 1 induced transcript 1	0.00349387	0.0987093
H3105B10	Mm.260114	Ccnb1	cyclin B1	0.00352684	0.0994701
P123	Mm.154109	6720416L16Rik	RIKEN cDNA 6720416L16 gene	0.00353442	0.0995135
H3064C04	Mm.259374	Kif23	kinesin family member 23	0.00353444	0.0993444
H3074A02	Mm.2026	Birc2	baculoviral IAP repeat-containing 2	0.00356255	0.0999637
H3026D06	Mm.3308	Ywhah	tyrosine 3-monooxygenase/tryptophan 5-monooxygenase activation protein, eta polypeptide	0.00357861	0.100244
H3033F03	Mm.28270	Cdc5l	cell division cycle 5-like (S. pombe)	0.00357897	0.100084
H3134H01	Mm.28427	BC021395	cDNA sequence BC021395	0.00358006	0.0999443

## Sheet: st72_down_fdr10
List of repressed genes at 72h in hEWS/FLI1V5 expressing STO cells (FDR 10%)
Clone ID	Unigene cluster	Gene symbol	Gene name	t-test p value	FDR
H3024C08	Mm.7401	Hs1bp1	HS1 binding protein	7.2978e-08	0.00120202
P407	Mm.250422	Serpine1	serine (or cysteine) proteinase inhibitor, clade E, member 1	1.52186e-07	0.00125333
H3005F06	Mm.38241	Irak1	interleukin-1 receptor-associated kinase 1	1.07217e-06	0.00588659
H3029F04	Mm.24069	Fem1b	feminization 1 homolog b (C. elegans)	1.36107e-06	0.00560453
H3076G08	Mm.321668		Mus musculus transcribed sequence with strong similarity to protein ref:NP_072045.1 (H.sapiens) ribosomal protein S18; 40S ribosomal protein S18 [Homo sapiens]	2.42916e-06	0.00800213
H3020F06	Mm.294166	Snx10	sorting nexin 10	6.91368e-06	0.0189792
H3024B07	Mm.3862	Igf2	insulin-like growth factor 2	7.65283e-06	0.0180071
H3006F09	Mm.22745	Oprs1	opioid receptor, sigma 1	7.72351e-06	0.0159018
H3123D08	Mm.216528	Vps29	vacuolar protein sorting 29 (S. pombe)	7.74107e-06	0.014167
H3090G01	Mm.76694	1110067D22Rik	RIKEN cDNA 1110067D22 gene	8.4775e-06	0.0139633
H3002H10	Mm.30060	2310008N12Rik	RIKEN cDNA 2310008N12 gene	9.49677e-06	0.0142201
H3028F02	Mm.27330	Smarce1	SWI/SNF related, matrix associated, actin dependent regulator of chromatin, subfamily e, member 1	1.01544e-05	0.0139378
H3126B04	Mm.275810	2210402A09Rik	RIKEN cDNA 2210402A09 gene	1.01712e-05	0.012887
H3148A01	Mm.234266	Sdc2	syndecan 2	1.02875e-05	0.0121033
H3089B09	Mm.291523	Ddx18	DEAD (Asp-Glu-Ala-Asp) box polypeptide 18	1.15117e-05	0.0126406
H3093H04	Mm.34195		Mus musculus transcribed sequences	1.3032e-05	0.0134157
H3111B01	Mm.246069	3110018K12Rik	RIKEN cDNA 3110018K12 gene	1.4481e-05	0.0140304
H3037H02	Mm.28252		Mus musculus 10 days neonate skin cDNA, RIKEN full-length enriched library, clone:4732481D19 product:similar to SIMILAR TO MOLYBDENUM COFACTOR SULFURASE [Homo sapiens], full insert sequence	1.45176e-05	0.0132845
H3135A03	Mm.19834	Ndufa8	NADH dehydrogenase (ubiquinone) 1 alpha subcomplex, 8	1.58971e-05	0.0137811
H3112G02	Mm.5291	Rps5	ribosomal protein S5	1.67619e-05	0.0138043
P865	Mm.284248	Ccl5	chemokine (C-C motif) ligand 5	1.73926e-05	0.0136416
H3056G11	Mm.5856	6330412F12Rik	RIKEN cDNA 6330412F12 gene	1.85654e-05	0.0138996
H3067A11	Mm.277812	Vil2	villin 2	2.12846e-05	0.0152426
H3045H03	Mm.28999	0610033H09Rik	RIKEN cDNA 0610033H09 gene	2.14641e-05	0.0147307
P633	Mm.157069	Dlk1	delta-like 1 homolog (Drosophila)	2.42705e-05	0.0159904
H3104B09	Mm.21978	5330431N19Rik	RIKEN cDNA 5330431N19 gene	2.42747e-05	0.015378
H3149D06	Mm.14825	Idh3g	isocitrate dehydrogenase 3 (NAD+), gamma	2.45422e-05	0.0149717
P596	Mm.3460	Cd14	CD14 antigen	2.51581e-05	0.0147993
H3011G02	Mm.133292	Actb	actin, beta, cytoplasmic	2.82986e-05	0.0160726
H3094B04	Mm.138332	3110006P09Rik	RIKEN cDNA 3110006P09 gene	2.84633e-05	0.0156273
H3032D06	Mm.298306	Rpl29	ribosomal protein L29	3.02889e-05	0.0160932
H3126C02	Mm.291802	Rpl18	ribosomal protein L18	3.03259e-05	0.0156093
H3006F01	Mm.273515	2410001E19Rik	RIKEN cDNA 2410001E19 gene	3.05649e-05	0.0152556
H3029D09	Mm.297033	Mrps11	mitochondrial ribosomal protein S11	3.31494e-05	0.0160589
P273	Mm.133292	Actb	actin, beta, cytoplasmic	3.3629e-05	0.0158258
H3002E01	Mm.28212	Sepr	selenoprotein R	3.52343e-05	0.0161207
H3119D12	Mm.259470	Osbpl1a	oxysterol binding protein-like 1A	3.55328e-05	0.0158179
H3151F06	Mm.11223	Xdh	xanthine dehydrogenase	3.60338e-05	0.0156187
H3110G04	Mm.268921	Pldn	pallidin	3.9062e-05	0.0164972
H3155H05	Mm.235137	Scye1	small inducible cytokine subfamily E, member 1	4.80487e-05	0.0197852
H3016G06	Mm.298306	Rpl29	ribosomal protein L29	5.20755e-05	0.0209204
H3103C03	Mm.33919	C330023M02Rik	RIKEN cDNA C330023M02 gene	5.31438e-05	0.0208412
H3027E01	Mm.916	H2afz	H2A histone family, member Z	5.45815e-05	0.0209072
H3080H12	Mm.26237	Cry1	cryptochrome 1 (photolyase-like)	6.14192e-05	0.0229917
H3101D11	Mm.28193	1810031K17Rik	RIKEN cDNA 1810031K17 gene	6.71641e-05	0.0245835
P690	Mm.3862	Igf2	insulin-like growth factor 2	6.71719e-05	0.0240519
H3080B06	Mm.2815	1110021H02Rik	RIKEN cDNA 1110021H02 gene	6.72898e-05	0.0235815
H3075G03	Mm.21728	Psma7	proteasome (prosome, macropain) subunit, alpha type 7	6.91887e-05	0.0237418
H3002D02	Mm.133292	Actb	actin, beta, cytoplasmic	7.01477e-05	0.0235797
H3007C11	Mm.182542		Mus musculus transcribed sequences	7.1056e-05	0.0234073
H3017B02	Mm.210334	Mbtd1	mbt domain containing 1	7.20074e-05	0.0232556
H3023G02	Mm.18565	Plp2	proteolipid protein 2	7.58383e-05	0.0240218
H3149E05	Mm.285467	Agt	angiotensinogen	7.5933e-05	0.023598
H3058F07	Mm.27575	Zfp68	Zinc finger protein 68	7.91203e-05	0.0241332
H3093F01	Mm.12864	1190002L16Rik	RIKEN cDNA 1190002L16 gene	7.94922e-05	0.0238058
H3102D08	Mm.2053	5830427H10Rik	RIKEN cDNA 5830427H10 gene	7.98196e-05	0.0234769
T020	Mm.14825	Idh3g	isocitrate dehydrogenase 3 (NAD+), gamma	7.99721e-05	0.0231091
H3013G07	Mm.14644	Tsn	translin	8.14605e-05	0.0231334
H3025B02	Mm.21728	Psma7	proteasome (prosome, macropain) subunit, alpha type 7	8.27806e-05	0.0231098
P312	Mm.234266	Sdc2	syndecan 2	8.28595e-05	0.0227463
H3022B01			EST	8.85339e-05	0.0239056
H3147H04	Mm.291482	1810057E01Rik	RIKEN cDNA 1810057E01 gene	8.93596e-05	0.0237394
H3112D07	Mm.240885	Dusp14	dual specificity phosphatase 14	9.09024e-05	0.0237659
H3037A03			EST	0.000102158	0.0262913
H3016B03	Mm.13886	Sui1-rs1	suppressor of initiator codon mutations, related sequence 1 (S. cerevisiae)	0.000102366	0.0259396
H3081B11	Mm.219671	Sf3b4	splicing factor 3b, subunit 4	0.00010276	0.0256448
H3005A12	Mm.151186		Mus musculus activated spleen cDNA, RIKEN full-length enriched library, clone:F830021D11 product:CDNA FLJ20302 FIS, CLONE HEP06648 homolog [Homo sapiens], full insert sequence	0.000104283	0.0256366
H3040A04	Mm.1786	Aprt	adenine phosphoribosyl transferase	0.000105476	0.0255484
H3015B07	Mm.46029	2610029K21Rik	RIKEN cDNA 2610029K21 gene	0.000108439	0.0258854
H3016E11	Mm.42790	Rps18	ribosomal protein S18	0.000108487	0.025527
H3159B11	Mm.13080	Gng12	guanine nucleotide binding protein (G protein), gamma 12	0.000108546	0.0251812
H3130H10	Mm.43778	Rps14	ribosomal protein S14	0.000108626	0.0248496
H3118G10	Mm.2136	Cox4i1	cytochrome c oxidase subunit IV isoform 1	0.000110631	0.0249617
H3077F03	Mm.27888	D1Ertd757e	DNA segment, Chr 1, ERATO Doi 757, expressed	0.000111131	0.0247357
H3006C10	Mm.291802	Rpl18	ribosomal protein L18	0.000113985	0.0250325
H3006G01	Mm.7454	Igbp1	immunoglobulin (CD79A) binding protein 1	0.000118333	0.0256456
H3131F10	Mm.24806	1810013B01Rik	RIKEN cDNA 1810013B01 gene	0.000120314	0.0257362
T388	Mm.155696	Bet1l	blocked early in transport 1 homolog (S. cerevisiae)-like	0.000121508	0.0256584
H3018F06	Mm.165079	Crry	complement receptor related protein	0.000121542	0.0253408
H3027E02	Mm.916	H2afz	H2A histone family, member Z	0.00012682	0.0261107
H3107E04	Mm.1405	Wbp2	WW domain binding protein 2	0.000129799	0.0263941
H3151A07	Mm.21214	1500001L15Rik	RIKEN cDNA 1500001L15 gene	0.000134133	0.0269427
H3094B06	Mm.242814	Son	Son cell proliferation protein	0.000134734	0.0267375
H3039C09	Mm.274811	D7Ertd156e	DNA segment, Chr 7, ERATO Doi 156, expressed	0.000136504	0.0267661
T086	Mm.277376	Abca1	ATP-binding cassette, sub-family A (ABC1), member 1	0.000137997	0.0267406
H3028G10	Mm.29906	Ebna1bp2	EBNA1 binding protein 2	0.000138589	0.026543
H3024A12	Mm.30927	3300001P08Rik	RIKEN cDNA 3300001P08 gene	0.000152818	0.0289317
H3059H05	Mm.88349	3200001F09Rik	RIKEN cDNA 3200001F09 gene	0.000156777	0.029344
H3139F11	Mm.38597		Mus musculus adult male olfactory brain cDNA, RIKEN full-length enriched library, clone:6430537K16 product:unknown EST, full insert sequence	0.000160827	0.0297638
H3004F02	Mm.821	Snrpa1	small nuclear ribonucleoprotein polypeptide A'	0.000161405	0.0295388
H3153F10	Mm.29859	Eif2s2	eukaryotic translation initiation factor 2, subunit 2 (beta)	0.000163473	0.0295887
H3051F03	Mm.30217	Cib1	calcium and integrin binding 1 (calmyrin)	0.000163695	0.0293068
H3023E03	Mm.214569	2810055C14Rik	RIKEN cDNA 2810055C14 gene	0.000165689	0.0293448
P013	Mm.38049	Tlr4	toll-like receptor 4	0.00016793	0.0294252
T346	Mm.6375	Gyg1	glycogenin 1	0.000170136	0.029498
P285	Mm.281367	Cdc2a	cell division cycle 2 homolog A (S. pombe)	0.00017085	0.0293132
H3040H07			EST	0.000173314	0.0294295
H3080G09	Mm.172167		Mus musculus transcribed sequences	0.000175136	0.0294353
H3081H01	Mm.28355	Lrrc8	leucine-rich repeat-containing 8	0.000175358	0.0291749
H3027A04	Mm.291595	Bteb1	basic transcription element binding protein 1	0.00017576	0.0289495
H3141B09	Mm.291032	C330027G06Rik	RIKEN cDNA C330027G06 gene	0.000178792	0.0291573
H3122E06	Mm.260855	Meis1	myeloid ecotropic viral integration site 1	0.000185329	0.0299269
H3005G06	Mm.2412	Ppib	peptidylprolyl isomerase B	0.000186309	0.0297932
H3009F03	Mm.916	H2afz	H2A histone family, member Z	0.000186613	0.0295548
H3029B10	Mm.272541	2410002O22Rik	RIKEN cDNA 2410002O22 gene	0.000187842	0.0294662
H3147F10	Mm.20922	Map2k1ip1	mitogen-activated protein kinase kinase 1 interacting protein 1	0.000188576	0.0293023
H3054H05	Mm.52583	D13Wsu50e	DNA segment, Chr 13, Wayne State University 50, expressed	0.000188593	0.029031
H3014A01	Mm.216250	Mrps10	mitochondrial ribosomal protein S10	0.000189587	0.0289138
H3084D10			EST	0.00019089	0.0288453
H3009D10	Mm.916	H2afz	H2A histone family, member Z	0.000192362	0.0288036
H3054H06	Mm.52583	D13Wsu50e	DNA segment, Chr 13, Wayne State University 50, expressed	0.000192743	0.0286007
P650	Mm.3798	Fah	fumarylacetoacetate hydrolase	0.000197848	0.029096
H3009E12	Mm.126873	Ppie	peptidylprolyl isomerase E (cyclophilin E)	0.000199463	0.029074
T323	Mm.40678	Pde1a	phosphodiesterase 1A, calmodulin-dependent	0.000199968	0.0288919
H3113F08	Mm.11780	Tm7sf1	transmembrane 7 superfamily member 1	0.000200624	0.0287347
H3097E11	Mm.294445	3110005G23Rik	RIKEN cDNA 3110005G23 gene	0.000206768	0.0293592
H3028F03	Mm.930	Ctsl	cathepsin L	0.000208007	0.0292827
H3098A08	Mm.28712	Ndufs7	NADH dehydrogenase (ubiquinone) Fe-S protein 7	0.000213336	0.0297785
H3054H02	Mm.289667		Mus musculus adult male testis cDNA, RIKEN full-length enriched library, clone:4933407G20 product:unclassifiable, full insert sequence	0.000213521	0.0295538
T456	Mm.244263	Ccl4	chemokine (C-C motif) ligand 4	0.000215328	0.0295556
H3099C11	Mm.26852	Zfp277	zinc finger protein 277	0.000215401	0.0293212
H3016B08	Mm.38055	Es10	esterase 10	0.000220471	0.0297654
H3028G06	Mm.250783	6530403A03Rik	RIKEN cDNA 6530403A03 gene	0.000225589	0.0302087
H3076G05	Mm.210305	1110013G13Rik	RIKEN cDNA 1110013G13 gene	0.000229918	0.0305402
H3156A03	Mm.117896	Pcm1	pericentriolar material 1	0.000235165	0.0309872
H3121D04	Mm.23258	1110031N17Rik	RIKEN cDNA 1110031N17 gene	0.000235209	0.030747
H3038C08	Mm.287799	9530003A05	hypothetical protein 9530003A05	0.000239107	0.0310105
P188	Mm.276042	Actn4	actinin alpha 4	0.000245747	0.0316226
H3007D12	Mm.260403		Mus musculus nuclear cap binding protein subunit 1, 80kDa, mRNA (cDNA clone IMAGE:6402922)	0.000247379	0.0315859
H3006C11	Mm.42790	Rps18	ribosomal protein S18	0.000250015	0.0316769
H3089A07	Mm.288765		Mus musculus transcribed sequence with weak similarity to protein sp:O00124 (H.sapiens) REP8_HUMAN Rep-8 protein (Reproduction 8 protein) (D8S2298E)	0.000250098	0.0314456
P357	Mm.4717	Lamc2	laminin, gamma 2	0.000255223	0.0318468
H3156C07	Mm.30191	2600013G09Rik	RIKEN cDNA 2600013G09 gene	0.000256412	0.0317545
P826	Mm.42944	Skp1a	S-phase kinase-associated protein 1A	0.00025666	0.0315481
H3121H12	Mm.41583	1810020D17Rik	RIKEN cDNA 1810020D17 gene	0.00025683	0.0313352
H3096A03	Mm.2136	Cox4i1	cytochrome c oxidase subunit IV isoform 1	0.000257713	0.0312117
H3011A06	Mm.250567	2010317E03Rik	RIKEN cDNA 2010317E03 gene	0.000260505	0.0313196
H3105D01	Mm.235366	4930544L10Rik	RIKEN cDNA 4930544L10 gene	0.000264919	0.0316194
H3113G05	Mm.277533	2310076K21Rik	RIKEN cDNA 2310076K21 gene	0.000274076	0.032477
H3050D03			EST	0.000274428	0.0322865
H3009D05	Mm.43831	Lgals1	lectin, galactose binding, soluble 1	0.000274454	0.0320605
H3144F09	Mm.34027	Rab7l1	RAB7, member RAS oncogene family-like 1	0.000276035	0.0320182
H3021H09	Mm.150701	1700017I17Rik	RIKEN cDNA 1700017I17 gene	0.000277613	0.031976
H3125H04	Mm.272024	Mad2l1bp	MAD2L1 binding protein	0.000282379	0.0322991
H3084E05	Mm.282351	Gstm5	glutathione S-transferase, mu 5	0.000284834	0.0323552
H3103E04	Mm.279106	1500015J03Rik	RIKEN cDNA 1500015J03 gene	0.000286893	0.0323659
H3088A04	Mm.173256		Mus musculus adult female vagina cDNA, RIKEN full-length enriched library, clone:9930023J12 product:unknown EST, full insert sequence	0.000293266	0.0328598
H3015C04	Mm.180063	0610038F07Rik	RIKEN cDNA 0610038F07 gene	0.000302223	0.0336345
H3126A04	Mm.3862	Igf2	insulin-like growth factor 2	0.000302278	0.0334149
H3120F12	Mm.249479	Dncic2	dynein, cytoplasmic, intermediate chain 2	0.000305302	0.0335241
H3022H08	Mm.121265	Psma1	proteasome (prosome, macropain) subunit, alpha type 1	0.000306575	0.0334411
H3021B05	Mm.44227		Mus musculus transcribed sequence with moderate similarity to protein sp:O00217 (H.sapiens) NUIM_HUMAN NADH-ubiquinone oxidoreductase 23 kDa subunit, mitochondrial precursor (Complex I-23KD) (CI-23KD) (TYKY subunit)	0.000310767	0.0336753
H3049F02	Mm.4512	Cbr3	carbonyl reductase 3	0.000311047	0.0334854
H3143B04	Mm.178	Cryab	crystallin, alpha B	0.000312552	0.0334288
H3152E12	Mm.271620	AW049900	expressed sequence AW049900	0.000321809	0.0341969
H3027H06	Mm.296730	Rpl15	ribosomal protein L15	0.000322628	0.0340641
H3112G03	Mm.5291	Rps5	ribosomal protein S5	0.000322646	0.0338491
H3104C05	Mm.319652	5830484A20Rik	RIKEN cDNA 5830484A20 gene	0.000328794	0.0342757
H3047F07	Mm.25083		Mus musculus transcribed sequences	0.000334597	0.0346613
H3097G03	Mm.219657	Trim34	tripartite motif protein 34	0.000335547	0.0345425
H3121H06	Mm.25119	3230401D17Rik	RIKEN cDNA 3230401D17 gene	0.000339241	0.0347058
H3081H11	Mm.273152	Psmd8	proteasome (prosome, macropain) 26S subunit, non-ATPase, 8	0.000340296	0.0345989
H3035C05	Mm.326427		Mus musculus transcribed sequences	0.000342785	0.0346381
H3126H11	Mm.275154		Mus musculus 11 days embryo whole body cDNA, RIKEN full-length enriched library, clone:2700083E18 product:unknown EST, full insert sequence	0.000344148	0.0345638
H3016D10			EST	0.000351149	0.0350532
H3139A08	Mm.252718	Rgnef	Rho-guanine nucleotide exchange factor	0.000354789	0.0352032
H3033B08	Mm.2136	Cox4i1	cytochrome c oxidase subunit IV isoform 1	0.0003584	0.0353485
H3129A07			EST	0.00036359	0.035647
H3080D10	Mm.279070	Prsc2	protease, cysteine, 2 (NEDD8 specific)	0.000370867	0.0361453
P621	Mm.2136	Cox4i1	cytochrome c oxidase subunit IV isoform 1	0.000372713	0.0361115
H3074B08	Mm.283406	2810433K01Rik	RIKEN cDNA 2810433K01 gene	0.000374745	0.0360961
H3006B04	Mm.28063	5730466P16Rik	RIKEN cDNA 5730466P16 gene	0.000376774	0.0360805
H3067A12	Mm.222184	Nup37	nucleoporin 37	0.000377384	0.03593
H3066H01	Mm.219685	Pigf	phosphatidylinositol glycan, class F	0.000378435	0.035823
H3079H05	Mm.228071	5830435C13Rik	RIKEN cDNA 5830435C13 gene	0.000389046	0.036617
H3014A06	Mm.45272	Hspbap1	Hspb associated protein 1	0.000389236	0.0364268
H3096H02			EST	0.000389326	0.0362294
H3076E12	Mm.7892	Rfx1	regulatory factor X, 1 (influences HLA class II expression)	0.000391956	0.0362692
H3018A01			EST	0.000398157	0.0366371
H3093D01			EST	0.000401474	0.0367371
H3095H05	Mm.281003	Pscd3	pleckstrin homology, Sec7 and coiled-coil domains 3	0.000404328	0.0367938
T025	Mm.198138	Sdhc	succinate dehydrogenase complex, subunit C, integral membrane protein	0.000404412	0.0365993
H3108A01	Mm.19029	Isg20	interferon-stimulated protein	0.000407224	0.0366524
T357	Mm.253142	Ndufs4	NADH dehydrogenase (ubiquinone) Fe-S protein 4	0.000410687	0.0367632
H3038G11	Mm.291471	Tomm20	translocase of outer mitochondrial membrane 20 homolog (yeast)	0.00041327	0.0367945
H3136D07	Mm.28854	1110001D15Rik	RIKEN cDNA 1110001D15 gene	0.000416759	0.0369056
H3134B03	Mm.43778	Rps14	ribosomal protein S14	0.000417865	0.0368056
H3021A11	Mm.142132	Timm9	translocase of inner mitochondrial membrane 9 homolog (yeast)	0.000422584	0.0370233
H3006F05	Mm.248492	Sec23b	SEC23B (S. cerevisiae)	0.000427029	0.0372148
H3073E06	Mm.246069	3110018K12Rik	RIKEN cDNA 3110018K12 gene	0.000427774	0.0370835
H3076E11	Mm.32646	1110060O18Rik	RIKEN cDNA 1110060O18 gene	0.000430745	0.0371456
H3030D07			EST	0.000437647	0.0375442
H3011A10	Mm.24627	4833432B22Rik	RIKEN cDNA 4833432B22 gene	0.000441822	0.037706
H3017C01	Mm.236211	Thrap3	thyroid hormone receptor associated protein 3	0.000445213	0.0377995
H3108C06	Mm.25632	1810073G14Rik	RIKEN cDNA 1810073G14 gene	0.0004511	0.0381029
H3037D10	Mm.294885	Creg	cellular repressor of E1A-stimulated genes	0.000452018	0.0379857
P382	Mm.298213	Mod1	malic enzyme, supernatant	0.000454109	0.0379677
H3014G01	Mm.196508	Morf4l1	mortality factor 4 like 1	0.000454691	0.0378243
H3155H10	Mm.297977	Sycp3	synaptonemal complex protein 3	0.000457676	0.0378813
H3027H01	Mm.296730	Rpl15	ribosomal protein L15	0.000459194	0.0378169
H3097F07	Mm.157711	Elac2	elaC homolog 2 (E. coli)	0.000459497	0.0376536
H3004A07	Mm.40620	9130415E20Rik	RIKEN cDNA 9130415E20 gene	0.000459925	0.0375021
H3050F05	Mm.42459		Mus musculus RIKEN cDNA 4833427P12 gene (4833427P12Rik), mRNA	0.000462079	0.0374921
H3006F08	Mm.188851	Pdap1	PDGFA associated protein 1	0.000462466	0.0373396
H3079B05	Mm.22362	H47	histocompatibility 47	0.000464358	0.0373094
H3003A03	Mm.43831	Lgals1	lectin, galactose binding, soluble 1	0.00046703	0.037342
H3043F08	Mm.291593	Ppp1r2	protein phosphatase 1, regulatory (inhibitor) subunit 2	0.000468291	0.037262
H3126G06	Mm.267948		Mus musculus transcribed sequences	0.0004699	0.0372102
H3036D08	Mm.249872		Mus musculus transcribed sequence with strong similarity to protein pir:S12207 (M.musculus) S12207 hypothetical protein (B2 element) - mouse	0.000476932	0.0375864
H3019A12	Mm.276389	Hmox1	heme oxygenase (decycling) 1	0.000483857	0.0379505
H3054F07	Mm.240543	Hurp	hepatoma up-regulated protein	0.000489762	0.0382316
H3096A02	Mm.286830	Lap3	leucine aminopeptidase 3	0.000507913	0.0394615
H3079G08	Mm.2815	1110021H02Rik	RIKEN cDNA 1110021H02 gene	0.00051271	0.0396472
H3106E06	Mm.25366	Rnf44	ring finger protein 44	0.000522194	0.0401919
H3012D09	Mm.29898	2410015N17Rik	RIKEN cDNA 2410015N17 gene	0.000525982	0.0402951
H3122D04	Mm.288935		Mus musculus transcribed sequence with weak similarity to protein ref:NP_081764.1 (M.musculus) RIKEN cDNA 5730493B19 [Mus musculus]	0.00052835	0.0402891
P660	Mm.1776	Fth	ferritin heavy chain	0.000531131	0.0403146
H3075G01	Mm.277857	Cd63	Cd63 antigen	0.000545926	0.0412475
H3098F12	Mm.288460	MGC7717	hypothetical protein MGC7717	0.000548605	0.0412606
H3029F09	Mm.29045	Atp6v1e1	ATPase, H+ transporting, V1 subunit E isoform 1	0.000551559	0.0412942
H3079A03			EST	0.000556596	0.0414828
H3128D03	Mm.159965	0610040B21Rik	RIKEN cDNA 0610040B21 gene	0.00056049	0.0415848
P096	Mm.289841	2810430M08Rik	RIKEN cDNA 2810430M08 gene	0.000561405	0.0414659
H3076G06	Mm.293120	Stat2	signal transducer and activator of transcription 2	0.000562863	0.041388
H3035F11	Mm.122600	Nek2	NIMA (never in mitosis gene a)-related expressed kinase 2	0.000566113	0.041442
H3140D06	Mm.20863	Capn3	calpain 3	0.000574222	0.0418496
H3063F02	Mm.20794	Anxa7	annexin A7	0.000578568	0.0419806
H3123H01	Mm.6994	Hadh2	hydroxyacyl-Coenzyme A dehydrogenase type II	0.000580918	0.0419662
H3137C06	Mm.18843	Tgm2	transglutaminase 2, C polypeptide	0.000581542	0.0418278
H3042F04	Mm.71332	BC028953	cDNA sequence BC028953	0.000587442	0.0420685
H3009E07	Mm.154401		Mus musculus transcribed sequence with strong similarity to protein sp:P00722 (E. coli) BGAL_ECOLI Beta-galactosidase (Lactase)	0.000595333	0.042449
T151	Mm.6900	Grb2	growth factor receptor bound protein 2	0.000619344	0.0439707
P063	Mm.275563	Zfp278	zinc finger protein 278	0.000628471	0.0444272
H3039A03	Mm.247684	Acvr2	activin receptor IIA	0.000637825	0.0448958
H3025F10	Mm.246965	Sdhb	succinate dehydrogenase complex, subunit B, iron sulfur (Ip)	0.000639311	0.0448089
H3002B09	Mm.298102	Cycs	cytochrome c, somatic	0.000639991	0.0446665
H3021C12	Mm.364	Nfkbib	nuclear factor of kappa light chain gene enhancer in B-cells inhibitor, beta	0.000646595	0.044937
H3111D12	Mm.259568	Scarb2	scavenger receptor class B, member 2	0.000647482	0.0448096
H3158H08	Mm.25632	1810073G14Rik	RIKEN cDNA 1810073G14 gene	0.000653825	0.0450592
H3132H12	Mm.29658	Cklfsf3	chemokine-like factor super family 3	0.000661646	0.0454082
H3024F03	Mm.30072	Cox7a2l	cytochrome c oxidase subunit VIIa polypeptide 2-like	0.000665155	0.0454596
H3136B07	Mm.6343	Npm1	nucleophosmin 1	0.000678627	0.0461887
H3129A01	Mm.4514	Aldh1a1	aldehyde dehydrogenase family 1, subfamily A1	0.000684939	0.0464265
H3074D07	Mm.253329	MGC18837	hypothetical protein MGC18837	0.000686819	0.0463631
H3067A05	Mm.208955	BC031353	cDNA sequence BC031353	0.000690109	0.0463951
H3082E01	Mm.296840		Mus musculus 7 days neonate cerebellum cDNA, RIKEN full-length enriched library, clone:A730082K24 product:unknown EST, full insert sequence	0.000697825	0.0467231
H3003C02	Mm.29482	1110019C08Rik	RIKEN cDNA 1110019C08 gene	0.00070044	0.0467083
H3096B04	Mm.17539		Mus musculus transcribed sequence with moderate similarity to protein sp:P00722 (E. coli) BGAL_ECOLI Beta-galactosidase (Lactase)	0.000704733	0.0468051
H3124B05	Mm.103382	Ppfibp1	PTPRF interacting protein, binding protein 1 (liprin beta 1)	0.000705444	0.0466641
H3142B09			EST	0.000710075	0.0467826
H3095C08	Mm.291743	Dci	dodecenoyl-Coenzyme A delta isomerase (3,2 trans-enoyl-Coenyme A isomerase)	0.000711102	0.0466636
H3110E02	Mm.271855	Trim21	tripartite motif protein 21	0.000711228	0.0464867
H3064B09	Mm.171186	Lgals8	lectin, galactose binding, soluble 8	0.000711431	0.0463162
H3068D09	Mm.21901	D3Ertd176e	DNA segment, Chr 3, ERATO Doi 176, expressed	0.00071212	0.0461785
H3017B03			EST	0.000712315	0.0460099
H3046E08	Mm.29859	Eif2s2	eukaryotic translation initiation factor 2, subunit 2 (beta)	0.000713794	0.0459254
H3127A05	Mm.260139	BC023151	cDNA sequence BC023151	0.000719393	0.0461056
T132	Mm.298084	Atp5g1	ATP synthase, H+ transporting, mitochondrial F0 complex, subunit c (subunit 9), isoform 1	0.000722278	0.046111
H3087D09	Mm.27651	BC030932	cDNA sequence BC030932	0.000722798	0.045966
H3118H07	Mm.23492	Ccnl2	cyclin L2	0.000724957	0.045926
H3064A07	Mm.229107		Mus musculus adult male liver tumor cDNA, RIKEN full-length enriched library, clone:C730018N17 product:unknown EST, full insert sequence	0.000733203	0.0462704
H3042H04	Mm.296868	Rpl27a	ribosomal protein L27a	0.000736635	0.0463096
H3140D07	Mm.29821	Prdx3	peroxiredoxin 3	0.000740443	0.046372
H3136C02	Mm.289791	1110001A23Rik	RIKEN cDNA 1110001A23 gene	0.000741819	0.0462822
H3081E07	Mm.40370	Ssa2	Sjogren syndrome antigen A2	0.000743492	0.0462116
H3001C02	Mm.28661	1110014J05Rik	RIKEN cDNA 1110014J05 gene	0.000750395	0.0464653
H3112G01	Mm.5291	Rps5	ribosomal protein S5	0.00075064	0.0463063
H3031G07	Mm.240619	Ccdc2	coiled-coil domain containing 2	0.000758852	0.0466382
P454	Mm.606	Gata3	GATA binding protein 3	0.000762112	0.0466645
H3153E04	Mm.27026	Clgn	calmegin	0.000767869	0.0468429
H3130D04	Mm.291471	Tomm20	translocase of outer mitochondrial membrane 20 homolog (yeast)	0.000770931	0.0468561
H3089H03	Mm.173291		Mus musculus transcribed sequences	0.000775168	0.0469404
H3104G04	Mm.182328		Mus musculus transcribed sequence with moderate similarity to protein sp:Q9Y3D8 (H.sapiens) CGD7_HUMAN Protein CGI-137 (Protein AD-004)	0.000781703	0.0471628
H3040H10	Mm.253142	Ndufs4	NADH dehydrogenase (ubiquinone) Fe-S protein 4	0.000792467	0.0476377
H3141E06	Mm.29058	Sra1	steroid receptor RNA activator 1	0.000793289	0.0475137
H3097C07	Mm.132868	Rbbp5	retinoblastoma binding protein 5	0.000794459	0.0474113
H3078B10	Mm.297079		Mus musculus transcribed sequence with weak similarity to protein sp:P00722 (E. coli) BGAL_ECOLI Beta-galactosidase (Lactase)	0.000797312	0.0474098
H3019H04	Mm.151168	1500004D14Rik	RIKEN cDNA 1500004D14 gene	0.000799445	0.0473657
H3003F05	Mm.8856	Neu1	neuraminidase 1	0.000806877	0.0476347
H3081H07	Mm.28354	2010305A19Rik	RIKEN cDNA 2010305A19 gene	0.000811841	0.0477565
H3047F01	Mm.155638		Mus musculus similar to CDNA sequence BC023106 (LOC383092), mRNA	0.000813322	0.0476734
T389	Mm.195451	Gosr2	golgi SNAP receptor complex member 2	0.000814344	0.047564
H3104H06	Mm.784	Nbr1	neighbor of Brca1 gene 1	0.000815317	0.0474526
H3029C05	Mm.1893	1810004I06Rik	RIKEN cDNA 1810004I06 gene	0.00081974	0.047542
H3016A02	Mm.368	Psmb4	proteasome (prosome, macropain) subunit, beta type 4	0.000821372	0.0474696
H3099F09	Mm.139314	Dppa5	developmental pluripotency associated 5	0.000826217	0.0475826
H3053F05			EST	0.000831781	0.0477361
H3097A02	Mm.286830	Lap3	leucine aminopeptidase 3	0.000862826	0.0493459
H3029B06	Mm.22511	2310004I24Rik	RIKEN cDNA 2310004I24 gene	0.000863657	0.0492225
H3141D07	Mm.197509	1700123O20Rik	RIKEN cDNA 1700123O20 gene	0.00086446	0.0490983
H3103E07	Mm.254898		Mus musculus adult male aorta and vein cDNA, RIKEN full-length enriched library, clone:A530030G13 product:unknown EST, full insert sequence	0.000867043	0.0490758
H3044H03			EST	0.000872361	0.0492077
H3081H10	Mm.103949	Snrp1c	U1 small nuclear ribonucleoprotein 1C	0.000874065	0.0491356
H3093G10	Mm.26073		Mus musculus transcribed sequences	0.000878701	0.0492282
H3109B02	Mm.157426	0610007H07Rik	RIKEN cDNA 0610007H07 gene	0.000880357	0.0491538
H3038F10			EST	0.000880415	0.0489909
H3147E11	Mm.275010	Ptprf	protein tyrosine phosphatase, receptor type, F	0.000886423	0.0491592
H3006C04	Mm.22353	1810029F08Rik	RIKEN cDNA 1810029F08 gene	0.000897014	0.0495796
H3100G04			EST	0.000898566	0.0494993
H3158G06	Mm.24477	D14Wsu89e	DNA segment, Chr 14, Wayne State University 89, expressed	0.000898814	0.0493479
P117	Mm.121265	Psma1	proteasome (prosome, macropain) subunit, alpha type 1	0.000902543	0.049388
H3009C02	Mm.86564	AA591032	expressed sequence AA591032	0.00091866	0.0501035
H3089C12	Mm.4615	Dlgh3	discs, large homolog 3 (Drosophila)	0.000920539	0.0500403
H3139G05	Mm.245092	AI987944	expressed sequence AI987944	0.000927897	0.0502743
H3096E01	Mm.30118	Gcn5l1	GCN5 general control of amino acid synthesis-like 1 (yeast)	0.000927986	0.0501143
H3114F10	Mm.21646	4933411B03Rik	RIKEN cDNA 4933411B03 gene	0.000928285	0.0499666
H3041D09	Mm.1103		Mus musculus similar to NADH dehydrogenase (LOC230075), mRNA	0.000930772	0.0499373
H3140F01	Mm.28895	1110038B12Rik	RIKEN cDNA 1110038B12 gene	0.000931956	0.0498384
H3090H10	Mm.239247	Asph	aspartate-beta-hydroxylase	0.000933399	0.0497541
H3135B07	Mm.29723		Mus musculus 10, 11 days embryo whole body cDNA, RIKEN full-length enriched library, clone:2810001A02 product:unknown EST, full insert sequence	0.000935725	0.0497172
H3105A10	Mm.249016	Mccc1	methylcrotonoyl-Coenzyme A carboxylase 1 (alpha)	0.000939643	0.0497648
H3089G07	Mm.293175	A630082K20Rik	RIKEN cDNA A630082K20 gene	0.00094236	0.0497488
H3133H07	Mm.227704	Vdac3	voltage-dependent anion channel 3	0.000943713	0.049661
H3088E05	Mm.1114	Gla	galactosidase, alpha	0.000944413	0.0495396
H3029E09			EST	0.000948641	0.0496034
T378	Mm.8681	Ptpn11	protein tyrosine phosphatase, non-receptor type 11	0.000966244	0.0503639
H3156G06	Mm.27913	2610016F04Rik	RIKEN cDNA 2610016F04 gene	0.000975972	0.0507105
H3133H11	Mm.272185	F830029L24Rik	RIKEN cDNA F830029L24 gene	0.000977446	0.0506274
H3032D05	Mm.19082	Xrcc3	X-ray repair complementing defective repair in Chinese hamster cells 3	0.000986807	0.0509521
H3021C06	Mm.23185	2610510J17Rik	RIKEN cDNA 2610510J17 gene	0.000988148	0.0508618
H3004B04	Mm.27054	AI464131	expressed sequence AI464131	0.000990181	0.0508077
T337	Mm.275831	Aldo1	aldolase 1, A isoform	0.000991421	0.0507133
H3106H03	Mm.18742	Nupr1	nuclear protein 1	0.00099208	0.0505899
P044	Mm.28659	Pes1	pescadillo homolog 1, containing BRCT domain (zebrafish)	0.000993231	0.0504923
H3043E02	Mm.32415	Mint	Msx2 interacting nuclear target protein	0.000996555	0.0505054
H3082B03	Mm.247544	Mylk	myosin, light polypeptide kinase	0.00099783	0.0504149
H3012D01	Mm.252982	Mrps9	mitochondrial ribosomal protein S9	0.00100231	0.0504865
H3156B02	Mm.248772	1810027O10Rik	RIKEN cDNA 1810027O10 gene	0.00100344	0.0503894
H3022G07	Mm.43831	Lgals1	lectin, galactose binding, soluble 1	0.00100737	0.0504326
H3011D09	Mm.30072	Cox7a2l	cytochrome c oxidase subunit VIIa polypeptide 2-like	0.0010134	0.0505808
H3020D11	Mm.8294	Vbp1	von Hippel-Lindau binding protein 1	0.00102182	0.0508473
H3062D09	Mm.173505		Mus musculus transcribed sequences	0.00103083	0.0511411
H3088E06	Mm.256185	2810021O14Rik	RIKEN cDNA 2810021O14 gene	0.00103332	0.0511104
H3020F12	Mm.258547	Mtf1	metal response element binding transcription factor 1	0.00103474	0.0510276
H3044E11	Mm.37962	Xpot	exportin, tRNA (nuclear export receptor for tRNAs)	0.00103607	0.0509409
H3134E04			EST	0.0010454	0.0512461
T399	Mm.283278	Napa	N-ethylmaleimide sensitive fusion protein attachment protein alpha	0.00106995	0.0522943
H3011B02	Mm.117541	H2afz	H2A histone family, member Z	0.00107158	0.0522189
H3119B01			EST	0.00107172	0.0520715
H3028G11	Mm.286285	Jade1	Jade1 PHD finger protein	0.00107227	0.0519451
H3021B08	Mm.277304	Tce4	T-complex expressed gene 4	0.00107399	0.0518759
H3116A03	Mm.297514	Rpl10a	ribosomal protein L10A	0.00107458	0.0517524
H3106E04	Mm.18803	Timm22	translocase of inner mitochondrial membrane 22 homolog (yeast)	0.00108763	0.0522282
H3119A04	Mm.298084	Atp5g1	ATP synthase, H+ transporting, mitochondrial F0 complex, subunit c (subunit 9), isoform 1	0.00108869	0.0521272
T027	Mm.29845	Suclg1	succinate-CoA ligase, GDP-forming, alpha subunit	0.00109445	0.0522511
H3084H10	Mm.23998	9430020E02Rik	RIKEN cDNA 9430020E02 gene	0.00110092	0.0524081
H3138E01	Mm.18072	Crcp	calcitonin gene-related peptide-receptor component protein	0.00110513	0.0524571
H3015D02	Mm.25161	Sirt2	sirtuin 2 (silent mating type information regulation 2, homolog) 2 (S. cerevisiae)	0.00111025	0.0525487
H3014E11	Mm.146001	AW123240	expressed sequence AW123240	0.00111813	0.0527701
H3042H05	Mm.308756		Mus musculus BALB/c 3T3mou non-muscle alpha-actinin (FR-17) mRNA, partial cds.	0.00113114	0.0532312
H3038G03	Mm.294983	2610020P18Rik	RIKEN cDNA 2610020P18 gene	0.00113914	0.0534552
H3158F02	Mm.158264	Pfdn5	prefoldin 5	0.00114378	0.0535206
H3133B04	Mm.252156	Tcf20	transcription factor 20	0.00115087	0.0536996
H3151A08	Mm.41580	Rab3b	RAB3B, member RAS oncogene family	0.00115645	0.0538075
H3038A08	Mm.314173		Mus musculus transcribed sequence with weak similarity to protein ref:NP_006092.1 (H.sapiens) highly expressed in cancer, rich in leucine heptad repeats [Homo sapiens]	0.00116245	0.0539344
H3053B03	Mm.291799	Rdh11	retinol dehydrogenase 11	0.00116653	0.0539716
H3091E05	Mm.272541	2410002O22Rik	RIKEN cDNA 2410002O22 gene	0.00117488	0.0542059
H3013A12	Mm.165079	Crry	complement receptor related protein	0.00117493	0.0540566
H3005H08	Mm.4141	Vldlr	very low density lipoprotein receptor	0.00117771	0.0540334
H3144E11	Mm.27762	1110014D18Rik	RIKEN cDNA 1110014D18 gene	0.0011788	0.0539334
H3084E12	Mm.246869	8430423A01Rik	RIKEN cDNA 8430423A01 gene	0.00118407	0.0540243
H3088B06	Mm.36835	5133400G04Rik	RIKEN cDNA 5133400G04 gene	0.0011996	0.054582
H3144A02	Mm.26614	Mrpl30	mitochondrial ribosomal protein L30	0.00120012	0.054455
H3139D12	Mm.249479	Dncic2	dynein, cytoplasmic, intermediate chain 2	0.00120074	0.0543334
H3070B01	Mm.3774	2610005H11Rik	RIKEN cDNA 2610005H11 gene	0.00120286	0.0542804
H3136B04	Mm.272687	0610009H04Rik	RIKEN cDNA 0610009H04 gene	0.00120845	0.0543833
H3137D04	Mm.311886		Mus musculus transcribed sequences	0.00121561	0.0545568
H3154D05	Mm.29253	2310032N20Rik	RIKEN cDNA 2310032N20 gene	0.00121695	0.0544683
H3126B10	Mm.44220	Tmem4	transmembrane protein 4	0.00121988	0.0544515
H3032C01	Mm.35389		Mus musculus transcribed sequences	0.00122824	0.0546765
H3132D07	Mm.247039	6030432N09Rik	RIKEN cDNA 6030432N09 gene	0.00123073	0.0546397
H3140F09	Mm.250335	2010203J19Rik	RIKEN cDNA 2010203J19 gene	0.00123438	0.0546546
H3017E06	Mm.39265	0610010K14Rik	RIKEN cDNA 0610010K14 gene	0.00123822	0.0546776
H3006D02	Mm.30866		Mus musculus transcribed sequences	0.00124247	0.0547187
H3037B04	Mm.320442		Mus musculus transcribed sequence with strong similarity to protein ref:NP_005265.1 (H.sapiens) guanine nucleotide binding protein (G protein), gamma 5 [Homo sapiens]	0.00124395	0.0546376
T018	Mm.41502	Fh1	fumarate hydratase 1	0.00124608	0.0545854
H3112G05	Mm.5291	Rps5	ribosomal protein S5	0.00124618	0.0544452
H3031A02	Mm.5305	Gnb2-rs1	guanine nucleotide binding protein, beta 2, related sequence 1	0.00124785	0.054374
H3078H02	Mm.266312	Zrf2	zuotin related factor 2	0.00125081	0.0543589
H3119A08	Mm.290412	Clic1	chloride intracellular channel 1	0.00125994	0.0546116
H3010F09	Mm.275943	2610529C04Rik	RIKEN cDNA 2610529C04 gene	0.00126478	0.0546777
H3147E07	Mm.221688	Phip	pleckstrin homology domain interacting protein	0.0012653	0.054557
H3157C09	Mm.281379	Casp6	caspase 6	0.00127278	0.0547362
H3097A03	Mm.2136	Cox4i1	cytochrome c oxidase subunit IV isoform 1	0.00127705	0.0547769
H3137B01	Mm.209071	Hdh	Huntington disease gene homolog	0.00128231	0.0548596
H3058F11	Mm.251155	2610510D14Rik	RIKEN cDNA 2610510D14 gene	0.00128322	0.0547565
H3098H08	Mm.211471		Mus musculus transcribed sequences	0.00128386	0.054642
H3095B01	Mm.26101	D430039N05Rik	RIKEN cDNA D430039N05 gene	0.00129131	0.0548173
H3043C11			EST	0.00129393	0.0547873
H3008C02	Mm.267692	Txnl2	thioredoxin-like 2	0.00129869	0.054848
H3088B01	Mm.155696	Bet1l	blocked early in transport 1 homolog (S. cerevisiae)-like	0.00131389	0.0553479
H3001H04	Mm.28696	Fntb	farnesyltransferase, CAAX box, beta	0.00131455	0.0552344
T293	Mm.18517	Rasa3	RAS p21 protein activator 3	0.00132632	0.0555874
H3005C03	Mm.74084	BC028768	cDNA sequence BC028768	0.00132834	0.0555306
H3098B03	Mm.29098	A530057M15Rik	RIKEN cDNA A530057M15 gene	0.00132892	0.0554142
H3081H12	Mm.247077	Ormdl2	ORM1-like 2 (S. cerevisiae)	0.00133673	0.0555991
H3100B10			EST	0.00133752	0.0554919
H3136G06	Mm.180458	Rpl13a	ribosomal protein L13a	0.00133943	0.0554314
H3009A10	Mm.167218		Mus musculus transcribed sequences	0.00134372	0.0554698
H3007C04	Mm.84203	1810042K04Rik	RIKEN cDNA 1810042K04 gene	0.00134593	0.0554219
H3073E02	Mm.6856	Pttg1	pituitary tumor-transforming 1	0.00134784	0.0553624
H3108A09	Mm.146901	B230307C21	hypothetical protein B230307C21	0.00135126	0.0553649
H3098G12	Mm.288195	1700088E04Rik	RIKEN cDNA 1700088E04 gene	0.00135333	0.0553118
H3027E06	Mm.62876	D10Ertd749e	DNA segment, Chr 10, ERATO Doi 749, expressed	0.00138815	0.0565946
T398	Mm.6874	Surf1	surfeit gene 1	0.00140138	0.056993
H3112G04	Mm.5291	Rps5	ribosomal protein S5	0.00140493	0.0569965
H3147G07	Mm.41865	Lsm10	U7 snRNP-specific Sm-like protein LSM10	0.00140839	0.0569965
H3039E11	Mm.5697		Mus musculus 0 day neonate lung cDNA, RIKEN full-length enriched library, clone:E030006G18 product:unknown EST, full insert sequence	0.00141808	0.0572482
H3020B12	Mm.261602	Hic2	hypermethylated in cancer 2	0.00142238	0.0572813
H3057B07	Mm.25613	Ier3	immediate early response 3	0.00143231	0.0575406
H3080A05			EST	0.00143337	0.057443
H3030E02	Mm.291793	Gabarapl2	GABA(A) receptor-associated protein like 2	0.00144172	0.0576375
H3052B09	Mm.275334	Sp100	nuclear antigen Sp100	0.00144266	0.0575353
T133	Mm.136093	Atp5k	ATP synthase, H+ transporting, mitochondrial F1F0 complex, subunit e	0.00144477	0.05748
H3072F07	Mm.173763		Mus musculus transcribed sequences	0.00145925	0.0579163
H3024F10	Mm.188105	2300006M17Rik	RIKEN cDNA 2300006M17 gene	0.00147333	0.0583345
T140	Mm.281379	Casp6	caspase 6	0.00147374	0.0582111
H3079D02	Mm.52809	1810059A23Rik	RIKEN cDNA 1810059A23 gene	0.00147386	0.0580764
H3110C01	Mm.28217	Epb4.1l4b	erythrocyte protein band 4.1-like 4b	0.00148316	0.0583034
H3103D12	Mm.44490	6330415M09Rik	RIKEN cDNA 6330415M09 gene	0.00149454	0.058611
H3081G12	Mm.29960	AI326906	expressed sequence AI326906	0.00149567	0.058516
H3100G07	Mm.280544	Ddx52	DEAD (Asp-Glu-Ala-Asp) box polypeptide 52	0.00149795	0.0584662
H3024E04	Mm.281367	Cdc2a	cell division cycle 2 homolog A (S. pombe)	0.00151758	0.0590924
H3095D05			EST	0.00152902	0.0593974
H3077D11	Mm.4896	Polr2j	polymerase (RNA) II (DNA directed) polypeptide J	0.00153174	0.0593632
H3001D11	Mm.28679	0610007P06Rik	RIKEN cDNA 0610007P06 gene	0.00153493	0.0593472
H3159A09	Mm.177117	2900011O08Rik	RIKEN cDNA 2900011O08 gene	0.00153724	0.059297
H3019G08	Mm.44223	D5Buc26e	DNA segment, Chr 5, Bucan 26 expressed	0.00154382	0.0594118
H3036H06	Mm.52809	1810059A23Rik	RIKEN cDNA 1810059A23 gene	0.00154482	0.0593119
H3141A04	Mm.3746	Naca	nascent polypeptide-associated complex alpha polypeptide	0.00154518	0.0591877
H3134C04	Mm.103032		Mus musculus transcribed sequences	0.00154828	0.0591687
H3099E02	Mm.9199	Pole2	polymerase (DNA directed), epsilon 2 (p59 subunit)	0.00155307	0.0592142
H3106G03	Mm.22351	2410018G20Rik	RIKEN cDNA 2410018G20 gene	0.00155604	0.0591908
H3099D02	Mm.27951	1810015M01Rik	RIKEN cDNA 1810015M01 gene	0.00156261	0.0593036
T230	Mm.25613	Ier3	immediate early response 3	0.00156466	0.0592448
H3122F11	Mm.22786	Trim32	tripartite motif protein 32	0.00157876	0.0596416
H3096A04	Mm.272847	2410004D18Rik	RIKEN cDNA 2410004D18 gene	0.00159074	0.0599569
H3138B12	Mm.289796	2700083B01Rik	RIKEN cDNA 2700083B01 gene	0.00159328	0.0599152
H3091E10	Mm.18742	Nupr1	nuclear protein 1	0.00159943	0.0600095
H3146E01	Mm.2870	Rpa2	replication protein A2	0.00160571	0.0601082
T045	Mm.19039	Got1	glutamate oxaloacetate transaminase 1, soluble	0.00160659	0.0600048
T353			EST	0.00161124	0.0600425
H3105H12	Mm.35353	Sip1	survivor of motor neuron protein interacting protein 1	0.00162143	0.0602859
H3050B11	Mm.142132	Timm9	translocase of inner mitochondrial membrane 9 homolog (yeast)	0.00164174	0.0609032
H3084H09	Mm.6856	Pttg1	pituitary tumor-transforming 1	0.00164538	0.0609013
H3136B02	Mm.22117	Polr2g	polymerase (RNA) II (DNA directed) polypeptide G	0.00165075	0.0609631
H3144E12	Mm.179155		Mus musculus adult male testis cDNA, RIKEN full-length enriched library, clone:4930439F07 product:unknown EST, full insert sequence	0.00165871	0.0611199
H3114C12	Mm.301331	Rps13	ribosomal protein S13	0.00166965	0.0613857
H3123F12	Mm.157190	Hmga2	high mobility group AT-hook 2	0.00167051	0.0612805
H3013G11	Mm.283968	Pdlim2	PDZ and LIM domain 2	0.00167056	0.0611462
H3152B10	Mm.291471	Tomm20	translocase of outer mitochondrial membrane 20 homolog (yeast)	0.00168535	0.0615509
H3019D09	Mm.425	Hint	histidine triad nucleotide binding protein	0.0016884	0.0615257
H3135G03	Mm.252210	Serpinb6a	serine (or cysteine) proteinase inhibitor, clade B, member 6a	0.00169804	0.0617406
T361			EST	0.00170703	0.0619308
H3030C06	Mm.1260	Nme1	expressed in non-metastatic cells 1, protein	0.00170739	0.0618074
H3012C05	Mm.279437	Cfdp	craniofacial development protein 1	0.00171134	0.0618145
H3080A11	Mm.4426		Mus musculus transcribed sequence with moderate similarity to protein sp:P08962 (H.sapiens) CD63_HUMAN CD63 antigen (Melanoma-associated antigen ME491) (Lysosome-associated membrane glycoprotein 3) (LAMP-3) (Ocular melanoma-associated antigen) (OMA81H) (Granulophysin)	0.0017133	0.0617499
H3028G12	Mm.189116	1700023B02Rik	RIKEN cDNA 1700023B02 gene	0.00171609	0.0617154
H3044H01	Mm.287443	Mrps18a	mitochondrial ribosomal protein S18A	0.00171611	0.0615817
H3106C01			EST	0.00171878	0.0615434
H3120C08	Mm.289810	3100001N19Rik	RIKEN cDNA 3100001N19 gene	0.0017278	0.0617323
H3093D12	Mm.297571		Mus musculus, Similar to hypothetical protein FLJ21610, clone IMAGE:5150298, mRNA, partial cds	0.00172898	0.0616407
H3075E01	Mm.28240	Snx6	sorting nexin 6	0.00173463	0.0617088
H3046F11	Mm.280083	2010004J23Rik	RIKEN cDNA 2010004J23 gene	0.00174075	0.0617929
H3017D01	Mm.38173	6030457N17Rik	RIKEN cDNA 6030457N17 gene	0.00174425	0.0617839
H3117G12	Mm.19844	Alox5ap	arachidonate 5-lipoxygenase activating protein	0.00176927	0.0625356
H3043G10	Mm.22362	H47	histocompatibility 47	0.00177917	0.062751
H3049C02	Mm.286488	Kif22	kinesin family member 22	0.00178251	0.0627345
H3088C12	Mm.34405	Casp3	caspase 3, apoptosis related cysteine protease	0.00179119	0.0629055
H3082B11	Mm.28319	BC046518	cDNA sequence BC046518	0.0017992	0.0630525
H3039H05	Mm.166319	1110001A16Rik	RIKEN cDNA 1110001A16 gene	0.0018025	0.0630338
H3076G01	Mm.45092	4921507I02Rik	RIKEN cDNA 4921507I02 gene	0.00180944	0.0631427
H3136G01	Mm.200499	Jtv1	JTV1 gene	0.00181076	0.063055
H3144C12	Mm.295801		Mus musculus similar to hypothetical protein FLJ20729 (LOC229937), mRNA	0.00183063	0.0636123
H3119A12	Mm.29105	Gtf3a	general transcription factor III A	0.00183064	0.0634789
H3075E08	Mm.51049	1110021E09Rik	RIKEN cDNA 1110021E09 gene	0.0018324	0.0634063
P086	Mm.21535	Grpel1	GrpE-like 1, mitochondrial	0.00183485	0.063358
H3151H11	Mm.271973	Ell	elongation factor RNA polymerase II	0.00184119	0.0634439
H3112H03	Mm.182595		Mus musculus transcribed sequences	0.00184133	0.0633163
P494	Mm.1410	Il18	interleukin 18	0.00184573	0.0633355
H3105F09	Mm.222272	Clasp2	CLIP associating protein 2	0.00186819	0.0639727
H3049E04	Mm.606	Gata3	GATA binding protein 3	0.0018687	0.0638577
H3148B12	Mm.302452		Mus musculus transcribed sequences	0.0018946	0.0646087
H3045A05	Mm.181237	Rnaset2	ribonuclease T2	0.00189597	0.0645216
H3008H10	Mm.38390	Cpne3	copine III	0.00190123	0.0645674
H3013B04	Mm.24576	B230106I24Rik	RIKEN cDNA B230106I24 gene	0.00190737	0.0646427
H3021A02	Mm.24254	Pdcd6	programmed cell death 6	0.00191567	0.0647905
P263	Mm.158264	Pfdn5	prefoldin 5	0.00192621	0.0650134
P555	Mm.86386	Dffb	DNA fragmentation factor, beta subunit	0.0019293	0.0649848
H3028B11	Mm.259667	Rbms1	RNA binding motif, single stranded interacting protein 1	0.00193569	0.0650668
H3002G02	Mm.218434	1810034M08Rik	RIKEN cDNA 1810034M08 gene	0.00193758	0.0649977
H3096G08	Mm.260521	Pik3ca	phosphatidylinositol 3-kinase, catalytic, alpha polypeptide	0.00193864	0.064901
H3037D09	Mm.208061	2610017G09Rik	RIKEN cDNA 2610017G09 gene	0.00194385	0.0649435
H3005D07			EST	0.00195107	0.0650528
H3137D05			EST	0.00195157	0.0649382
H3159B09			EST	0.00195823	0.0650282
H3014B05	Mm.260773		Mus musculus similar to hypothetical protein FLJ32468 (LOC231891), mRNA	0.00196635	0.0651666
H3133D06	Mm.21535	Grpel1	GrpE-like 1, mitochondrial	0.00198265	0.0655747
H3115B01	Mm.45028		Mus musculus 0 day neonate cerebellum cDNA, RIKEN full-length enriched library, clone:C230060L03 product:unknown EST, full insert sequence	0.00198862	0.0656404
H3128E03	Mm.282081	1110019J04Rik	RIKEN cDNA 1110019J04 gene	0.0019914	0.0656006
H3152A02	Mm.213222	St6gal1	beta galactoside alpha 2,6 sialyltransferase 1	0.00199719	0.0656601
H3027D10	Mm.5305	Gnb2-rs1	guanine nucleotide binding protein, beta 2, related sequence 1	0.00199752	0.0655401
H3111F10	Mm.17436	Trim37	tripartite motif protein 37	0.00200526	0.0656631
P301	Mm.298306	Rpl29	ribosomal protein L29	0.00200593	0.0655549
H3126D12	Mm.34706	AI447928	expressed sequence AI447928	0.00200954	0.0655428
H3077G01	Mm.24603	2310051D06Rik	RIKEN cDNA 2310051D06 gene	0.00201346	0.0655409
H3025H01	Mm.2948	H2-Ke2	H2-K region expressed gene 2	0.00202296	0.0657201
H3021H01	Mm.41622	2810014D17Rik	RIKEN cDNA 2810014D17 gene	0.00202498	0.0656564
H3016C10	Mm.296383	Hspca	heat shock protein 1, alpha	0.00203655	0.0659019
H3158D02	Mm.29150	Tcte1l	t-complex-associated-testis-expressed 1-like	0.00204073	0.0659076
H3082E02	Mm.292650	Set	SET translocation	0.00204526	0.0659247
H3019E12	Mm.182042	Atp5h	ATP synthase, H+ transporting, mitochondrial F0 complex, subunit d	0.00206048	0.0662855
H3152A09	Mm.10954	BC032200	cDNA sequence BC032200	0.00206698	0.0663651
H3120A12	Mm.289082	Wdr26	WD repeat domain 26	0.00207012	0.0663365
H3124F04	Mm.14796	Mgst1	microsomal glutathione S-transferase 1	0.00208563	0.0667036
H3025C10	Mm.30005	1110021D01Rik	RIKEN cDNA 1110021D01 gene	0.00208704	0.0666196
P605	Mm.29020	Cdkn2d	cyclin-dependent kinase inhibitor 2D (p19, inhibits CDK4)	0.00209421	0.0667191
H3021D09	Mm.240668	2310004K06Rik	RIKEN cDNA 2310004K06 gene	0.00210296	0.0668684
H3028F04	Mm.930	Ctsl	cathepsin L	0.00210538	0.0668164
H3156A07	Mm.12951	Nme6	expressed in non-metastatic cells 6, protein	0.00210669	0.0667293
H3108A10	Mm.259121	2700082D03Rik	RIKEN cDNA 2700082D03 gene	0.00212583	0.0672064
H3116F10	Mm.229404		Mus musculus transcribed sequence with weak similarity to protein pir:I58401 (M.musculus) I58401 protein-tyrosine kinase (EC 2.7.1.112) JAK3 - mouse	0.00212617	0.0670884
T338	Mm.255848	Hk2	hexokinase 2	0.00213211	0.0671471
H3030C07	Mm.20872	Large	like-glycosyltransferase	0.00214003	0.067268
H3013G10	Mm.8552	Birc5	baculoviral IAP repeat-containing 5	0.00214499	0.0672955
H3106C03			EST	0.0021541	0.0674528
H3112E03			EST	0.00215464	0.0673417
H3006E11	Mm.21964	D11Ertd530e	DNA segment, Chr 11, ERATO Doi 530, expressed	0.00216165	0.0674329
H3108H05	Mm.33614		Mus musculus 0 day neonate head cDNA, RIKEN full-length enriched library, clone:4833426J09 product:unknown EST, full insert sequence	0.00216926	0.0675424
H3102E06	Mm.12915	Nit1	nitrilase 1	0.00218238	0.0678226
H3129E12	Mm.271950	Gorasp2	golgi reassembly stacking protein 2	0.0021984	0.0681917
H3026F12	Mm.221322	Nr6a1	nuclear receptor subfamily 6, group A, member 1	0.00221408	0.0685492
P628	Mm.291743	Dci	dodecenoyl-Coenzyme A delta isomerase (3,2 trans-enoyl-Coenyme A isomerase)	0.00221486	0.0684446
H3032E09	Mm.261691	1810020G14Rik	RIKEN cDNA 1810020G14 gene	0.00222185	0.0685321
H3146B07	Mm.103634	Rps19	ribosomal protein S19	0.00224209	0.0690272
H3004G11	Mm.298306	Rpl29	ribosomal protein L29	0.00224352	0.0689423
H3137G12	Mm.80710		Mus musculus transcribed sequences	0.0022583	0.0692672
P924	Mm.280029	Hes6	hairy and enhancer of split 6 (Drosophila)	0.00228335	0.0699052
H3118C01	Mm.133551	Atp5j2	ATP synthase, H+ transporting, mitochondrial F0 complex, subunit f, isoform 2	0.00229386	0.0700967
H3114A05	Mm.297465		Mus musculus similar to Phospholipid hydroperoxide glutathione peroxidase, mitochondrial precursor (PHGPx) (GPX-4) (LOC380677), mRNA	0.00229453	0.0699873
T142	Mm.1626	Tnfrsf6	tumor necrosis factor receptor superfamily, member 6	0.00229748	0.0699478
H3006B02	Mm.27853	D7Wsu180e	DNA segment, Chr 7, Wayne State University 180, expressed	0.00231299	0.07029
H3059E05	Mm.212703	Mor2	malate dehydrogenase, soluble	0.00231303	0.0701619
H3023F05	Mm.100644		Mus musculus 0 day neonate cerebellum cDNA, RIKEN full-length enriched library, clone:C230012J03 product:unknown EST, full insert sequence	0.00233962	0.0708379
H3098G09	Mm.5291	Rps5	ribosomal protein S5	0.00234474	0.0708628
H3035B01	Mm.276018	Ifld2	induced in fatty liver dystrophy 2	0.0023448	0.0707347
H3088E12	Mm.256588		Mus musculus similar to hypothetical protein (LOC381737), mRNA	0.00234623	0.0706485
H3156H10	Mm.29054	2610529I12Rik	RIKEN cDNA 2610529I12 gene	0.002356	0.0708133
H3141C07	Mm.18561	Cyhr1	cysteine and histidine rich 1	0.00237568	0.0712747
H3096E04			EST	0.00238781	0.0715085
H3135A10	Mm.319259		Mus musculus transcribed sequence with moderate similarity to protein pir:S12207 (M.musculus) S12207 hypothetical protein (B2 element) - mouse	0.002389	0.0714142
H3019A07	Mm.318180	AI098020	expressed sequence AI098020	0.00240107	0.071645
P431	Mm.1626	Tnfrsf6	tumor necrosis factor receptor superfamily, member 6	0.00240572	0.0716538
H3016E10	Mm.168257	Arhu	ras homolog gene family, member U	0.00241411	0.071774
H3104C03	Mm.274301	1500015O10Rik	RIKEN cDNA 1500015O10 gene	0.0024153	0.0716801
P457	Mm.258280	Gdf1	growth differentiation factor 1	0.00241884	0.0716561
H3012H02	Mm.24886	4833420N02Rik	RIKEN cDNA 4833420N02 gene	0.00242578	0.0717326
T384	Mm.10707	Ppargc1	peroxisome proliferative activated receptor, gamma, coactivator 1	0.00243231	0.0717966
H3100H10	Mm.31598	2310009E07Rik	RIKEN cDNA 2310009E07 gene	0.0024463	0.0720805
H3157H07	Mm.177991	0610010I12Rik	RIKEN cDNA 0610010I12 gene	0.00245229	0.0721281
H3149D03	Mm.14825	Idh3g	isocitrate dehydrogenase 3 (NAD+), gamma	0.0024672	0.0724372
H3129D05	Mm.251904	Nudt5	nudix (nucleoside diphosphate linked moiety X)-type motif 5	0.00247303	0.0724791
H3101B06	Mm.41417	Glmn	glomulin, FKBP associated protein	0.00248243	0.0726253
H3060F12	Mm.275981	2810012K13Rik	RIKEN cDNA 2810012K13 gene	0.00248371	0.072534
H3055D06			EST	0.00248449	0.0724284
H3025D08	Mm.86453	Aebp2	AE binding protein 2	0.00249176	0.0725119
H3063F10			EST	0.0025012	0.0726583
P824	Mm.87787	Lta	lymphotoxin A	0.00252237	0.0731444
H3009B08	Mm.168680	Mrps23	mitochondrial ribosomal protein S23	0.00252571	0.0731123
H3101D07	Mm.187079	A930006D20Rik	RIKEN cDNA A930006D20 gene	0.00252935	0.0730893
P554	Mm.9474	Twist2	twist homolog 2 (Drosophila)	0.00253838	0.0732217
H3120D10	Mm.66	Rps4x	ribosomal protein S4, X-linked	0.00255137	0.0734677
H3021C11	Mm.290027	Ncbp2	nuclear cap binding protein subunit 2	0.0025595	0.0735732
T387	Mm.20931	Gosr1	golgi SNAP receptor complex member 1	0.00256318	0.0735509
H3157D09	Mm.288689	1110055A02Rik	RIKEN cDNA 1110055A02 gene	0.0025637	0.0734379
H3133B12	Mm.317829		Mus musculus transcribed sequences	0.00256512	0.073351
H3105H08			EST	0.00256662	0.0732665
H3102G04	Mm.261329	1500001M02Rik	RIKEN cDNA 1500001M02 gene	0.00256864	0.0731974
H3012H10			EST	0.00257873	0.0733578
P647	Mm.14297	Nr2f1	nuclear receptor subfamily 2, group F, member 1	0.00258459	0.0733978
H3019F07	Mm.8235	Stk10	serine/threonine kinase 10	0.00259865	0.0736702
H3007C09	Mm.22240	Sh3bgrl3	SH3 domain binding glutamic acid-rich protein-like 3	0.00260775	0.073801
H3097C09	Mm.227856	Nfia	nuclear factor I/A	0.0026085	0.0736957
H3120F03	Mm.245739	G430055L02Rik	RIKEN cDNA G430055L02 gene	0.00261698	0.0738086
H3119E05	Mm.277857	Cd63	Cd63 antigen	0.00262463	0.073898
H3060E02	Mm.255488	Pcdh7	protocadherin 7	0.00262853	0.0738815
H3008B07	Mm.12677	Atp5c1	ATP synthase, H+ transporting, mitochondrial F1 complex, gamma polypeptide 1	0.00263124	0.0738315
H3111G04	Mm.251655	9430010O03Rik	RIKEN cDNA 9430010O03 gene	0.00264016	0.0739558
H3112A06	Mm.6698	Sara1	SAR1a gene homolog 1 (S. cerevisiae)	0.00264291	0.0739072
P010	Mm.877	Cxcl10	chemokine (C-X-C motif) ligand 10	0.00265191	0.0740332
H3038H12	Mm.233808		Mus musculus transcribed sequence with strong similarity to protein ref:NP_000986.2 (H.sapiens) ribosomal protein L34; 60S ribosomal protein L34 [Homo sapiens]	0.00266314	0.074221
H3013G01	Mm.277449	6720485C15Rik	RIKEN cDNA 6720485C15 gene	0.00266585	0.074171
H3136B08	Mm.6343	Npm1	nucleophosmin 1	0.00266906	0.0741349
H3009C11	Mm.29859	Eif2s2	eukaryotic translation initiation factor 2, subunit 2 (beta)	0.00267345	0.074132
H3023D04	Mm.247985	4930471M23Rik	RIKEN cDNA 4930471M23 gene	0.00268386	0.0742954
H3121B08	Mm.282081	1110019J04Rik	RIKEN cDNA 1110019J04 gene	0.00269167	0.0743866
H3003E01	Mm.300798	Cutl1	cut-like 1 (Drosophila)	0.00270881	0.074735
H3133C09	Mm.262320	D430044G18Rik	RIKEN cDNA D430044G18 gene	0.00270885	0.0746112
H3015H12	Mm.227275	D4Ertd786e	DNA segment, Chr 4, ERATO Doi 786, expressed	0.00272422	0.0749093
P456	Mm.12468	Gbas	glioblastoma amplified sequence	0.00272762	0.0748777
H3012B10			EST	0.00274196	0.075146
H3129H02	Mm.328732		Mus musculus transcribed sequence with moderate similarity to protein ref:NP_002992.1 (H.sapiens) succinate dehydrogenase complex, subunit C precursor; Succinate dehydrogenase complex, subunit C, integral membrane protein,; succinate-ubiquinone oxidoreducatase cytochrome B large subunit [Homo sapiens]	0.00274928	0.0752215
H3099E06	Mm.291581		Mus musculus transcribed sequences	0.00275082	0.075139
H3033G10	Mm.29183	Mrpl2	mitochondrial ribosomal protein L2	0.0027626	0.0753357
H3006B06	Mm.176347	D530033C11Rik	RIKEN cDNA D530033C11 gene	0.00277617	0.0755807
H3139A09	Mm.271784	Psph	phosphoserine phosphatase	0.00278566	0.0757138
H3008H05	Mm.1129	Rps2	ribosomal protein S2	0.00278833	0.0756615
H3112G09	Mm.17708	Atp6v0d1	ATPase, H+ transporting, V0 subunit D isoform 1	0.00279837	0.0758092
H3030A10	Mm.281601	Ddx55	DEAD (Asp-Glu-Ala-Asp) box polypeptide 55	0.00281857	0.076231
H3044E04	Mm.274466	D13Ertd275e	DNA segment, Chr 13, ERATO Doi 275, expressed	0.00282641	0.0763176
H3075F03	Mm.301250		Mus musculus transcribed sequence with weak similarity to protein sp:P09871 (H.sapiens) C1S_HUMAN Complement C1s component precursor (C1 esterase)	0.0028367	0.0764701
H3100G09	Mm.259204	Dpf2	D4, zinc and double PHD fingers family 2	0.00284545	0.0765806
H3109D09	Mm.200783	Ssx2ip	synovial sarcoma, X breakpoint 2 interacting protein	0.00286561	0.0769975
H3120H12	Mm.138320		Mus musculus 12 days embryo spinal cord cDNA, RIKEN full-length enriched library, clone:C530046A11 product:unknown EST, full insert sequence	0.00287052	0.0770037
H3126E12	Mm.327239		Mus musculus transcribed sequences	0.00288024	0.0771388
P748	Mm.30210	Psma6	proteasome (prosome, macropain) subunit, alpha type 6	0.00289088	0.0772982
H3036B09	Mm.87062	Mrps25	mitochondrial ribosomal protein S25	0.00289768	0.0773543
H3038F07	Mm.272264	Stx3	syntaxin 3	0.00290011	0.0772939
H3058B04	Mm.294627	Fbxl11	F-box and leucine-rich repeat protein 11	0.00292615	0.0778619
H3129H10	Mm.59041	2700097O09Rik	RIKEN cDNA 2700097O09 gene	0.00294835	0.0783262
H3158C09	Mm.19073	Map4k4	mitogen-activated protein kinase kinase kinase kinase 4	0.00295867	0.0784738
P590	Mm.20940	Casp14	caspase 14	0.00296888	0.078618
H3155G06	Mm.44220	Tmem4	transmembrane protein 4	0.00297731	0.0787148
H3121H01	Mm.27103		Mus musculus ES cells cDNA, RIKEN full-length enriched library, clone:2410046H18 product:unknown EST, full insert sequence	0.00298673	0.0788371
H3086G01	Mm.148753	DXImx41e	DNA segment, Chr X, Immunex 41, expressed	0.00300389	0.0791634
H3155H01	Mm.301679		Mus musculus transcribed sequence with strong similarity to protein ref:NP_000966.2 (H.sapiens) ribosomal protein L11; 60S ribosomal protein L11 [Homo sapiens]	0.00301508	0.0793312
H3062H11	Mm.8681	Ptpn11	protein tyrosine phosphatase, non-receptor type 11	0.0030201	0.0793366
H3001H11	Mm.173165	0610039G24Rik	RIKEN cDNA 0610039G24 gene	0.00303368	0.0795664
H3024H11			EST	0.00304247	0.0796701
H3143F06	Mm.253403	1810073N04Rik	RIKEN cDNA 1810073N04 gene	0.00304706	0.0796637
H3075A01	Mm.275382		Mus musculus 15 days embryo head cDNA, RIKEN full-length enriched library, clone:D930040F23 product:unknown EST, full insert sequence	0.00305327	0.0796995
H3055B12	Mm.36318		Mus musculus transcribed sequences	0.00305506	0.07962
H3007D10	Mm.274360	Rnf13	ring finger protein 13	0.00306342	0.0797118
H3012F03	Mm.261984	Glo1	glyoxalase 1	0.00307953	0.0800045
H3066B11	Mm.172835	Ube2a	ubiquitin-conjugating enzyme E2A, RAD6 homolog (S. cerevisiae)	0.0030883	0.0801061
H3059F10	Mm.212694		Mus musculus 0 day neonate head cDNA, RIKEN full-length enriched library, clone:4833405L11 product:unknown EST, full insert sequence	0.00310446	0.0803987
H3151G10	Mm.245210	Lrig1	leucine-rich repeats and immunoglobulin-like domains 1	0.00311201	0.0804676
H3030A03	Mm.1777	Hspd1	heat shock protein 1 (chaperonin)	0.00312735	0.0807377
H3013C10			EST	0.00312821	0.0806334
T131	Mm.298102	Cycs	cytochrome c, somatic	0.00313178	0.0805994
H3115C08	Mm.257989	Snrk	SNF related kinase	0.00313237	0.0804888
H3058H07	Mm.27900	1810013D10Rik	RIKEN cDNA 1810013D10 gene	0.00313817	0.0805121
H3024G10	Mm.957	Cops4	COP9 (constitutive photomorphogenic) homolog, subunit 4 (Arabidopsis thaliana)	0.00313955	0.0804224
H3009C12	Mm.270130	Prdx2	peroxiredoxin 2	0.00314198	0.0803595
H3009H10			EST	0.00314463	0.0803027
H3131F09	Mm.212290	A430107J06Rik	RIKEN cDNA A430107J06 gene	0.0031463	0.0802209
H3048B05	Mm.127692	4930472G13Rik	RIKEN cDNA 4930472G13 gene	0.0031578	0.0803896
H3027E05	Mm.4610	Upp1	uridine phosphorylase 1	0.00317385	0.0806736
H3054H08	Mm.21171	1110033O09Rik	RIKEN cDNA 1110033O09 gene	0.00317526	0.0805852
H3111D01	Mm.297541		Mus musculus similar to KIAA1372 protein (LOC244144), mRNA	0.00317648	0.0804921
H3004D12	Mm.1129	Rps2	ribosomal protein S2	0.00319198	0.0807605
H3039E04			EST	0.00319654	0.080752
H3155A09	Mm.22001	Dpm2	dolichol-phosphate (beta-D) mannosyltransferase 2	0.00320165	0.080757
P664	Mm.24038	Gbp2	guanylate nucleotide binding protein 2	0.0032046	0.0807079
H3048C07			EST	0.0032048	0.0805896
H3038G05	Mm.289082	Wdr26	WD repeat domain 26	0.00320751	0.0805349
H3090A12	Mm.11175	425O18-1	hypothetical protein 425O18-1	0.00323172	0.0810194
H3146F09	Mm.260866	5730411O18Rik	RIKEN cDNA 5730411O18 gene	0.0032343	0.0809606
H3120A08	Mm.310835		Mus musculus transcribed sequence with strong similarity to protein sp:P38384 (H.sapiens) S61G_HUMAN Protein transport protein SEC61 gamma subunit	0.00323864	0.0809463
H3061B12	Mm.18706		Mus musculus adult male corpora quadrigemina cDNA, RIKEN full-length enriched library, clone:B230385P13 product:transformed mouse 3T3 cell double minute 4, full insert sequence	0.00323994	0.080856
H3016A11	Mm.289841	2810430M08Rik	RIKEN cDNA 2810430M08 gene	0.00325037	0.0809936
H3107F11	Mm.229761		Mus musculus 11 days pregnant adult female ovary and uterus cDNA, RIKEN full-length enriched library, clone:5031436O03 product:unknown EST, full insert sequence	0.00325276	0.0809308
H3159A01	Mm.6660	Ccl27	chemokine (C-C motif) ligand 27	0.00328066	0.0815018
H3083H06	Mm.293181	2700088M22Rik	RIKEN cDNA 2700088M22 gene	0.00328149	0.0813997
H3113A10	Mm.30806	Rpl19	ribosomal protein L19	0.00328542	0.0813747
H3012C01	Mm.24848	Deb1	differentially expressed in B16F10 1	0.00331203	0.0819106
H3147F07	Mm.29820	Bnip3l	BCL2/adenovirus E1B 19kDa-interacting protein 3-like	0.00333203	0.0822816
H3026B03	Mm.182927	Mrpl15	mitochondrial ribosomal protein L15	0.00334801	0.0825524
H3013D11	Mm.147226	Mt2	metallothionein 2	0.00336129	0.0827562
H3114A06	Mm.2734	Sat1	spermidine/spermine N1-acetyl transferase 1	0.00336454	0.0827124
H3141C01	Mm.103111		Mus musculus transcribed sequences	0.00336541	0.0826106
H3102F02	Mm.132226	2210022F10Rik	RIKEN cDNA 2210022F10 gene	0.00336569	0.0824945
H3125D11	Mm.28140	Tbc1d10	TBC1 domain family, member 10	0.00336957	0.0824668
H3112B10	Mm.41744	AW545966	expressed sequence AW545966	0.00337507	0.082479
H3064H06	Mm.126694	Whsc1	Wolf-Hirschhorn syndrome candidate 1 (human)	0.00339678	0.0828866
H3020B11	Mm.281517	5730598B06	hypothetical protein 5730598B06	0.00339802	0.0827941
H3002A01	Mm.27026	Clgn	calmegin	0.00341576	0.0831034
H3017G10	Mm.283045	1500003D12Rik	RIKEN cDNA 1500003D12 gene	0.00341672	0.0830042
H3150B11	Mm.260433	Ptpn2	protein tyrosine phosphatase, non-receptor type 2	0.00342861	0.0831703
H3154E04	Mm.275082	2310021P13Rik	RIKEN cDNA 2310021P13 gene	0.00343064	0.0830972
H3052A11	Mm.312168	C430039G02Rik	RIKEN cDNA C430039G02 gene	0.00343461	0.0830711
T022	Mm.212703	Mor2	malate dehydrogenase, soluble	0.0034595	0.0835504
H3081G07	Mm.152850		Mus musculus 13 days embryo heart cDNA, RIKEN full-length enriched library, clone:D330022F04 product:unknown EST, full insert sequence	0.0034628	0.0835078
H3104B08	Mm.218317	4930553M18Rik	RIKEN cDNA 4930553M18 gene	0.00348893	0.0840148
H3015E12	Mm.102715		Mus musculus transcribed sequences	0.00349619	0.0840667
H3002C05			EST	0.00351034	0.0842839
H3090B09			EST	0.00351662	0.084312
H3024F11	Mm.1538	Btf3	basic transcription factor 3	0.00351997	0.0842695
H3119D06	Mm.274599	BC025458	cDNA sequence BC025458	0.00352669	0.0843079
H3100F12	Mm.257445	1500026N15Rik	RIKEN cDNA 1500026N15 gene	0.00357826	0.0854167
H3011H08	Mm.8856	Neu1	neuraminidase 1	0.00359623	0.0857214
H3024H01	Mm.271062	Ict1	immature colon carcinoma transcript 1	0.00360263	0.0857498
H3002A05	Mm.155	2610204K14Rik	RIKEN cDNA 2610204K14 gene	0.00360537	0.0856912
H3126H02			EST	0.00361212	0.0857281
H3096F12	Mm.173877		Mus musculus transcribed sequences	0.00361295	0.0856243
H3013G09	Mm.326952		Mus musculus transcribed sequence with strong similarity to protein pir:S50853 (H.sapiens) S50853 translation releasing factor eRF-1 [validated] - human	0.00362013	0.0856712
H3111H02	Mm.245297	Cyp4v3	cytochrome P450, family 4, subfamily v, polypeptide 3	0.00362878	0.0857526
H3013B08	Mm.260578	Pdxk	pyridoxal (pyridoxine, vitamin B6) kinase	0.00363135	0.0856904
H3022E10	Mm.3243	Procr	protein C receptor, endothelial	0.00365114	0.0860342
H3151F01			EST	0.00365563	0.0860169
H3130H02	Mm.159453	Zfp363	zinc finger protein 363	0.00366104	0.0860215
H3127D05	Mm.249809	Mrps17	mitochondrial ribosomal protein S17	0.00366619	0.0860196
H3115H10	Mm.12677	Atp5c1	ATP synthase, H+ transporting, mitochondrial F1 complex, gamma polypeptide 1	0.00367042	0.0859964
H3066F03	Mm.72773	Drctnnb1a	down-regulated by Ctnnb1, a	0.0036734	0.085944
H3079H09			EST	0.00369596	0.086349
H3019G12	Mm.301305	2510048O06Rik	RIKEN cDNA 2510048O06 gene	0.00370145	0.0863549
H3138H04	Mm.210323	Facl2	fatty acid Coenzyme A ligase, long chain 2	0.00372196	0.0867105
H3045A07	Mm.258310	D930024E11	hypothetical protein D930024E11	0.00375599	0.0873797
H3069D09			EST	0.00376254	0.0874087
H3085B07	Mm.233534	Gnpnat1	glucosamine-phosphate N-acetyltransferase 1	0.00376884	0.0874318
H3019D08	Mm.264435	Ero1l	ERO1-like (S. cerevisiae)	0.00377505	0.0874526
H3095G12	Mm.329143		Mus musculus transcribed sequences	0.00377704	0.0873759
H3100G11			EST	0.00378722	0.0874886
H3127E04	Mm.279861	1810060D16Rik	RIKEN cDNA 1810060D16 gene	0.00379445	0.0875328
H3004E12	Mm.275574	Dtx2	deltex 2 homolog (Drosophila)	0.00380856	0.0877355
H3118G09			EST	0.00381	0.087646
H3082E11	Mm.28357	Map1lc3	microtubule-associated protein 1 light chain 3	0.0038163	0.0876685
H3064A08	Mm.12553	Rfc3	replication factor C (activator 1) 3	0.00382117	0.087658
H3003D07	Mm.282093	Ubb	ubiquitin B	0.00383159	0.0877749
H3021F12	Mm.7141	Pcna	proliferating cell nuclear antigen	0.00383894	0.0878212
H3066D05	Mm.206775	Oas1c	2'-5' oligoadenylate synthetase 1C	0.00384538	0.0878465
H3129G01	Mm.182692	Sh3glb1	SH3-domain GRB2-like B1 (endophilin)	0.00384733	0.0877693
H3151A02	Mm.12746	1110004D19Rik	RIKEN cDNA 1110004D19 gene	0.00385204	0.0877552
P551	Mm.1236	Gadd45a	growth arrest and DNA-damage-inducible 45 alpha	0.0038734	0.08812
H3036E06	Mm.245948	D2Ertd97e	DNA segment, Chr 2, ERATO Doi 97, expressed	0.00387616	0.0880611
H3107D07	Mm.19172	BC025586	cDNA sequence BC025586	0.0038811	0.0880517
H3010C07	Mm.39039	Irx3	Iroquois related homeobox 3 (Drosophila)	0.00388716	0.088068
P699	Mm.31752	Cd47	CD47 antigen (Rh-related antigen, integrin-associated signal transducer)	0.00390314	0.0883087
H3133E08	Mm.89324		Mus musculus 16 days neonate cerebellum cDNA, RIKEN full-length enriched library, clone:9630010G10 product:unknown EST, full insert sequence	0.00392934	0.0887793
H3099D09	Mm.19073	Map4k4	mitogen-activated protein kinase kinase kinase kinase 4	0.00393821	0.0888579
P635	Mm.3896	Dlx2	distal-less homeobox 2	0.00395392	0.0890904
H3120G11	Mm.232472	Kcnab3	potassium voltage-gated channel, shaker-related subfamily, beta member 3	0.00395907	0.0890845
H3106H05			EST	0.00396349	0.0890622
H3054E07	Mm.37985	2610019A05Rik	RIKEN cDNA 2610019A05 gene	0.00398271	0.0893721
H3009F05	Mm.293960		Mus musculus similar to phosphatidylserine decarboxylase (LOC236604), mRNA	0.00399389	0.0895013
P701	Mm.4325	Klf4	Kruppel-like factor 4 (gut)	0.00400421	0.0896106
H3142B12	Mm.16925	Thy28	thymocyte protein thy28	0.00401463	0.0897219
H3063D02	Mm.302134		Mus musculus 16 days neonate thymus cDNA, RIKEN full-length enriched library, clone:A130084C19 product:prothymosin alpha homolog [Mus musculus], full insert sequence	0.00402005	0.0897212
H3112B05	Mm.332171		Mus musculus transcribed sequence with strong similarity to protein ref:NP_055131.1 (H.sapiens) calcium-regulated heat-stable protein (24kD) [Homo sapiens]	0.00406291	0.0905551
H3100H08	Mm.219444	5730403H17Rik	RIKEN cDNA 5730403H17 gene	0.00406531	0.0904862
H3014H06	Mm.245739	G430055L02Rik	RIKEN cDNA G430055L02 gene	0.00406594	0.090378
H3108A04	Mm.200608	Clu	clusterin	0.00406954	0.0903361
H3126F07			EST	0.00407214	0.0902722
H3126F01	Mm.33582	Plxna2	plexin A2	0.00410666	0.090915
H3150H10	Mm.27432	Dnajb9	DnaJ (Hsp40) homolog, subfamily B, member 9	0.00411036	0.0908748
H3011A01	Mm.277621	0610041P13Rik	RIKEN cDNA 0610041P13 gene	0.00412189	0.0910075
H3003E08	Mm.322602		Mus musculus transcribed sequence with weak similarity to protein pir:I58401 (M.musculus) I58401 protein-tyrosine kinase (EC 2.7.1.112) JAK3 - mouse	0.00412202	0.0908886
H3023E01	Mm.42944	Skp1a	S-phase kinase-associated protein 1A	0.00412205	0.0907678
H3073F07	Mm.277094	Sfpq	splicing factor proline/glutamine rich (polypyrimidine tract binding protein associated)	0.00413921	0.0910239
H3097E05	Mm.30234	Ik	IK cytokine	0.00415735	0.0913009
H3127H03	Mm.140568	1100001I22Rik	RIKEN cDNA 1100001I22 gene	0.00415964	0.0912296
H3013B12	Mm.252542	D10Ertd718e	DNA segment, Chr 10, ERATO Doi 718, expressed	0.00416051	0.0911273
H3026E08	Mm.43005	Uba52	ubiquitin A-52 residue ribosomal protein fusion product 1	0.00416805	0.0911713
H3059C04	Mm.156195	AI851076	expressed sequence AI851076	0.00417134	0.0911222
H3149C08	Mm.182816		Mus musculus transcribed sequences	0.00418563	0.0913132
H3006B09	Mm.250552		Mus musculus ES cells cDNA, RIKEN full-length enriched library, clone:2410017P09 product:weakly similar to CG14903 PROTEIN [Drosophila melanogaster], full insert sequence	0.00419368	0.0913678
H3152D03	Mm.250641	C330002I19Rik	RIKEN cDNA C330002I19 gene	0.00420157	0.0914188
H3145E11	Mm.228954	Mbnl1	muscleblind-like 1 (Drosophila)	0.00420212	0.0913102
H3144G09	Mm.28063	5730466P16Rik	RIKEN cDNA 5730466P16 gene	0.00420353	0.0912206
H3018D12	Mm.30210	Psma6	proteasome (prosome, macropain) subunit, alpha type 6	0.00420374	0.0911051
H3125G02	Mm.303685		Mus musculus 12 days embryo spinal ganglion cDNA, RIKEN full-length enriched library, clone:D130035P20 product:unclassifiable, full insert sequence	0.00420733	0.0910631
H3046C04	Mm.322777		Mus musculus transcribed sequence with moderate similarity to protein pir:S12207 (M.musculus) S12207 hypothetical protein (B2 element) - mouse	0.00420873	0.0909737
H3043F01	Mm.122774	FHOS2	formin-family protein FHOS2	0.00423579	0.0914386
P028	Mm.245363	Pdcd1lg1	programmed cell death 1 ligand 1	0.00424705	0.0915617
H3015C08	Mm.155058	D13Wsu14e	DNA segment, Chr 13, Wayne State University 14, expressed	0.00425242	0.0915577
H3071B01	Mm.286598	Thap11	THAP domain containing 11	0.00425356	0.0914626
H3092G08	Mm.261045	Ppm1a	protein phosphatase 1A, magnesium dependent, alpha isoform	0.00426898	0.0916746
H3112B01	Mm.290178	Sap18	Sin3-associated polypeptide 18	0.00428179	0.0918298
H3124H01	Mm.8688	Ndufb10	NADH dehydrogenase (ubiquinone) 1 beta subcomplex, 10	0.0042867	0.0918156
H3082D07	Mm.4269	Tcf4	transcription factor 4	0.00430468	0.092081
H3106D01	Mm.323251		Mus musculus transcribed sequence with strong similarity to protein ref:NP_073729.1 (H.sapiens) microtubule-associated proteins 1A/1B light chain 3 [Homo sapiens]	0.00431405	0.0921618
H3016A12	Mm.28221	AW544865	expressed sequence AW544865	0.00431569	0.0920774
H3158F05			EST	0.00432594	0.0921766
H3018E09	Mm.253564	Strm	striamin	0.00432818	0.0921052
H3046A03	Mm.21475	BC003479	cDNA sequence BC003479	0.0043331	0.092091
H3123F02	Mm.224354	Tsc1	tuberous sclerosis 1	0.00433604	0.0920348
H3128A12			EST	0.00434301	0.0920639
H3006F02			EST	0.00434862	0.0920643
H3084B03	Mm.105585	Peo1	progressive external ophthalmoplegia 1 (human)	0.00436034	0.0921941
H3070G01	Mm.180003	Rps27a	ribosomal protein S27a	0.00436084	0.0920863
H3098E12	Mm.86541	Ccrn4l	CCR4 carbon catabolite repression 4-like (S. cerevisiae)	0.00437289	0.0922227
H3080H09	Mm.279437	Cfdp	craniofacial development protein 1	0.00437565	0.0921628
H3081A09	Mm.165483		Mus musculus transcribed sequences	0.00439378	0.0924265
H3101E10	Mm.207263	Lypla1	lysophospholipase 1	0.00440096	0.0924594
H3052B12			EST	0.0044016	0.0923552
H3089A02	Mm.24783	BC031840	cDNA sequence BC031840	0.00440373	0.0922821
H3085G10	Mm.125196	Axud1	AXIN1 up-regulated 1	0.00440641	0.0922211
H3094F09	Mm.44069	Rnf12	ring finger protein 12	0.00441139	0.0922082
H3050A04	Mm.37210	Ap1g1	adaptor protein complex AP-1, gamma 1 subunit	0.00441397	0.0921452
H3017B11	Mm.9052	Pgrmc1	progesterone receptor membrane component 1	0.00441921	0.0921377
H3003B05	Mm.34790	U2af1l4	U2 small nuclear RNA auxiliary factor 1-like 4	0.00442365	0.0921137
H3006B12			EST	0.00443767	0.0922889
H3121A11	Mm.143790	Pvrl1	poliovirus receptor-related 1	0.00444954	0.0924191
H3153C01	Mm.27117		Mus musculus 10 day old male pancreas cDNA, RIKEN full-length enriched library, clone:1810030A06 product:unknown EST, full insert sequence	0.00445575	0.0924315
H3027A05	Mm.276338	Rbm14	RNA binding motif protein 14	0.004463	0.0924655
H3116D11	Mm.3819	Cox7a2	cytochrome c oxidase, subunit VIIa 2	0.00447278	0.0925518
H3155B12	Mm.202346	4932702G04Rik	RIKEN cDNA 4932702G04 gene	0.00447486	0.0924785
H3113B08	Mm.136093	Atp5k	ATP synthase, H+ transporting, mitochondrial F1F0 complex, subunit e	0.00448413	0.092554
H3012C12	Mm.239765	2310042M24Rik	RIKEN cDNA 2310042M24 gene	0.00450447	0.0928575
H3046C02			EST	0.00450981	0.0928513
H3115A08	Mm.263124	Ly6a	lymphocyte antigen 6 complex, locus A	0.00451413	0.0928243
H3037A07	Mm.21926		Mus musculus 0 day neonate eyeball cDNA, RIKEN full-length enriched library, clone:E130304A01 product:HUNTINGTIN INTERACTING PROTEIN HYPE (FRAGMENT) homolog [Homo sapiens], full insert sequence	0.00451428	0.0927117
H3042H12	Mm.235523	Spg20	spastic paraplegia 20, spartin (Troyer syndrome) homolog (human)	0.00451735	0.092659
H3106C08	Mm.260943	A030003E17Rik	RIKEN cDNA A030003E17 gene	0.00452642	0.0927297
H3004F08	Mm.180873	2510019J09Rik	RIKEN cDNA 2510019J09 gene	0.00454422	0.0929786
H3132A10			EST	0.00455077	0.0929971
H3123F11	Mm.279485	Rnh1	ribonuclease/angiogenin inhibitor 1	0.00456288	0.0931292
H3123F08	Mm.613	Anp32a	acidic (leucine-rich) nuclear phosphoprotein 32 family, member A	0.00456709	0.0930996
H3022H05	Mm.275628	D130059P03Rik	RIKEN cDNA D130059P03 gene	0.00457182	0.0930808
H3027H07	Mm.296730	Rpl15	ribosomal protein L15	0.00458509	0.0932359
H3103H05	Mm.182650	2610209M04Rik	RIKEN cDNA 2610209M04 gene	0.00458551	0.0931294
H3113A12	Mm.270065	Gas5	growth arrest specific 5	0.00460718	0.0934542
H3080C04	Mm.155	2610204K14Rik	RIKEN cDNA 2610204K14 gene	0.0046137	0.0934714
H3120C07	Mm.40298	A530090O15Rik	RIKEN cDNA A530090O15 gene	0.00461478	0.0933783
H3151E02			EST	0.00461792	0.0933273
H3054E03			EST	0.00463677	0.0935934
H3001E11	Mm.24521	AA407930	expressed sequence AA407930	0.0046375	0.0934935
H3067D12	Mm.173619		Mus musculus transcribed sequences	0.00464573	0.0935451
H3156D05	Mm.29460	Ak2	adenylate kinase 2	0.00465145	0.0935459
H3144G04			EST	0.00466893	0.0937829
H3095F08	Mm.120274	Arhv	ras homolog gene family, member V	0.00467376	0.0937655
H3112F01	Mm.236127	3110052N05Rik	RIKEN cDNA 3110052N05 gene	0.00468359	0.0938485
H3139C10			EST	0.00469477	0.0939582
H3079E09	Mm.262056	AW050020	expressed sequence AW050020	0.00470624	0.0940735
H3013H10	Mm.36511	Mrpl32	mitochondrial ribosomal protein L32	0.0047394	0.0946215
H3025D04	Mm.250874	Eif3s2	eukaryotic translation initiation factor 3, subunit 2 (beta)	0.00475007	0.0947195
H3078C12	Mm.208465	2900091E11Rik	RIKEN cDNA 2900091E11 gene	0.00475609	0.0947249
H3096F10	Mm.29812	set-15	selenoprotein	0.00475973	0.0946831
H3051D07	Mm.22363	Rarsl	arginyl-tRNA synthetase-like	0.00476061	0.0945862
H3091C12	Mm.197552	Tgfbr1	transforming growth factor, beta receptor I	0.00476384	0.0945365
H3126G03	Mm.31643	Prkrip1	Prkr interacting protein 1 (IL11 inducible)	0.00477762	0.0946958
H3120D09	Mm.66	Rps4x	ribosomal protein S4, X-linked	0.00479566	0.094939
H3105C03	Mm.5915	2410012M04Rik	RIKEN cDNA 2410012M04 gene	0.00480016	0.094914
H3008G12	Mm.41877	5730438N18Rik	RIKEN cDNA 5730438N18 gene	0.00480275	0.0948514
H3069C06			EST	0.00480415	0.0947654
H3058F01	Mm.44068	3830406C13Rik	RIKEN cDNA 3830406C13 gene	0.00483579	0.0952755
H3110E06	Mm.210949	9130011E15Rik	RIKEN cDNA 9130011E15 gene	0.00484304	0.0953043
H3010C04	Mm.298233	Pabpc1	poly A binding protein, cytoplasmic 1	0.00486269	0.0955768
H3128C07	Mm.18571	Zfp36l1	zinc finger protein 36, C3H type-like 1	0.00486609	0.0955296
H3064B11	Mm.172138		Mus musculus transcribed sequences	0.00488172	0.0957224
H3114B08	Mm.24601	1810034K20Rik	RIKEN cDNA 1810034K20 gene	0.00488908	0.0957527
H3071C06	Mm.12468	Gbas	glioblastoma amplified sequence	0.00491338	0.0961143
H3003B04	Mm.325667		Mus musculus transcribed sequence with weak similarity to protein sp:Q9R233 (M.musculus) TPSN_MOUSE Tapasin precursor (TPSN) (TPN) (TAP-binding protein) (TAP-associated protein)	0.00493947	0.0965101
H3045E02	Mm.172804		Mus musculus adult male corpora quadrigemina cDNA, RIKEN full-length enriched library, clone:B230210N13 product:unclassifiable, full insert sequence	0.00494418	0.0964876
H3078H06	Mm.291755	1190005P17Rik	RIKEN cDNA 1190005P17 gene	0.00497167	0.0969094
P850	Mm.270065	Gas5	growth arrest specific 5	0.00499555	0.0972596
H3021C04	Mm.13886	Sui1-rs1	suppressor of initiator codon mutations, related sequence 1 (S. cerevisiae)	0.00500219	0.0972741
H3052B11	Mm.28130	Pctk3	PCTAIRE-motif protein kinase 3	0.00500428	0.0971999
H3144C01	Mm.261984	Glo1	glyoxalase 1	0.00500547	0.0971084
H3025D03	Mm.10374	2610002J02Rik	RIKEN cDNA 2610002J02 gene	0.00500733	0.0970303
H3124G01			EST	0.00502349	0.0972291
H3072H10	Mm.203747	Arrb2	arrestin, beta 2	0.00503614	0.0973595
H3159B07	Mm.207113	2900057K09Rik	RIKEN cDNA 2900057K09 gene	0.00503761	0.0972738
H3122G08	Mm.12715	2310016C16Rik	RIKEN cDNA 2310016C16 gene	0.00503907	0.0971879
P747	Mm.297056	Psma3	proteasome (prosome, macropain) subunit, alpha type 3	0.00507215	0.0977115
H3005D04	Mm.276337	Rpl17	ribosomal protein L17	0.00508138	0.0977751
H3076D11	Mm.11747	E2f7	E2F transcription factor 7	0.00508414	0.0977139
H3096B05	Mm.257837	Atp11a	ATPase, class VI, type 11A	0.00509278	0.097766
H3154H12	Mm.126534	Paip2	polyadenylate-binding protein-interacting protein 2	0.00509672	0.0977276
H3094A04	Mm.12616	Dnajc3	DnaJ (Hsp40) homolog, subfamily C, member 3	0.00510084	0.097693
H3029F12	Mm.276337	Rpl17	ribosomal protein L17	0.00511093	0.0977725
H3104C08	Mm.261786	Arcn1	archain 1	0.00512002	0.0978328
H3125B10	Mm.21444	1110003H09Rik	RIKEN cDNA 1110003H09 gene	0.00513471	0.0979998
H3096F07	Mm.17548		Mus musculus transcribed sequences	0.00516493	0.0984624
H3017G06	Mm.28922	Farsl	phenylalanine-tRNA synthetase-like	0.00516745	0.0983966
H3014B02	Mm.298115		Mus musculus transcribed sequence with moderate similarity to protein ref:NP_057223.1 (H.sapiens) 16.7Kd protein [Homo sapiens]	0.00520436	0.098985
H3064G10	Mm.3774	2610005H11Rik	RIKEN cDNA 2610005H11 gene	0.00520745	0.0989296
H3118C05	Mm.4419	Rpl5	ribosomal protein L5	0.00521149	0.0988922
H3075E11	Mm.285906	Supt5h	suppressor of Ty 5 homolog (S. cerevisiae)	0.00521725	0.0988876
H3026F02	Mm.1090	Gpx1	glutathione peroxidase 1	0.00522426	0.0989067
H3031G11	Mm.22602	Atp6v0e	ATPase, H+ transporting, V0 subunit	0.00523473	0.098991
H3023C11	Mm.196371	2610511G16Rik	RIKEN cDNA 2610511G16 gene	0.00524123	0.0990003
H3020G09	Mm.104617	9930104H07Rik	RIKEN cDNA 9930104H07 gene	0.00524605	0.0989779
H3149E01	Mm.32002	1190004I24Rik	RIKEN cDNA 1190004I24 gene	0.00525414	0.099017
H3083C03	Mm.330218		Mus musculus transcribed sequences	0.00525442	0.0989092
H3046H10	Mm.271160	Upf3b	UPF3 regulator of nonsense transcripts homolog B (yeast)	0.00526934	0.0990768
H3126F08	Mm.226554	Tfb1m	transcription factor B1, mitochondrial	0.00527822	0.0991307
H3073G06	Mm.329854		Mus musculus transcribed sequences	0.00528153	0.0990798
T024	Mm.246965	Sdhb	succinate dehydrogenase complex, subunit B, iron sulfur (Ip)	0.00528822	0.0990924
H3029G07	Mm.170029	Hszfp36	ZFP-36 zinc finger protein	0.00529198	0.0990503
H3124G04	Mm.272468	1300019H17Rik	RIKEN cDNA 1300019H17 gene	0.00529598	0.0990126
H3140D11	Mm.322983		Mus musculus transcribed sequences	0.00529667	0.0989133
H3052D04			EST	0.00530197	0.0989
H3006A06	Mm.275741	Surf2	surfeit gene 2	0.00531169	0.0989693
H3122F04	Mm.229109	Abcd4	ATP-binding cassette, sub-family D (ALD), member 4	0.00534422	0.0994628
H3113G12	Mm.246551	Erh	enhancer of rudimentary homolog (Drosophila)	0.00534705	0.0994031
H3047E07			EST	0.00536001	0.0995319
H3157G02			EST	0.00536134	0.0994443
H3089G05	Mm.24125	Col4a3bp	collagen, type IV, alpha 3 (Goodpasture antigen) binding protein	0.0053697	0.0994875
H3092A03			EST	0.00538251	0.0996127
H3003A09	Mm.171794		Mus musculus transcribed sequences	0.00538885	0.0996182
H3089F03	Mm.222093	BC003331	cDNA sequence BC003331	0.00540837	0.099867
P045	Mm.140380	Rpl23	ribosomal protein L23	0.00541562	0.0998887
H3041C02	Mm.275265	2310030N02Rik	RIKEN cDNA 2310030N02 gene	0.00542405	0.0999324
H3051B12	Mm.16930		Mus musculus 13 days embryo forelimb cDNA, RIKEN full-length enriched library, clone:5930433N17 product:unknown EST, full insert sequence	0.00543283	0.0999823
H3130G01	Mm.195036	Trim33	tripartite motif protein 33	0.00543307	0.0998752
P525	Mm.288630	Calm3	calmodulin 3	0.00544624	0.100006
H3029F11	Mm.276337	Rpl17	ribosomal protein L17	0.00544674	0.0999034
H3045C02	Mm.3074	Ube2l3	ubiquitin-conjugating enzyme E2L 3	0.00545334	0.0999133

## Sheet: st48_up_fdr20
List of induced genes at 48h in hEWS/FLI1V5 expressing STO cells (FDR 20%)
Clone ID	Unigene cluster	Gene symbol	Gene name	t-test p value	FDR
H3155H05	Mm.235137	Scye1	small inducible cytokine subfamily E, member 1	7.09263e-06	0.116823
P715	Mm.4993	Mmp3	matrix metalloproteinase 3	3.76307e-05	0.309908
H3041B06	Mm.252171	Snx2	sorting nexin 2	4.36086e-05	0.239426
H3149D12	Mm.291443	Lysal1	lysosomal apyrase-like 1	4.38101e-05	0.180399
H3120G03	Mm.30051	Rnf10	ring finger protein 10	4.75179e-05	0.156534
H3099E08	Mm.22363	Rarsl	arginyl-tRNA synthetase-like	5.82516e-05	0.15991
H3151D12	Mm.195776	Lias	lipoic acid synthetase	6.19282e-05	0.145717
H3047D12			EST	6.51713e-05	0.13418
H3155C12	Mm.51988	1110054O05Rik	RIKEN cDNA 1110054O05 gene	7.20776e-05	0.13191
H3006G01	Mm.7454	Igbp1	immunoglobulin (CD79A) binding protein 1	0.000102496	0.168821
H3108D07	Mm.290596	Zfp35	zinc finger protein 35	0.000103025	0.154266
H3023E10	Mm.182769	Rbm17	RNA binding motif protein 17	0.000134013	0.183945
H3100G07	Mm.280544	Ddx52	DEAD (Asp-Glu-Ala-Asp) box polypeptide 52	0.0001474	0.186756
P844	Mm.7214	Anxa3	annexin A3	0.000149121	0.17544
H3079B05	Mm.22362	H47	histocompatibility 47	0.000179957	0.197605
H3082D02	Mm.46705	Sdccag1	serologically defined colon cancer antigen 1	0.000183503	0.188905
H3016C10	Mm.296383	Hspca	heat shock protein 1, alpha	0.000202202	0.19591
H3118H06	Mm.34871	Idb2	inhibitor of DNA binding 2	0.000212958	0.194868

## Sheet: st48_down_fdr20
List of repressed genes at 48h in hEWS/FLI1V5 expressing STO cells (FDR 20%)
Clone ID	Unigene cluster	Gene symbol	Gene name	t-test p value	FDR
T011	Mm.29768	Pdk2	pyruvate dehydrogenase kinase, isoenzyme 2	8.68984e-06	0.14313
H3019A08	Mm.30010	Arpc1b	actin related protein 2/3 complex, subunit 1B	1.11459e-05	0.0917924
H3019E06	Mm.3973	Stx8	syntaxin 8	1.3536e-05	0.0743174
H3079G07	Mm.12758	Fkbp4	FK506 binding protein 4	1.60145e-05	0.0659439
H3074F12	Mm.790	Tparl	TPA regulated locus	2.4115e-05	0.0794395
H3084B08	Mm.204607		Mus musculus transcribed sequence with strong similarity to protein pir:S12207 (M.musculus) S12207 hypothetical protein (B2 element) - mouse	4.23595e-05	0.116284
H3083A09			EST	5.49149e-05	0.129215
H3027A10	Mm.30155	Atp6v0c	ATPase, H+ transporting, V0 subunit C	6.29222e-05	0.129549
H3047E10	Mm.45744	C80587	expressed sequence C80587	6.42619e-05	0.117606
H3148G08	Mm.213226	Igf2r	insulin-like growth factor 2 receptor	8.32918e-05	0.13719
P770	Mm.86483	Spry1	sprouty homolog 1 (Drosophila)	9.34889e-05	0.139987
H3107F11	Mm.229761		Mus musculus 11 days pregnant adult female ovary and uterus cDNA, RIKEN full-length enriched library, clone:5031436O03 product:unknown EST, full insert sequence	0.000107506	0.14756
H3031C12	Mm.30837	Ndr1	N-myc downstream regulated 1	0.00011678	0.14796
H3042H08	Mm.114382	Spred2	sprouty protein with EVH-1 domain 2, related sequence	0.000117046	0.137704
P720	Mm.2444	Myc	myelocytomatosis oncogene	0.000117459	0.128978
H3032H10	Mm.266215	Xpr1	xenotropic and polytropic retrovirus receptor 1	0.000118414	0.1219
T113	Mm.26743	Apoa1	apolipoprotein A-I	0.000147121	0.142543
H3058E11	Mm.29824	Psa	puromycin-sensitive aminopeptidase	0.000193265	0.176848
H3035B08	Mm.80484	B230215L03Rik	RIKEN cDNA B230215L03 gene	0.000200428	0.17375
H3135E03	Mm.306638		Mus musculus transcribed sequences	0.00020977	0.172756
H3151C12			EST	0.000214098	0.167924
H3011D07	Mm.28688	Sars1	seryl-aminoacyl-tRNA synthetase 1	0.000216375	0.161996
H3010E03	Mm.104975	1300012C15Rik	RIKEN cDNA 1300012C15 gene	0.00022442	0.160714
T475	Mm.277406	Stat1	signal transducer and activator of transcription 1	0.000240359	0.164956
H3137C06	Mm.18843	Tgm2	transglutaminase 2, C polypeptide	0.000242186	0.159562
H3021F04	Mm.13823	Dph2l2	diptheria toxin resistance protein required for diphthamide biosynthesis (Saccharomyces)-like 2	0.000249801	0.158249
H3088C11	Mm.156452	4432404J10Rik	RIKEN cDNA 4432404J10 gene	0.00026206	0.159867
H3055D06			EST	0.000271058	0.15945
H3137E06	Mm.28402	BC043098	cDNA sequence BC043098	0.000272537	0.154792
H3028H06	Mm.34411	D530020C15Rik	RIKEN cDNA D530020C15 gene	0.000298025	0.163626
H3037H08	Mm.1597	Mov10	Moloney leukemia virus 10	0.000306956	0.163092
H3057H01	Mm.257371	BC010245	cDNA sequence BC010245	0.000333527	0.171673
H3110H03	Mm.287163	Banp	Btg3 associated nuclear protein	0.000345132	0.172263
H3027G06	Mm.227598	3632413B07Rik	RIKEN cDNA 3632413B07 gene	0.000375314	0.181818
H3014H04	Mm.284984	Ywhag	3-monooxgenase/tryptophan 5-monooxgenase activation protein, gamma polypeptide	0.000378014	0.177893

## Sheet: ma72_up_fdr20
List of induced genes at 72h in hEWS/FLI1V5 expressing MPC's (FDR 20%)
Clone ID	Unigene cluster	Gene symbol	Clone name	t-test p value	FDR
H3120H03	Mm.288282	Alcam	activated leukocyte cell adhesion molecule	1.43e-05	0.235535
H3055F01	Mm.23168	2310067B10Rik	RIKEN cDNA 2310067B10 gene	1.709e-05	0.140745
H3090E02	Mm.246262		Mus musculus transcr. seq. with weak similarity to protein ref:NP_081764.1 (M.musculus) RIKEN cDNA 5730493B19 [Mus musculus]	1.746e-05	0.0958612
H3099C09	Mm.268521	Igf1	insulin-like growth factor 1	2.307e-05	0.0949965
H3133G07	Mm.315871		Mus musculus transcribed sequences	2.844e-05	0.093687
H3135F04	Mm.1161	Zfp185	zinc finger protein 185	3.389e-05	0.0930337
H3024D01	Mm.227260	4930542G03Rik	RIKEN cDNA 4930542G03 gene	4.564e-05	0.107391
H3019C03	Mm.2661	Tk1	thymidine kinase 1	4.804e-05	0.0989084
T158	Mm.268521	Igf1	insulin-like growth factor 1	5.225e-05	0.0956233
T186	Mm.192224	Zfp36	zinc finger protein 36	6.281e-05	0.103454
H3022G09	Mm.273177	Krt1-19	keratin complex 1, acidic, gene 19	9.47e-05	0.1418
H3144A06	Mm.268521	Igf1	insulin-like growth factor 1	9.691e-05	0.133017
H3146G04	Mm.182796		Mus musculus transcribed sequences	0.00010815	0.137026
H3030D10	Mm.151203	Pkm2	pyruvate kinase, muscle	0.00011271	0.132603
H3021C05	Mm.275554	1100001D10Rik	RIKEN cDNA 1100001D10 gene	0.00011371	0.124861
H3154G07	Mm.29254	Igfbp3	insulin-like growth factor binding protein 3	0.00013739	0.141434
H3030D11	Mm.151203	Pkm2	pyruvate kinase, muscle	0.00014669	0.142125
H3001D07	Mm.116704	B230333C21Rik	RIKEN cDNA B230333C21 gene	0.00017834	0.163191
H3035H02	Mm.172617		Mus musculus transcribed sequences	0.00018129	0.157159
H3126F05	Mm.578	Igfbp5	insulin-like growth factor binding protein 5	0.00020603	0.169676
H3158G09	Mm.60720	Btbd2	BTB (POZ) domain containing 2	0.0002282	0.178985
H3081C05	Mm.214765	1500003O03Rik	RIKEN cDNA 1500003O03 gene	0.00025214	0.188773
H3068A11	Mm.291555		Mus musculus transcr. seq. with moderate similarity to protein sp:P02792 (H.sapiens) FRIL_HUMAN Ferritin light chain (Ferritin L subunit)	0.00027967	0.20028
H3106A12	Mm.101711	E130113K08Rik	RIKEN cDNA E130113K08 gene	0.00028637	0.196533

## Sheet: mpcs72down
List of repressed genes at 72h in hEWS/FLI1V5 expressing MPC's (FDR 20%)
Clone ID	Unigene cluster	Gene symbol	Clone name	t-test p value	FDR
H3147H10	Mm.295565	4930443C24Rik	RIKEN cDNA 4930443C24 gene	8.36572e-06	0.137792
P634	Mm.4543	Dlx1	distal-less homeobox 1	2.77937e-05	0.228895
H3104E02	Mm.31607	AI447711	expressed sequence AI447711	3.18272e-05	0.174742
H3009B09	Mm.28481	4930555P18Rik	RIKEN cDNA 4930555P18 gene	3.32017e-05	0.136716
P604	Mm.71398	Cdkn1c	cyclin-dependent kinase inhibitor 1C (P57)	4.57836e-05	0.15082
P312	Mm.234266	Sdc2	syndecan 2	7.20687e-05	0.197841
H3009D08	EST			7.52319e-05	0.177021
H3062G05	Mm.87329	5930437A14Rik	RIKEN cDNA 5930437A14 gene	7.53211e-05	0.155077
H3120E02	Mm.4266	Itm2b	integral membrane protein 2B	0.000125173	0.22908
H3103D06	Mm.272247		Mus musculus transcribed sequences	0.000129781	0.213762
H3098B07	Mm.152121		Mus musculus adult male corpora quadrigemina cDNA, RIKEN full-length enriched library, clone:B230343A10 product:unknown EST, full insert sequence	0.00013432	0.201126
H3136C06	Mm.193922	Lphn2	latrophilin 2	0.000135547	0.186049
H3103E10	Mm.276368	Arhgap18	Rho GTPase activating protein 18	0.000146859	0.18607

## Sheet: ma48_up_fdr10
List of induced genes at 48h in hEWS/FLI1V5 expressing MPC's (FDR 10%)
Clone ID	Unigene cluster	Gene symbol	Clone name	t-test p value	FDR
H3132A10			EST	3.5302e-08	0.00058273
H3139C03	Mm.210676	Cd9	CD9 antigen	2.09302e-06	0.0172747
H3037B01	Mm.247651	Kif2c	kinesin family member 2C	3.09237e-06	0.0170153
H3013B11	Mm.131150	Dek	DEK oncogene (DNA binding)	3.41099e-06	0.0140763
H3076B01	Mm.2390	Cited1	Cbp/p300-interacting transactivator with Glu/Asp-rich carboxy-terminal domain 1	7.80732e-06	0.0257751
H3044H09	Mm.214959	BB128963	expressed sequence BB128963	8.29748e-06	0.0228277
H3069A07	Mm.22670	Mdm2	transformed mouse 3T3 cell double minute 2	9.26973e-06	0.0218593
H3022D08	Mm.308014		Mus musculus retinoic acid induced 3, mRNA (cDNA clone IMAGE:4989234), partial cds	1.73512e-05	0.035802
P344	Mm.4177	Ucp1	uncoupling protein 1, mitochondrial	1.9617e-05	0.0359797
H3005C01	Mm.273288	Rap2b	RAP2B, member of RAS oncogene family	2.0764e-05	0.0342752
H3120G12	Mm.173926	4933409N07Rik	RIKEN cDNA 4933409N07 gene	2.11179e-05	0.0316902
H3043C12	Mm.31342	C79267	expressed sequence C79267	3.68351e-05	0.0506698
H3012H03	Mm.244229	2410008G02Rik	RIKEN cDNA 2410008G02 gene	4.49591e-05	0.0570876
H3089G02	Mm.210405	Mtmr2	myotubularin related protein 2	5.24181e-05	0.0618047
T034	Mm.29182	Taldo1	transaldolase 1	5.27199e-05	0.0580165
H3109B09	Mm.41758	Jam2	junction adhesion molecule 2	6.57718e-05	0.0678559
H3091H12	Mm.97383	1110007A13Rik	RIKEN cDNA 1110007A13 gene	7.65946e-05	0.0743734
H3053H09			EST	7.72744e-05	0.0708649
H3033D04	Mm.131011		Mus musculus transcribed sequence with strong similarity to protein sp:P00722 (E. coli) BGAL_ECOLI Beta-galactosidase (Lactase)	7.79605e-05	0.0677312
P407	Mm.250422	Serpine1	serine (or cysteine) proteinase inhibitor, clade E, member 1	8.19394e-05	0.0676287
H3005B05	Mm.254974	5730472N09Rik	RIKEN cDNA 5730472N09 gene	8.22556e-05	0.0646568
H3004B04	Mm.27054	AI464131	expressed sequence AI464131	8.33954e-05	0.0625731
H3104C07	Mm.27856	Ptprk	protein tyrosine phosphatase, receptor type, K	9.1448e-05	0.0656318
H3104E06	Mm.196634	Abcc1	ATP-binding cassette, sub-family C (CFTR/MRP), member 1	0.000102861	0.0707472
H3115A11	Mm.28498	Card4	caspase recruitment domain 4	0.000103298	0.0682054
H3107E03	Mm.264743	2610205J15Rik	RIKEN cDNA 2610205J15 gene	0.000104778	0.0665218
H3020A05	Mm.102761	2600005C20Rik	RIKEN cDNA 2600005C20 gene	0.000107067	0.0654576
H3024H03			EST	0.000116154	0.0684771
H3022A04	Mm.53645	2810003K23Rik	RIKEN cDNA 2810003K23 gene	0.000119358	0.0679396
H3153E06	Mm.242379	Bcap29	B-cell receptor-associated protein 29	0.000132551	0.0729339
H3054E03			EST	0.000133145	0.0708974
H3010F01	Mm.77695	Ccnf	cyclin F	0.000139935	0.0721848
H3017F04	Mm.28663	Abcb6	ATP-binding cassette, sub-family B (MDR/TAP), member 6	0.0001555	0.077783
H3139C10			EST	0.000163448	0.0793541
P500	Mm.179747	Itga7	integrin alpha 7	0.000164101	0.0773948
H3128B12	Mm.277713	D3Jfr1	DNA segment, Chr 3, MJeffers 1	0.000164456	0.0754074
T107	Mm.3484	Npc1	Niemann Pick type C1	0.000165604	0.0738816
T336	Mm.251322	Eno3	enolase 3, beta muscle	0.000170906	0.0742405
H3031F09	Mm.294783	2610102K23Rik	RIKEN cDNA 2610102K23 gene	0.000181018	0.0766172
H3069F09	Mm.290924	Zfp91	zinc finger protein 91	0.000185579	0.0765838
H3121A11	Mm.143790	Pvrl1	poliovirus receptor-related 1	0.000203043	0.0817473
H3093A08	Mm.12654	A230106M15Rik	RIKEN cDNA A230106M15 gene	0.00020417	0.0802438
H3053E12	Mm.2706	Atf3	activating transcription factor 3	0.000209584	0.0804558
H3034A06	Mm.29432	1110018O08Rik	RIKEN cDNA 1110018O08 gene	0.000211024	0.0791674
H3128C02	Mm.1886	Refbp1	RNA and export factor binding protein 1	0.000218501	0.0801511
H3045H02	Mm.19039	Got1	glutamate oxaloacetate transaminase 1, soluble	0.000218771	0.0785056
H3065B06			EST	0.00022344	0.0784749
H3123H08	Mm.18517	Rasa3	RAS p21 protein activator 3	0.000224052	0.0770506
H3002G11	Mm.89888	Gclc	glutamate-cysteine ligase, catalytic subunit	0.000225745	0.0760484
H3009C07	Mm.296383	Hspca	heat shock protein 1, alpha	0.000226658	0.074829
H3015F08	Mm.260635	Axot	axotrophin	0.00023212	0.0751294
H3048H11			EST	0.000242951	0.0771231
H3042F06	Mm.303929		Mus musculus transcribed sequences	0.000256222	0.0798009
H3116F10	Mm.229404		Mus musculus transcribed sequence with weak similarity to protein pir:I58401 (M.musculus) I58401 protein-tyrosine kinase (EC 2.7.1.112) JAK3 - mouse	0.000268819	0.0821741
H3151E02			EST	0.000272717	0.0818497
H3142F02			EST	0.000299914	0.0884049
H3028D08			EST	0.000306865	0.0888671
H3032G06	Mm.182255	Cd97	CD97 antigen	0.000320682	0.0912672
H3009E11	Mm.3468	Socs3	suppressor of cytokine signaling 3	0.000322161	0.090134
T080	Mm.3711	Gpd2	glycerol phosphate dehydrogenase 2, mitochondrial	0.000353657	0.097297
H3037F03	Mm.26135	Cab39	calcium binding protein 39	0.000357334	0.0966969
T378	Mm.8681	Ptpn11	protein tyrosine phosphatase, non-receptor type 11	0.000360561	0.0959963
H3006C04	Mm.22353	1810029F08Rik	RIKEN cDNA 1810029F08 gene	0.000366311	0.0959792
H3056C10	Mm.17166	4432409D24Rik	RIKEN cDNA 4432409D24 gene	0.000374878	0.0966891
P116	Mm.222260	Cd44	CD44 antigen	0.000376121	0.0955174

## Sheet: ma48_down_fdr10
List of induced genes at 72h in hEWS/FLI1V5 expressing MPC's (FDR 10%)
Clone ID	Unigene cluster	Gene symbol	Clone name	t-test p value	FDR
H3128A10	Mm.29909		Mus musculus 13 days embryo forelimb cDNA, RIKEN full-length enriched library, clone:5930433F13 product:unknown EST, full insert sequence	1.72292e-06	0.0284402
H3028F03	Mm.930	Ctsl	cathepsin L	1.7382e-06	0.0143463
H3050E02	Mm.261600	1810073J13Rik	RIKEN cDNA 1810073J13 gene	2.11939e-06	0.0116616
H3028F04	Mm.930	Ctsl	cathepsin L	2.17367e-06	0.00897019
H3153B11	Mm.301299		Mus musculus mRNA similar to NADH dehydrogenase (ubiquinone) 1, subcomplex unknown, 1 (cDNA clone IMAGE:5683265)	3.64931e-06	0.0120478
H3029D11	Mm.284906	Rars	arginyl-tRNA synthetase	9.5456e-06	0.0262616
P853	Mm.26544	Hoxd9	homeo box D9	1.25688e-05	0.029639
H3119H05	Mm.233891	Mafb	v-maf musculoaponeurotic fibrosarcoma oncogene family, protein B (avian)	1.67856e-05	0.0346351
H3005F02	Mm.274690	Hnrpc	heterogeneous nuclear ribonucleoprotein C	2.10721e-05	0.0386486
H3053E03	Mm.203045	Rragc	Ras-related GTP binding C	2.28532e-05	0.0377237
H3008G03	Mm.2246	Psmb7	proteasome (prosome, macropain) subunit, beta type 7	2.28654e-05	0.0343127
H3039H03			EST	2.41554e-05	0.0332277
H3120F12	Mm.249479	Dncic2	dynein, cytoplasmic, intermediate chain 2	2.72736e-05	0.0346311
H3157B10	Mm.27897	Dnaja1	DnaJ (Hsp40) homolog, subfamily A, member 1	4.1263e-05	0.048652
H3050D10	Mm.24083	Tardbp	TAR DNA binding protein	4.42583e-05	0.0487048
H3127A08	Mm.61901	Mtbp	Mdm2, transformed 3T3 cell double minute p53 binding protein	6.74354e-05	0.0695722
H3113D11	Mm.214932	Rnf144	ring finger protein 144	7.17943e-05	0.0697123
H3156F09	Mm.28818		Mus musculus hypothetical LOC225897 (LOC225897), mRNA	7.73586e-05	0.0709421
H3070G01	Mm.180003	Rps27a	ribosomal protein S27a	7.81947e-05	0.0679347
H3109C09	Mm.259614	1810046J19Rik	RIKEN cDNA 1810046J19 gene	8.68967e-05	0.0717202
H3124B06	Mm.103583	Mc7	brain cDNA 7	9.84589e-05	0.0773934
H3141F12	Mm.3126	Fhl1	four and a half LIM domains 1	0.00010005	0.0750696
H3155G08	Mm.286408		Mus musculus transcribed sequence with strong similarity to protein ref:NP_066357.1 (H.sapiens) ribosomal protein L36a; 60S ribosomal protein L44; L44-like ribosomal protein; ribosomal protein L44; ribosomal protein L36a homologue; 60S ribosomal protein L36a [Homo sapiens]	0.000127865	0.0917684
H3066G03			EST	0.000135596	0.0932621
H3134C05	Mm.243085	Mglap	matrix gamma-carboxyglutamate (gla) protein	0.000136065	0.0898408
H3064F05	Mm.22478	Smarcf1	SWI/SNF related, matrix associated, actin dependent regulator of chromatin, subfamily f, member 1	0.000139339	0.0884639
H3034B07	Mm.1421	Adamts1	a disintegrin-like and metalloprotease (reprolysin type) with thrombospondin type 1 motif, 1	0.000149666	0.0915013
H3026C08	Mm.14485	Tex9	testis expressed gene 9	0.000150119	0.0885008
H3091E10	Mm.18742	Nupr1	nuclear protein 1	0.000153775	0.0875299
H3080F07			EST	0.000161241	0.0887204
H3156G08			EST	0.000162255	0.0863981
H3121E07	Mm.87246	Pcdh18	protocadherin 18	0.000166128	0.085696
H3086B10	Mm.28122	0610030G03Rik	RIKEN cDNA 0610030G03 gene	0.000166275	0.0831726
H3143G02	Mm.196635	2010005E08Rik	RIKEN cDNA 2010005E08 gene	0.000171446	0.0832368
H3114H12	Mm.249555	Col3a1	procollagen, type III, alpha 1	0.000173398	0.0817796
H3095D02	Mm.292293		Mus musculus transcribed sequence with strong similarity to protein ref:NP_076122.1 (M.musculus) RIKEN cDNA 2410016O06 [Mus musculus]	0.000175278	0.0803699
H3125H06	Mm.280083	2010004J23Rik	RIKEN cDNA 2010004J23 gene	0.000176647	0.0788086
H3072F02	Mm.135646		Mus musculus transcribed sequences	0.00017833	0.0774657
H3032C11			EST	0.000190229	0.0805157
H3077H08	Mm.274376	Rdh10	retinol dehydrogenase 10 (all-trans)	0.0002115	0.0872806
H3113G08	Mm.222721	Oaz3	ornithine decarboxylase antizyme 3	0.000226689	0.0912674
H3135E03	Mm.306638		Mus musculus transcribed sequences	0.000238462	0.0937214
H3141H09	Mm.291607	2700099C19Rik	RIKEN cDNA 2700099C19 gene	0.000243755	0.0935736
H3112H12	Mm.254144	Adrbk1	adrenergic receptor kinase, beta 1	0.000249079	0.0934441
H3153H10	Mm.202966	8030499H02Rik	RIKEN cDNA 8030499H02 gene	0.000252764	0.0927194
H3147E08	Mm.28258	1500016L11Rik	RIKEN cDNA 1500016L11 gene	0.000259119	0.0929844
H3082C10			EST	0.000264121	0.0927628
H3075F03	Mm.301250		Mus musculus transcribed sequence with weak similarity to protein sp:P09871 (H.sapiens) C1S_HUMAN Complement C1s component precursor (C1 esterase)	0.000278176	0.0956634
H3028G03	Mm.252529	Robo1	roundabout homolog 1 (Drosophila)	0.000279707	0.0942272
H3097F10	Mm.29812	set-15	selenoprotein	0.000280858	0.0927223
H3096G08	Mm.260521	Pik3ca	phosphatidylinositol 3-kinase, catalytic, alpha polypeptide	0.000284822	0.0921874
H3125B06	Mm.248212	2610300B10Rik	RIKEN cDNA 2610300B10 gene	0.00028634	0.0908963
H3040C10			EST	0.000297015	0.0925062
H3129D09	Mm.57286	1700034P14Rik	RIKEN cDNA 1700034P14 gene	0.000298697	0.0913074
H3118G04	Mm.42767	Rps17	ribosomal protein S17	0.000312387	0.0937559
H3133B12	Mm.317829		Mus musculus transcribed sequences	0.00031753	0.0935977
H3100C02	Mm.179871	Klhl8	kelch-like 8 (Drosophila)	0.000323557	0.0937011
H3116D12	Mm.276092	Vps16	vacuolar protein sorting 16 (yeast)	0.000325695	0.092694
H3136H02	Mm.167541		Mus musculus 16 days embryo head cDNA, RIKEN full-length enriched library, clone:C130078A05 product:unknown EST, full insert sequence	0.000335339	0.093821
H3116B10	Mm.257009		Mus musculus 10 days embryo whole body cDNA, RIKEN full-length enriched library, clone:2610024M03 product:unknown EST, full insert sequence	0.0003412	0.0938699
H3103D05	Mm.28301	Cth	cystathionase (cystathionine gamma-lyase)	0.000355127	0.0960998
H3065H10			EST	0.00036294	0.0966298
P585	Mm.163	B2m	beta-2 microglobulin	0.000381089	0.0998514
H3010E02	Mm.25794	Fbxl5	F-box and leucine-rich repeat protein 5	0.000385009	0.0993021

## Sheet: ma24_up_fdr01
List of induced genes at 24h in hEWS/FLI1V5 expressing MPC's (FDR 1%)
Clone ID	Unigene cluster	Gene symbol	Clone name	t-test p value	FDR
H3141F04	Mm.272389	2900010M23Rik	RIKEN cDNA 2900010M23 gene	1.47405e-07	0.00242791
H3037G09	Mm.21353	E030019A03Rik	RIKEN cDNA E030019A03 gene	1.73319e-07	0.00142737
H3134B03	Mm.43778	Rps14	ribosomal protein S14	2.32655e-07	0.00127735
H3129B12	Mm.289431	Eef2	eukaryotic translation elongation factor 2	2.51699e-07	0.00103643
P564	Mm.6700	Eif4ebp1	eukaryotic translation initiation factor 4E binding protein 1	2.73322e-07	0.000900377
H3138F04	Mm.35650	2700085A14Rik	RIKEN cDNA 2700085A14 gene	2.82684e-07	0.000776015
H3018F01	Mm.7906	Pin1	protein (peptidyl-prolyl cis/trans isomerase) NIMA-interacting 1	3.20113e-07	0.000753226
H3021D02	Mm.273102	Mrpl28	mitochondrial ribosomal protein L28	3.39908e-07	0.000699828
P470	Mm.292208	Hdgf	hepatoma-derived growth factor	3.94437e-07	0.000721864
T035	Mm.154387	Tkt	transketolase	5.06488e-07	0.000834236
H3008A02	Mm.296082	Slc25a11	solute carrier family 25 (mitochondrial carrier; oxoglutarate carrier), member 11	5.57296e-07	0.000834475
H3052H04			EST	6.40131e-07	0.000878633
H3022F05	Mm.314167		Mus musculus transcribed sequence with strong similarity to protein sp:Q61753 (M.musculus) SERA_MOUSE D-3-phosphoglycerate dehydrogenase (3-PGDH) (A10)	6.79844e-07	0.000861362
H3053C02	Mm.25125	5730409F23Rik	RIKEN cDNA 5730409F23 gene	8.78312e-07	0.00103333
P544	Mm.795	Csf1	colony stimulating factor 1 (macrophage)	8.84075e-07	0.000970773
H3152D07	Mm.227110	C1qtnf5	C1q and tumor necrosis factor related protein 5	1.0806e-06	0.00111241
P596	Mm.3460	Cd14	CD14 antigen	1.20441e-06	0.00116693
H3023F03	Mm.218533	1500016H10Rik	RIKEN cDNA 1500016H10 gene	1.30435e-06	0.00119355
H3108A05	Mm.31586	BC021790	cDNA sequence BC021790	1.41741e-06	0.00122875
H3129C02	Mm.289431	Eef2	eukaryotic translation elongation factor 2	1.53053e-06	0.00126047
H3150D01	Mm.39965	Cdk5rap2	CDK5 regulatory subunit associated protein 2	1.53867e-06	0.00120683
H3056F09			EST	1.84459e-06	0.00138101
H3141H08	Mm.214574	1300001I01Rik	RIKEN cDNA 1300001I01 gene	1.86742e-06	0.00133731
H3141F09	Mm.30066	Rpl8	ribosomal protein L8	2.10445e-06	0.00144427
H3155F03	Mm.103634	Rps19	ribosomal protein S19	2.17775e-06	0.00143479
H3025H01	Mm.2948	H2-Ke2	H2-K region expressed gene 2	2.34131e-06	0.00148322
H3020A05	Mm.102761	2600005C20Rik	RIKEN cDNA 2600005C20 gene	2.43456e-06	0.00148517
H3011D07	Mm.28688	Sars1	seryl-aminoacyl-tRNA synthetase 1	2.43508e-06	0.00143243
H3130H10	Mm.43778	Rps14	ribosomal protein S14	2.48708e-06	0.00141258
H3114C06			EST	2.50848e-06	0.00137724
H3011C02	Mm.271798	Htf9c	HpaII tiny fragments locus 9c	2.54115e-06	0.00135017
H3013C02	Mm.234464	Dnd1	dead end homolog 1 (zebrafish)	2.57746e-06	0.00132667
H3135D11	Mm.646	Tpm2	tropomyosin 2, beta	2.6199e-06	0.00130765
H3012B06	Mm.277629	Ppp1ca	protein phosphatase 1, catalytic subunit, alpha isoform	2.64025e-06	0.00127905
H3115D03	Mm.296482		Mus musculus similar to WTAP protein (LOC210245), mRNA	2.84918e-06	0.00134083
H3118D03	Mm.298083	Arbp	acidic ribosomal phosphoprotein P0	2.89449e-06	0.00132431
H3024E09			EST	2.9434e-06	0.00131029
H3109H09	Mm.27291	Bysl	bystin-like	2.95208e-06	0.00127957
H3027H08	Mm.261329	1500001M02Rik	RIKEN cDNA 1500001M02 gene	2.98563e-06	0.00126093
H3029D07	Mm.28203	D11Ertd175e	DNA segment, Chr 11, ERATO Doi 175, expressed	2.99131e-06	0.00123175
H3079A03			EST	3.02713e-06	0.0012161
H3138B01	Mm.8073	Bche	butyrylcholinesterase	3.13696e-06	0.00123021
T336	Mm.251322	Eno3	enolase 3, beta muscle	3.1633e-06	0.00121169
H3044H04	Mm.224452	AA536749	expressed sequence AA536749	3.17761e-06	0.00118951
H3149E05	Mm.285467	Agt	angiotensinogen	3.24513e-06	0.00118779
H3112E03			EST	3.42517e-06	0.00122644
H3115D04	Mm.4071	Lamr1	laminin receptor 1 (ribosomal protein SA)	3.54719e-06	0.0012431
H3039B09	Mm.22584	Strap	serine/threonine kinase receptor associated protein	3.65155e-06	0.00125302
H3127D01	Mm.88216	Snrpb	small nuclear ribonucleoprotein B	3.6951e-06	0.00124208
H3146B08	Mm.26700	AU040576	expressed sequence AU040576	3.70503e-06	0.00122051
H3007D02	Mm.2344	Gnb1	guanine nucleotide binding protein, beta 1	3.81474e-06	0.00123201
H3040D03	Mm.22094	BC024558	cDNA sequence BC024558	4.05219e-06	0.00128353
P593	Mm.294136	Ccnd2	cyclin D2	4.23092e-06	0.00131486
H3119B01			EST	4.3129e-06	0.00131551
H3012A05	Mm.208750	AI413782	expressed sequence AI413782	4.71511e-06	0.00141205
H3007F11	Mm.36699	9430029K10Rik	RIKEN cDNA 9430029K10 gene	4.83871e-06	0.00142319
H3150B09	Mm.25157	2410001C21Rik	RIKEN cDNA 2410001C21 gene	4.92955e-06	0.00142447
H3118F11	Mm.143167	D15Ertd785e	DNA segment, Chr 15, ERATO Doi 785, expressed	5.03383e-06	0.00142952
H3044H02	Mm.193526	Csda	cold shock domain protein A	5.0365e-06	0.00140604
H3009H04	Mm.4888	Rad50	RAD50 homolog (S. cerevisiae)	5.31465e-06	0.00145896
H3144F11	Mm.215034	Matr3	matrin 3	5.33014e-06	0.00143922
H3123C04	Mm.35708	Grcb	gene rich cluster, B gene	5.3566e-06	0.00142304
H3119B08	Mm.41	Atp5o	ATP synthase, H+ transporting, mitochondrial F1 complex, O subunit	5.43011e-06	0.00141967
H3010G01	Mm.296525	1110039I09Rik	RIKEN cDNA 1110039I09 gene	5.52695e-06	0.00142241
H3101E03	Mm.203556	BC003494	cDNA sequence BC003494	5.57654e-06	0.0014131
P938	Mm.42195	Ruvbl1	RuvB-like protein 1	5.78813e-06	0.00144449
H3082E06	Mm.275648	1110003B01Rik	RIKEN cDNA 1110003B01 gene	5.90693e-06	0.00145213
H3154H03			EST	5.95969e-06	0.00144356
H3158H12	Mm.24788	2310047M15Rik	RIKEN cDNA 2310047M15 gene	6.0204e-06	0.00143713
H3009F11	Mm.13705	Rrbp1	ribosome binding protein 1	6.04777e-06	0.00142304
H3121B07			EST	6.24865e-06	0.0014496
H3027H04	Mm.123366	2410002K23Rik	RIKEN cDNA 2410002K23 gene	6.35036e-06	0.00145273
H3094F12	Mm.27832	Ralb	v-ral simian leukemia viral oncogene homolog B (ras related)	6.39179e-06	0.00144218
H3147E04	Mm.2180	Hspcb	heat shock protein 1, beta	6.41498e-06	0.00142785
H3136D03	Mm.222825	1700015E05Rik	RIKEN cDNA 1700015E05 gene	6.51857e-06	0.00143157
H3146C08	Mm.4933	Mcm6	minichromosome maintenance deficient 6 (MIS5 homolog, S. pombe) (S. cerevisiae)	6.53032e-06	0.00141527
H3110F12	Mm.294777	1300010O06Rik	RIKEN cDNA 1300010O06 gene	6.66117e-06	0.00142489
T289	Mm.260925	Gna11	guanine nucleotide binding protein, alpha 11	6.67136e-06	0.00140877
T337	Mm.275831	Aldo1	aldolase 1, A isoform	7.21071e-06	0.00150339
H3031A07	Mm.245357	G630041M05Rik	RIKEN cDNA G630041M05 gene	7.24429e-06	0.00149151
H3024D01	Mm.227260	4930542G03Rik	RIKEN cDNA 4930542G03 gene	7.30323e-06	0.00148508
H3072F03	Mm.183110	Tk2	thymidine kinase 2, mitochondrial	7.52931e-06	0.00151238
H3100D12	Mm.22538	Zdhhc12	zinc finger, DHHC domain containing 12	7.58369e-06	0.00150495
H3110F02	Mm.289900	Cct7	chaperonin subunit 7 (eta)	7.88716e-06	0.00154654
H3114H04	Mm.247762	2610301D06Rik	RIKEN cDNA 2610301D06 gene	7.92539e-06	0.00153575
H3076C05	Mm.7142	Mbd3	methyl-CpG binding domain protein 3	7.99601e-06	0.00153142
H3024B03	Mm.256034	Cct3	chaperonin subunit 3 (gamma)	8.0958e-06	0.00153271
H3020B03	Mm.1424	Ext1	exostoses (multiple) 1	8.12355e-06	0.00152049
H3009B02	Mm.224452	AA536749	expressed sequence AA536749	8.43773e-06	0.00156155
H3047H01	Mm.178818	D8Ertd325e	DNA segment, Chr 8, ERATO Doi 325, expressed	8.46469e-06	0.00154913
H3149D12	Mm.291443	Lysal1	lysosomal apyrase-like 1	8.68085e-06	0.00157123
H3100G06	Mm.27546	Ipo4	importin 4	8.75227e-06	0.00156694
H3054B09	Mm.143167	D15Ertd785e	DNA segment, Chr 15, ERATO Doi 785, expressed	8.82783e-06	0.00156348
H3047C02			EST	8.85653e-06	0.00155187
H3009D12	Mm.4691	Nid1	nidogen 1	8.98015e-06	0.00155697
H3052C10	Mm.152941	Usp16	ubiquitin specific protease 16	9.2292e-06	0.00158348
H3125D09	Mm.180337	3110002K08Rik	RIKEN cDNA 3110002K08 gene	9.23548e-06	0.00156822
H3062E02	Mm.37879	Vps33b	vacuolar protein sorting 33B (yeast)	9.32584e-06	0.00156741
H3054D01	Mm.295013	Vps11	vacuolar protein sorting 11 (yeast)	9.43191e-06	0.00156922
T024	Mm.246965	Sdhb	succinate dehydrogenase complex, subunit B, iron sulfur (Ip)	9.4827e-06	0.00156189
H3016F03	Mm.195249	Timm44	translocator of inner mitochondrial membrane 44	9.52169e-06	0.00155279
H3113F06	Mm.279485	Rnh1	ribonuclease/angiogenin inhibitor 1	9.56107e-06	0.00154393
H3116F10	Mm.229404		Mus musculus transcribed sequence with weak similarity to protein pir:I58401 (M.musculus) I58401 protein-tyrosine kinase (EC 2.7.1.112) JAK3 - mouse	9.64116e-06	0.00154174
H3052D04			EST	9.65428e-06	0.001529
H3006D04	Mm.1401	Cxcr4	chemokine (C-X-C motif) receptor 4	9.67869e-06	0.00151826
H3027C09	Mm.31567	3010027A04Rik	RIKEN cDNA 3010027A04 gene	9.69136e-06	0.00150591
H3103D04	Mm.29133	Bub1b	budding uninhibited by benzimidazoles 1 homolog, beta (S. cerevisiae)	9.69373e-06	0.0014922
H3011G04	Mm.255194	Rnf26	ring finger protein 26	9.73781e-06	0.00148511
H3008G01	Mm.288982	2610103J23Rik	RIKEN cDNA 2610103J23 gene	9.77387e-06	0.00147693
H3099C10			EST	9.77616e-06	0.00146385
H3124A01	Mm.980	Tnc	tenascin C	9.94765e-06	0.00147611
H3126F02	Mm.38878	A630053O10	hypothetical protein A630053O10	1.00708e-05	0.00148103
H3047G08	Mm.272878	Crebbp	CREB binding protein	1.00964e-05	0.00147166
H3082G02	Mm.305983		Mus musculus transcribed sequences	1.03054e-05	0.00148895
H3026F07	Mm.289900	Cct7	chaperonin subunit 7 (eta)	1.0313e-05	0.00147709
H3037G04	Mm.286602	Cdc25c	cell division cycle 25 homolog C (S. cerevisiae)	1.03973e-05	0.00147633
H3141A08	Mm.246863	1500019O16Rik	RIKEN cDNA 1500019O16 gene	1.04099e-05	0.00146549
H3018C03	Mm.4700	Ercc1	excision repair cross-complementing rodent repair deficiency, complementation group 1	1.04772e-05	0.00146245
H3032H07	Mm.233181	4933407C03Rik	RIKEN cDNA 4933407C03 gene	1.05225e-05	0.00145644
H3024F07	Mm.41502	Fh1	fumarate hydratase 1	1.07784e-05	0.00147943
H3147A06	Mm.239117	BC039161	cDNA sequence BC039161	1.10663e-05	0.00150638
H3105A05	Mm.271854	Lrp1	low density lipoprotein receptor-related protein 1	1.11317e-05	0.00150286
H3014C11	Mm.29105	Gtf3a	general transcription factor III A	1.11555e-05	0.00149385
H3008H07	Mm.208750	AI413782	expressed sequence AI413782	1.13e-05	0.00150099
H3050B04	Mm.172902		Mus musculus transcribed sequences	1.25636e-05	0.00165548
H3013B05			EST	1.27156e-05	0.00166222
H3082F06	Mm.4259	Tacstd1	tumor-associated calcium signal transducer 1	1.27741e-05	0.00165671
H3131D03	Mm.100065	1300012G16Rik	RIKEN cDNA 1300012G16 gene	1.28081e-05	0.00164814
H3035E03	Mm.6419	BC004044	cDNA sequence BC004044	1.29914e-05	0.00165877
H3154B08			EST	1.3347e-05	0.00169107
H3006F03	Mm.296221	Dlst	dihydrolipoamide S-succinyltransferase (E2 component of 2-oxo-glutarate complex)	1.33534e-05	0.00167896
H3001F02			EST	1.33812e-05	0.00166971
T468	Mm.3399	Traf2	Tnf receptor-associated factor 2	1.35429e-05	0.00167718
H3012B04	Mm.58836	Cs	citrate synthase	1.39529e-05	0.00171506
H3022G10	Mm.268334	Abcf1	ATP-binding cassette, sub-family F (GCN20), member 1	1.40809e-05	0.00171798
H3045H04	Mm.29677	Myh9	myosin heavy chain IX	1.44477e-05	0.00174976
H3158B09			EST	1.52591e-05	0.00183455
H3130B01	Mm.280083	2010004J23Rik	RIKEN cDNA 2010004J23 gene	1.54643e-05	0.00184575
H3041H07			EST	1.55823e-05	0.00184645
H3024B04	Mm.256034	Cct3	chaperonin subunit 3 (gamma)	1.61095e-05	0.00189529
H3144H11	Mm.289431	Eef2	eukaryotic translation elongation factor 2	1.65493e-05	0.00193321
H3156A04	Mm.29457	4632415N18Rik	RIKEN cDNA 4632415N18 gene	1.67215e-05	0.00193957
H3158F11	Mm.38344	Nnp1	novel nuclear protein 1	1.6775e-05	0.00193217
H3011E01	Mm.30066	Rpl8	ribosomal protein L8	1.67928e-05	0.00192079
H3133D12	Mm.262053	Vcp	valosin containing protein	1.69597e-05	0.0019265
H3040B05	Mm.275436	Map2k2	mitogen activated protein kinase kinase 2	1.69686e-05	0.00191432
H3055F08	Mm.227759		Mus musculus 16 days embryo head cDNA, RIKEN full-length enriched library, clone:C130033P17 product:unknown EST, full insert sequence	1.70606e-05	0.0019116
H3052B12			EST	1.75066e-05	0.00194832
H3036D07			EST	1.75581e-05	0.00194093
H3016C12	Mm.42195	Ruvbl1	RuvB-like protein 1	1.75875e-05	0.00193123
H3007A11	Mm.139166	AF155546	cDNA sequence AF155546	1.76394e-05	0.0019241
H3118B12	Mm.151203	Pkm2	pyruvate kinase, muscle	1.77378e-05	0.0019221
H3114A05	Mm.297465		Mus musculus similar to Phospholipid hydroperoxide glutathione peroxidase, mitochondrial precursor (PHGPx) (GPX-4) (LOC380677), mRNA	1.78123e-05	0.00191756
H3146H08			EST	1.7867e-05	0.00191096
H3027H02	Mm.218423	2010110K24Rik	RIKEN cDNA 2010110K24 gene	1.78973e-05	0.00190184
H3073F10	Mm.19306	Capn2	calpain 2	1.79746e-05	0.00189782
H3026F08	Mm.289900	Cct7	chaperonin subunit 7 (eta)	1.80669e-05	0.00189541
H3147B03	Mm.271770	Myl9	myosin, light polypeptide 9, regulatory	1.81893e-05	0.00189618
H3064H02	Mm.25836	Cldn8	claudin 8	1.87858e-05	0.00194605
H3008B11	Mm.6215	Fosl1	fos-like antigen 1	1.88909e-05	0.00194471
H3134C11	Mm.250004	Gars	glycyl-tRNA synthetase	1.89045e-05	0.00193401
H3016B08	Mm.38055	Es10	esterase 10	1.95681e-05	0.00198955
H3122F01	Mm.238973	Atp5b	ATP synthase, H+ transporting mitochondrial F1 complex, beta subunit	2.00838e-05	0.00202945
H3013H11	Mm.3752	Ranbp1	RAN binding protein 1	2.02152e-05	0.00203027
H3024B05	Mm.256034	Cct3	chaperonin subunit 3 (gamma)	2.03424e-05	0.00203066
H3134B06	Mm.157105	Psmc1	protease (prosome, macropain) 26S subunit, ATPase 1	2.07603e-05	0.00205989
H3031H04	Mm.6424	Itgb5	integrin beta 5	2.11138e-05	0.00208243
H3092H11			EST	2.11769e-05	0.00207622
H3124A07	Mm.227183	Eif4el3	eukaryotic translation initiation factor 4E like 3	2.12325e-05	0.00206935
H3015E03	Mm.299003	Pbp	phosphatidylethanolamine binding protein	2.13714e-05	0.00207064
H3109B05	Mm.282359	Ltf	lactotransferrin	2.14336e-05	0.00206452
H3021F04	Mm.13823	Dph2l2	diptheria toxin resistance protein required for diphthamide biosynthesis (Saccharomyces)-like 2	2.14517e-05	0.00205425
H3035C11			EST	2.1545e-05	0.00205126
H3040A01	Mm.252213	Baz2a	bromodomain adjacent to zinc finger domain, 2A	2.15685e-05	0.00204169
H3128E08	Mm.157216	C78541	expressed sequence C78541	2.17388e-05	0.00204605
H3052F08	Mm.284491	3200002M19Rik	RIKEN cDNA 3200002M19 gene	2.19009e-05	0.0020496
H3146D07	Mm.29802	BC005632	cDNA sequence BC005632	2.20161e-05	0.00204874
H3014H07	Mm.22929	Yars	tyrosyl-tRNA synthetase	2.21764e-05	0.00205207
H3135B09	Mm.182718		Mus musculus transcribed sequences	2.22258e-05	0.00204514
H3005B03	Mm.210155	Txnrd1	thioredoxin reductase 1	2.24375e-05	0.00205316
T373	Mm.6700	Eif4ebp1	eukaryotic translation initiation factor 4E binding protein 1	2.24634e-05	0.00204417
H3119B04	Mm.285724	Hspa8	heat shock protein 8	2.2523e-05	0.00203833
H3066G05	Mm.159915	D1Ucla4	DNA segment, Chr 1, University of California at Los Angeles 4	2.25717e-05	0.00203158
H3055B05	Mm.247080	Lsm7	LSM7 homolog, U6 small nuclear RNA associated (S. cerevisiae)	2.26487e-05	0.00202743
H3011G11	Mm.154387	Tkt	transketolase	2.2759e-05	0.00202629
H3026B07	Mm.6836	Arf1	ADP-ribosylation factor 1	2.28072e-05	0.00201966
H3009G09	Mm.27608	1110008P14Rik	RIKEN cDNA 1110008P14 gene	2.30545e-05	0.00203065
H3014A01	Mm.216250	Mrps10	mitochondrial ribosomal protein S10	2.31575e-05	0.00202887
H3028B12	Mm.259667	Rbms1	RNA binding motif, single stranded interacting protein 1	2.33149e-05	0.00203185
H3127C11	Mm.286988	Nisch	nischarin	2.33967e-05	0.00202825
H3093B09	Mm.71015	2700053F16Rik	RIKEN cDNA 2700053F16 gene	2.40307e-05	0.0020723
H3157B08	Mm.245446		Mus musculus RIKEN cDNA 1810043M20 gene, mRNA (cDNA clone IMAGE:5057410), partial cds	2.41353e-05	0.00207048
H3002C07	Mm.646	Tpm2	tropomyosin 2, beta	2.44455e-05	0.00208622
P661	Mm.30357	Ftl1	ferritin light chain 1	2.49839e-05	0.00212119
H3135C10	Mm.234455	Slc30a9	solute carrier family 30 (zinc transporter), member 9	2.51431e-05	0.00212375
H3044G06	Mm.296908		Mus musculus similar to 3-phosphoglycerate dehydrogenase (LOC233938), mRNA	2.56443e-05	0.00215503
H3024B08	Mm.5286	Arbp	acidic ribosomal phosphoprotein P0	2.59174e-05	0.00216693
H3017E01	Mm.288508	Zdhhc5	zinc finger, DHHC domain containing 5	2.5999e-05	0.00216277
H3055D06			EST	2.64151e-05	0.00218635
H3047B05	Mm.276381	Tnpo3	transportin 3	2.65316e-05	0.00218501
H3142D12	Mm.3655	Rad54l	RAD54 like (S. cerevisiae)	2.68533e-05	0.0022005
H3027C01	Mm.28203	D11Ertd175e	DNA segment, Chr 11, ERATO Doi 175, expressed	2.69222e-05	0.00219523
H3113A10	Mm.30806	Rpl19	ribosomal protein L19	2.69435e-05	0.00218614
H3011C06	Mm.7091	Ssr2	signal sequence receptor, beta	2.69566e-05	0.00217648
H3006H01	Mm.186936	1110032A13Rik	RIKEN cDNA 1110032A13 gene	2.70932e-05	0.00217684
H3137B10	Mm.290516	Glb1	galactosidase, beta 1	2.73838e-05	0.00218951
H3048H11			EST	2.75372e-05	0.00219114
H3133C01	Mm.13886	Sui1-rs1	suppressor of initiator codon mutations, related sequence 1 (S. cerevisiae)	2.77324e-05	0.00219606
H3147A03	Mm.282158	Cct5	chaperonin subunit 5 (epsilon)	2.80825e-05	0.00221315
H3011B04			EST	2.83976e-05	0.00222732
T378	Mm.8681	Ptpn11	protein tyrosine phosphatase, non-receptor type 11	2.86455e-05	0.00223611
H3139C10			EST	2.87908e-05	0.00223686
H3023B09	Mm.6118	Snx17	sorting nexin 17	2.94411e-05	0.00227664
H3028F02	Mm.27330	Smarce1	SWI/SNF related, matrix associated, actin dependent regulator of chromatin, subfamily e, member 1	2.94486e-05	0.00226658
H3025B03	Mm.193096	Scd2	stearoyl-Coenzyme A desaturase 2	2.94954e-05	0.00225962
H3121H08			EST	2.95041e-05	0.00224982
H3033B09	Mm.312508		Mus musculus transcribed sequences	2.9616e-05	0.00224795
H3026H01	Mm.289832	Psmc3	proteasome (prosome, macropain) 26S subunit, ATPase 3	3.03274e-05	0.00229139
H3019C10	Mm.263862	Phb	prohibitin	3.05295e-05	0.00229613
H3004C06	Mm.34776	2810036M19Rik	RIKEN cDNA 2810036M19 gene	3.06063e-05	0.00229144
H3045H03	Mm.28999	0610033H09Rik	RIKEN cDNA 0610033H09 gene	3.08597e-05	0.00229996
H3125A07	Mm.22708	Serpinh1	serine (or cysteine) proteinase inhibitor, clade H, member 1	3.10611e-05	0.00230454
H3003D08	Mm.247037	Bag2	Bcl2-associated athanogene 2	3.11649e-05	0.00230187
H3094G04	Mm.134191	Sfxn1	sideroflexin 1	3.13066e-05	0.00230201
H3022F03	Mm.268304	Trpc4ap	transient receptor potential cation channel, subfamily C, member 4 associated protein	3.14137e-05	0.00229963
H3130H05	Mm.292208	Hdgf	hepatoma-derived growth factor	3.1544e-05	0.00229894
H3091G06	Mm.27223	C230060M08Rik	RIKEN cDNA C230060M08 gene	3.16854e-05	0.00229908
H3063H12	Mm.249586	Bup	Bmi1 upstream gene	3.18616e-05	0.00230172
P301	Mm.298306	Rpl29	ribosomal protein L29	3.1956e-05	0.00229846
H3052B11	Mm.28130	Pctk3	PCTAIRE-motif protein kinase 3	3.19773e-05	0.00228999
H3017F05	Mm.243014	Lmna	lamin A	3.22633e-05	0.00230047
H3113D04	Mm.296756	Rpl12	ribosomal protein L12	3.30673e-05	0.00234764
H3135C12	Mm.211654	MGC6357	hypothetical protein MGC6357	3.32331e-05	0.00234928
H3128A11	Mm.262345	Pcolce	procollagen C-proteinase enhancer protein	3.37488e-05	0.00237554
H3126D05	Mm.259345	Rpl27	ribosomal protein L27	3.38345e-05	0.00237144
H3124A08	Mm.34008	BC023296	cDNA sequence BC023296	3.39662e-05	0.00237058
H3010C02	Mm.49309	A630029F06	hypothetical protein A630029F06	3.41655e-05	0.00237443
H3132A10			EST	3.42733e-05	0.00237191
H3128D07	Mm.29041	C85417	expressed sequence C85417	3.4295e-05	0.00236348
H3018B01	Mm.6877	Ap2a1	adaptor protein complex AP-2, alpha 1 subunit	3.43197e-05	0.00235534
H3144D07	Mm.26789	Csnk2b	casein kinase II, beta subunit	3.4584e-05	0.00236363
H3002F03	Mm.16479	Dusp9	dual specificity phosphatase 9	3.48497e-05	0.00237194
H3012B07			EST	3.52559e-05	0.00238971
H3155A03	Mm.25157	2410001C21Rik	RIKEN cDNA 2410001C21 gene	3.5603e-05	0.00240335
H3078H10	Mm.6836	Arf1	ADP-ribosylation factor 1	3.57992e-05	0.00240673
H3046D07	Mm.235898	Supv3l1	suppressor of var1, 3-like 1 (S. cerevisiae)	3.58097e-05	0.00239765
T260	Mm.196189	Angptl4	angiopoietin-like 4	3.58871e-05	0.0023931
H3124H01	Mm.8688	Ndufb10	NADH dehydrogenase (ubiquinone) 1 beta subcomplex, 10	3.60408e-05	0.00239366
H3021G04	Mm.193035	Rad9	RAD9 homolog (S. pombe)	3.60935e-05	0.00238754
H3048B03	Mm.168478	4930432B04Rik	RIKEN cDNA 4930432B04 gene	3.62124e-05	0.00238582
H3024D07	Mm.258633	Stip1	stress-induced phosphoprotein 1	3.63475e-05	0.00238518
H3024H01	Mm.271062	Ict1	immature colon carcinoma transcript 1	3.64434e-05	0.00238198
H3051A01			EST	3.67063e-05	0.00238968
H3115G05	Mm.16423	Rpl35	ribosomal protein L35	3.68909e-05	0.00239224
H3021C05	Mm.275554	1100001D10Rik	RIKEN cDNA 1100001D10 gene	3.70284e-05	0.00239174
H3051A07	Mm.7723	Pabpn1	poly(A) binding protein, nuclear 1	3.7085e-05	0.00238604
H3024C12	Mm.227260	4930542G03Rik	RIKEN cDNA 4930542G03 gene	3.71739e-05	0.00238246
H3013C01	Mm.291745	D1Wsu40e	DNA segment, Chr 1, Wayne State University 40, expressed	3.72252e-05	0.0023765
T003	Mm.589	Gpi1	glucose phosphate isomerase 1	3.77505e-05	0.00240073
P827	Mm.980	Tnc	tenascin C	3.79698e-05	0.00240539
T310			EST	3.80912e-05	0.00240383
H3028H07	Mm.295013	Vps11	vacuolar protein sorting 11 (yeast)	3.81157e-05	0.0023962
H3021G01	Mm.251710	Fstl3	follistatin-like 3	3.83301e-05	0.00240052
H3013A04	Mm.27445	Fbxo6b	F-box only protein 6b	3.88385e-05	0.00242314
H3010D05	Mm.20818	2600002E23Rik	RIKEN cDNA 2600002E23 gene	3.89046e-05	0.00241811
H3045D06	Mm.18347	Psmd7	proteasome (prosome, macropain) 26S subunit, non-ATPase, 7	3.89051e-05	0.00240905
H3022H12	Mm.331011		Mus musculus transcribed sequences	3.9111e-05	0.00241272
H3010G04	Mm.4336	Ext2	exostoses (multiple) 2	3.92424e-05	0.00241179
H3081B09			EST	3.99106e-05	0.00244375
H3142H08	Mm.24997	Ptdsr	phosphatidylserine receptor	3.99312e-05	0.00243595
H3141E04	Mm.272186	p47	p47 protein	4.06842e-05	0.00247273
H3008C09	Mm.2180	Hspcb	heat shock protein 1, beta	4.0846e-05	0.00247343
H3059B07	Mm.289657	Jak1	Janus kinase 1	4.09234e-05	0.00246905
H3014D07	Mm.3196	G2an	alpha glucosidase 2, alpha neutral subunit	4.11959e-05	0.00247641
H3119F10			EST	4.12398e-05	0.00247004
H3096G02	Mm.70065		Mus musculus 2 days neonate thymus thymic cells cDNA, RIKEN full-length enriched library, clone:E430020E24 product:unknown EST, full insert sequence	4.16566e-05	0.00248596
T084	Mm.22668	Hmgcl	3-hydroxy-3-methylglutaryl-Coenzyme A lyase	4.20257e-05	0.00249894
H3047D02	Mm.16773	Alb1	albumin 1	4.21207e-05	0.00249558
H3150G02	Mm.28379	Nup50	nucleoporin 50	4.22484e-05	0.00249417
H3127A04	Mm.123110	Spnb2	spectrin beta 2	4.24164e-05	0.00249514
H3024C11	Mm.296383	Hspca	heat shock protein 1, alpha	4.25485e-05	0.00249401
H3024C07	Mm.2284	Hexa	hexosaminidase A	4.32189e-05	0.00252432
H3124H08	Mm.331	Ubc	ubiquitin C	4.3238e-05	0.00251651
H3024B12	Mm.21414	Ccs	copper chaperone for superoxide dismutase	4.33444e-05	0.00251383
H3038D07	Mm.24972	Mvp	major vault protein	4.37831e-05	0.00253035
H3154C08			EST	4.43114e-05	0.00255193
H3156E08	Mm.30153	2410166I05Rik	RIKEN cDNA 2410166I05 gene	4.468e-05	0.0025642
H3096E10	Mm.227983	1110059P08Rik	RIKEN cDNA 1110059P08 gene	4.46918e-05	0.00255596
H3030G06	Mm.269649	Pfkl	phosphofructokinase, liver, B-type	4.47251e-05	0.00254902
H3096C04			EST	4.63069e-05	0.00263007
H3012B11	Mm.290786	Rpl41	ribosomal protein L41	4.66303e-05	0.00263934
H3040B10	Mm.2437	Bing4	BING4 protein	4.68872e-05	0.00264479
H3031D10	Mm.200413	Nsep1	nuclease sensitive element binding protein 1	4.6907e-05	0.00263688
H3031B01	Mm.27135	Abcf3	ATP-binding cassette, sub-family F (GCN20), member 3	4.7055e-05	0.0026362
H3010G06	Mm.18626	Capg	capping protein (actin filament), gelsolin-like	4.70891e-05	0.00262917
H3005G06	Mm.2412	Ppib	peptidylprolyl isomerase B	4.81561e-05	0.00267966
H3151E02			EST	4.88811e-05	0.00271084
H3030H08	Mm.22668	Hmgcl	3-hydroxy-3-methylglutaryl-Coenzyme A lyase	4.92379e-05	0.00272147
H3128D12	Mm.331089		Mus musculus transcribed sequence with weak similarity to protein ref:NP_114187.1 (R.norvegicus) p47 protein [Rattus norvegicus]	4.93274e-05	0.0027173
H3124H09	Mm.331	Ubc	ubiquitin C	4.97797e-05	0.00273307
H3011F02			EST	4.99473e-05	0.00273316
H3128D11	Mm.100380		Mus musculus, clone IMAGE:3371882, mRNA, partial cds	5.06336e-05	0.00276155
H3156G08			EST	5.12542e-05	0.00278617
H3024H03			EST	5.17876e-05	0.0028059
H3129B11	Mm.289431	Eef2	eukaryotic translation elongation factor 2	5.18361e-05	0.00279932
H3127C05	Mm.236513	Pcbp2	poly(rC) binding protein 2	5.21689e-05	0.00280808
H3054E03			EST	5.24312e-05	0.00281301
H3044G04	Mm.25044	Fliih	flightless I homolog (Drosophila)	5.25317e-05	0.00280925
H3022B06	Mm.123714	Triobp	TRIO and F-actin binding protein	5.27388e-05	0.0028112
H3110H07			EST	5.28854e-05	0.00280992
H3030F01	Mm.12194	Psmd3	proteasome (prosome, macropain) 26S subunit, non-ATPase, 3	5.29879e-05	0.00280631
H3115D02	Mm.4071	Lamr1	laminin receptor 1 (ribosomal protein SA)	5.34384e-05	0.0028211
H3147H04	Mm.291482	1810057E01Rik	RIKEN cDNA 1810057E01 gene	5.37703e-05	0.00282955
T072	Mm.10124	Chkl	choline kinase-like	5.49034e-05	0.00287998
H3030A11	Mm.100353	Tbl3	transducin (beta)-like 3	5.49085e-05	0.0028711
H3016G06	Mm.298306	Rpl29	ribosomal protein L29	5.49149e-05	0.00286235
H3033F01	Mm.197829	2300002G02Rik	RIKEN cDNA 2300002G02 gene	5.50383e-05	0.00285973
H3007B08	Mm.953	Smpd2	sphingomyelin phosphodiesterase 2, neutral	5.52159e-05	0.00285994
H3145E04	Mm.287407	B230208H17Rik	RIKEN cDNA B230208H17 gene	5.54021e-05	0.00286059
H3108B03	Mm.277327	H13	histocompatibility 13	5.54613e-05	0.0028547
H3048E05	Mm.271071	Lta4h	leukotriene A4 hydrolase	5.59277e-05	0.00286973
H3032C05	Mm.30068	Sgta	small glutamine-rich tetratricopeptide repeat (TPR)-containing, alpha	5.64651e-05	0.00288831
H3025D12	Mm.273538	Tubb5	tubulin, beta 5	5.66815e-05	0.00289041
H3042H05	Mm.308756		Mus musculus BALB/c 3T3mou non-muscle alpha-actinin (FR-17) mRNA, partial cds.	5.67893e-05	0.00288697
H3042G07	Mm.2180	Hspcb	heat shock protein 1, beta	5.69943e-05	0.00288847
H3040D07			EST	5.73125e-05	0.00289569
H3002F12	Mm.12973	Cops7b	COP9 (constitutive photomorphogenic) homolog, subunit 7b (Arabidopsis thaliana)	5.73436e-05	0.0028884
H3066F05			EST	5.76018e-05	0.00289256
H3031B06	Mm.99776	Xpnpep1	X-prolyl aminopeptidase (aminopeptidase P) 1, soluble	5.77209e-05	0.00288973
H3064C01	Mm.34456	2400003N08Rik	RIKEN cDNA 2400003N08 gene	5.78503e-05	0.00288743
H3063E03	Mm.192893		Mus musculus transcribed sequences	5.78704e-05	0.00287971
H3027H10	Mm.29363	Nol5a	nucleolar protein 5A	5.81367e-05	0.00288424
H3008H04	Mm.124328	Sp3	trans-acting transcription factor 3	5.84984e-05	0.00289347
H3150G08	Mm.24632	C76800	expressed sequence C76800	5.91462e-05	0.00291676
H3123D06			EST	5.99962e-05	0.00294984
H3140F10	Mm.280083	2010004J23Rik	RIKEN cDNA 2010004J23 gene	6.02096e-05	0.00295153
H3139D11			EST	6.19966e-05	0.00303011
H3006A09			EST	6.26756e-05	0.00305423
H3137E02	Mm.21669	Ndufs2	NADH dehydrogenase (ubiquinone) Fe-S protein 2	6.27616e-05	0.0030494
H3020H11			EST	6.28153e-05	0.00304303
H3056B01			EST	6.33954e-05	0.00306213
H3013G02	Mm.24867	Stx4a	syntaxin 4A (placental)	6.3658e-05	0.00306582
H3022E08	Mm.196137	1300006N24Rik	RIKEN cDNA 1300006N24 gene	6.37817e-05	0.00306282
H3034B09	Mm.22633	Dgat1	diacylglycerol O-acyltransferase 1	6.39732e-05	0.00306309
H3157G09	Mm.131524		Mus musculus 0 day neonate cerebellum cDNA, RIKEN full-length enriched library, clone:C230006B20 product:unknown EST, full insert sequence	6.44693e-05	0.00307789
H3009H09	Mm.833	Ap1s1	adaptor protein complex AP-1, sigma 1	6.45811e-05	0.00307432
H3058H03	Mm.102097		Mus musculus transcribed sequences	6.48658e-05	0.00307898
H3018B04	Mm.276305	Dhx30	DEAH (Asp-Glu-Ala-His) box polypeptide 30	6.49114e-05	0.00307229
T361			EST	6.49776e-05	0.00306661
H3017A02	Mm.116749	Oaz2	ornithine decarboxylase antizyme 2	6.5411e-05	0.00307824
H3106B04	Mm.156565	BC023957	cDNA sequence BC023957	6.58824e-05	0.00309159
H3023F07	Mm.282158	Cct5	chaperonin subunit 5 (epsilon)	6.74991e-05	0.00315846
H3096A03	Mm.2136	Cox4i1	cytochrome c oxidase subunit IV isoform 1	6.7576e-05	0.0031531
H3119A04	Mm.298084	Atp5g1	ATP synthase, H+ transporting, mitochondrial F0 complex, subunit c (subunit 9), isoform 1	6.78644e-05	0.00315761
H3053H09			EST	6.78948e-05	0.00315013
H3014E12	Mm.27600		Mus musculus cDNA clone IMAGE:4976405, partial cds	6.80812e-05	0.0031499
H3012C09	Mm.30195	Gps1	G protein pathway suppressor 1	6.85242e-05	0.00316152
T167	Mm.10504	Pdpk1	3-phosphoinositide dependent protein kinase-1	6.96163e-05	0.00320293
T120	Mm.271854	Lrp1	low density lipoprotein receptor-related protein 1	6.98379e-05	0.00320418
H3022H01	Mm.154387	Tkt	transketolase	7.01513e-05	0.00320962
H3113E05			EST	7.02816e-05	0.00320667
H3104E06	Mm.196634	Abcc1	ATP-binding cassette, sub-family C (CFTR/MRP), member 1	7.11529e-05	0.00323746
H3023B07	Mm.22385	0710001K01Rik	RIKEN cDNA 0710001K01 gene	7.21583e-05	0.00327416
H3115A11	Mm.28498	Card4	caspase recruitment domain 4	7.22289e-05	0.00326836
H3039G12	Mm.291179	Xrn1	5'-3' exoribonuclease 1	7.28151e-05	0.00328586
H3050C02	Mm.252316	Gss	glutathione synthetase	7.35433e-05	0.00330965
H3031A11	Mm.214593	Prkcsh	protein kinase C substrate 80K-H	7.37929e-05	0.00331183
H3054C06	Mm.296842	Ppp1r14b	protein phosphatase 1, regulatory (inhibitor) subunit 14B	7.45075e-05	0.00333482
H3115F04	Mm.172947	Tfip11	tuftelin interacting protein 11	7.54925e-05	0.00336975
H3157C02	Mm.276502	1190005P08Rik	RIKEN cDNA 1190005P08 gene	7.58381e-05	0.00337602
H3027G09	Mm.4419	Rpl5	ribosomal protein L5	7.62575e-05	0.00338554
H3081F12	Mm.86595	Shc1	src homology 2 domain-containing transforming protein C1	7.69601e-05	0.00340755
H3030G02	Mm.37787	1700055P21Rik	RIKEN cDNA 1700055P21 gene	7.71897e-05	0.00340856
H3057F05	Mm.158705	9530020D24Rik	RIKEN cDNA 9530020D24 gene	7.73247e-05	0.00340539
H3132H04			EST	7.74917e-05	0.00340364
H3016E05	Mm.294351	Cdc37	cell division cycle 37 homolog (S. cerevisiae)	7.77886e-05	0.00340759
H3030F07	Mm.261735	Copb2	coatomer protein complex, subunit beta 2 (beta prime)	7.78076e-05	0.00339939
H3017H01	Mm.276293	Mrpl19	mitochondrial ribosomal protein L19	7.78154e-05	0.00339073
H3007D07	Mm.103522	Pwp2h	PWP2 (periodic tryptophan protein) homolog, yeast	7.80349e-05	0.00339133
H3015F06	Mm.21353	E030019A03Rik	RIKEN cDNA E030019A03 gene	7.82209e-05	0.00339046
H3075G08	Mm.4071	Lamr1	laminin receptor 1 (ribosomal protein SA)	7.84233e-05	0.00339032
H3030B07	Mm.2180	Hspcb	heat shock protein 1, beta	7.91589e-05	0.00341316
H3159F04	Mm.180622	1110032N12Rik	RIKEN cDNA 1110032N12 gene	7.91843e-05	0.00340534
H3047A08	Mm.298899	Phgdh	3-phosphoglycerate dehydrogenase	8.01854e-05	0.00343941
H3098B06	Mm.291820		Mus musculus transcribed sequence with moderate similarity to protein sp:Q9BQ67 (H.sapiens) GRWD_HUMAN Glutamate-rich WD repeat protein	8.04629e-05	0.00344235
H3145B04	Mm.237941	Ypel1	yippee-like 1 (Drosophila)	8.05936e-05	0.00343901
H3152A05	Mm.127378	4930586I02Rik	RIKEN cDNA 4930586I02 gene	8.06179e-05	0.00343115
H3096E09			EST	8.09951e-05	0.00343833
H3130F11	Mm.200557	AI428795	expressed sequence AI428795	8.1017e-05	0.00343041
H3033B08	Mm.2136	Cox4i1	cytochrome c oxidase subunit IV isoform 1	8.12857e-05	0.00343297
H3055A09	Mm.13944	3010033P07Rik	RIKEN cDNA 3010033P07 gene	8.14341e-05	0.00343044
H3027D08	Mm.258051	Nupl1	nucleoporin like 1	8.1502e-05	0.00342454
H3119G01	Mm.268000	Vim	vimentin	8.19514e-05	0.00343466
H3151A12	Mm.78861	Nolc1	nucleolar and coiled-body phosphoprotein 1	8.24978e-05	0.00344879
H3036B04	Mm.172632		Mus musculus transcribed sequences	8.29282e-05	0.003458
H3015F10	Mm.246863	1500019O16Rik	RIKEN cDNA 1500019O16 gene	8.32106e-05	0.00346101
H3016F06	Mm.234502	Myo1c	myosin IC	8.32719e-05	0.00345484
H3007B07	Mm.23987	Tirap	toll-interleukin 1 receptor (TIR) domain-containing adaptor protein	8.36761e-05	0.00346289
H3082A05	Mm.35105	5730461K03Rik	RIKEN cDNA 5730461K03 gene	8.39162e-05	0.00346412
H3138F12	Mm.3815	Sdc4	syndecan 4	8.40289e-05	0.0034601
H3005G12	Mm.291445	Mars	methionine-tRNA synthetase	8.40394e-05	0.0034519
H3012H03	Mm.244229	2410008G02Rik	RIKEN cDNA 2410008G02 gene	8.4268e-05	0.00345268
H3136G06	Mm.180458	Rpl13a	ribosomal protein L13a	8.46045e-05	0.00345787
H3132B03	Mm.296413	LOC234385	similar to KIAA0561 protein	8.462e-05	0.00344994
H3054D10			EST	8.50777e-05	0.00346004
H3031C02	Mm.3935	Ddx24	DEAD (Asp-Glu-Ala-Asp) box polypeptide 24	8.54519e-05	0.00346669
H3126H04	Mm.247762	2610301D06Rik	RIKEN cDNA 2610301D06 gene	8.60929e-05	0.00348412
H3045H01	Mm.146873	0610039N19Rik	RIKEN cDNA 0610039N19 gene	8.7203e-05	0.00352039
H3114H05	Mm.247762	2610301D06Rik	RIKEN cDNA 2610301D06 gene	8.73367e-05	0.00351717
H3071A12	Mm.209517		Mus musculus transcribed sequences	8.76619e-05	0.00352165
H3143D08	Mm.153061	Stx5a	syntaxin 5A	8.88532e-05	0.00356083
H3011G06	Mm.30357	Ftl1	ferritin light chain 1	8.88983e-05	0.00355399
H3125F12	Mm.18892	Emd	emerin	8.94132e-05	0.00356592
T421	Mm.56946	Pou3f4	POU domain, class 3, transcription factor 4	8.9958e-05	0.00357898
H3106H03	Mm.18742	Nupr1	nuclear protein 1	9.0873e-05	0.00360667
H3054B12	Mm.122705	Nfe2l2	nuclear, factor, erythroid derived 2, like 2	9.09027e-05	0.00359918
H3044H01	Mm.287443	Mrps18a	mitochondrial ribosomal protein S18A	9.14845e-05	0.00361353
H3019A08	Mm.30010	Arpc1b	actin related protein 2/3 complex, subunit 1B	9.16644e-05	0.00361197
H3019F11	Mm.158229	1500011L16Rik	RIKEN cDNA 1500011L16 gene	9.17414e-05	0.00360638
H3115H06	Mm.30357	Ftl1	ferritin light chain 1	9.20848e-05	0.00361126
H3017D09	Mm.29646	0610010E05Rik	RIKEN cDNA 0610010E05 gene	9.22263e-05	0.00360822
H3032C08	Mm.258633	Stip1	stress-induced phosphoprotein 1	9.22847e-05	0.00360195
H3152H09	Mm.29525	A730014M16Rik	RIKEN cDNA A730014M16 gene	9.27743e-05	0.0036125
H3038G12	Mm.140597	DXImx39e	DNA segment, Chr X, Immunex 39, expressed	9.41798e-05	0.00365857
H3105F07	Mm.128627	Dnclic1	dynein, cytoplasmic, light intermediate chain 1	9.49294e-05	0.00367902
H3027B10	Mm.613	Anp32a	acidic (leucine-rich) nuclear phosphoprotein 32 family, member A	9.55342e-05	0.00369376
H3016F05	Mm.260064	Eif3s4	eukaryotic translation initiation factor 3, subunit 4 (delta)	9.63835e-05	0.00371787
H3050D04	Mm.254169	D19Ertd386e	DNA segment, Chr 19, ERATO Doi 386, expressed	9.66376e-05	0.00371897
H3158F09	Mm.20841	Atp5e	ATP synthase, H+ transporting, mitochondrial F1 complex, epsilon subunit	9.77644e-05	0.00375356
T459	Mm.4618	D030041N15Rik	RIKEN cDNA D030041N15 gene	9.77751e-05	0.00374524
H3023E08	Mm.289775		Mus musculus transcribed sequence with weak similarity to protein pir:PIHUB6 (H.sapiens) PIHUB6 salivary proline-rich protein precursor PRB1 (large allele) - human	9.81827e-05	0.00375213
H3071F07			EST	9.89085e-05	0.00377111
H3034D08	Mm.245357	G630041M05Rik	RIKEN cDNA G630041M05 gene	9.90607e-05	0.00376819
H3063B02	Mm.259393		Mus musculus transcribed sequences	9.91659e-05	0.0037635
H3117D01	Mm.27839	D19Ertd721e	DNA segment, Chr 19, ERATO Doi 721, expressed	9.96777e-05	0.00377423
H3116G08	Mm.873	Snrp116	U5 small nuclear ribonucleoprotein	0.000100324	0.00379001
P355	Mm.289706	Lamb2	laminin, beta 2	0.000100995	0.00380659
H3020H06	Mm.258986	Mark2	MAP/microtubule affinity-regulating kinase 2	0.000101209	0.00380598
H3054E07	Mm.37985	2610019A05Rik	RIKEN cDNA 2610019A05 gene	0.000101366	0.00380319
H3016A11	Mm.289841	2810430M08Rik	RIKEN cDNA 2810430M08 gene	0.000101627	0.0038043
H3023H10	Mm.30357	Ftl1	ferritin light chain 1	0.000102152	0.0038153
H3146H05	Mm.291777	Taf5l	TAF5-like RNA polymerase II, p300/CBP-associated factor (PCAF)-associated factor	0.000103045	0.00383996
H3122B02			EST	0.000104218	0.00387489
H3124E11	Mm.213298	9030624J02Rik	RIKEN cDNA 9030624J02 gene	0.00010483	0.00388884
H3008D03	Mm.19937	Ggcx	gamma-glutamyl carboxylase	0.000105631	0.00390977
H3006F11	Mm.248779	4932434G09Rik	RIKEN cDNA 4932434G09 gene	0.000105829	0.00390832
H3098H09	Mm.21450	2310016E02Rik	RIKEN cDNA 2310016E02 gene	0.000106877	0.00393821
T017	Mm.58836	Cs	citrate synthase	0.000106934	0.0039315
H3024D10	Mm.40292	2610033H07Rik	RIKEN cDNA 2610033H07 gene	0.000107154	0.0039308
H3014H05	Mm.282084	Adrm1	adhesion regulating molecule 1	0.000107583	0.00393776
H3120B11	Mm.249146	Fbln2	fibulin 2	0.000107993	0.00394401
H3107E08	Mm.169542	C130074G19Rik	RIKEN cDNA C130074G19 gene	0.000108099	0.00393916
H3012G01	Mm.285849	Pfpl	pore forming protein-like	0.000108204	0.00393429
H3015A10	Mm.18939	Pmm1	phosphomannomutase 1	0.000108286	0.00392859
H3159F07			EST	0.000108487	0.00392721
H3032D06	Mm.298306	Rpl29	ribosomal protein L29	0.000109596	0.00395866
H3012B10			EST	0.000109854	0.0039593
H3087F03	Mm.25954		Mus musculus transcribed sequences	0.000110492	0.00397361
P817	Mm.26789	Csnk2b	casein kinase II, beta subunit	0.000110827	0.00397698
H3122A07	Mm.212832	D030049F17	hypothetical protein D030049F17	0.000110872	0.00396993
H3032A12	Mm.27210	G6pdx	glucose-6-phosphate dehydrogenase X-linked	0.000111058	0.00396796
H3100F07	Mm.27836	Tacc3	transforming, acidic coiled-coil containing protein 3	0.000112501	0.00401084
P890	Mm.30199	Csnk1e	casein kinase 1, epsilon	0.000112979	0.00401917
H3026D06	Mm.3308	Ywhah	tyrosine 3-monooxygenase/tryptophan 5-monooxygenase activation protein, eta polypeptide	0.000113539	0.00403039
P810	Mm.22665	Hdac5	histone deacetylase 5	0.000113688	0.004027
H3010A06	Mm.19091	D19Wsu55e	DNA segment, Chr 19, Wayne State University 55, expressed	0.00011379	0.00402195
H3024B09	Mm.5286	Arbp	acidic ribosomal phosphoprotein P0	0.000113804	0.00401386
T030	Mm.252080	Pgd	phosphogluconate dehydrogenase	0.000113888	0.00400822
H3032D09	Mm.38235	Rp9h	retinitis pigmentosa 9 homolog (human)	0.000114142	0.00400859
H3020B08	Mm.30357	Ftl1	ferritin light chain 1	0.000114696	0.0040195
H3148G10	Mm.105230	6330548N22Rik	RIKEN cDNA 6330548N22 gene	0.000114718	0.00401172
H3046F12	Mm.11688	2010310D06Rik	RIKEN cDNA 2010310D06 gene	0.00011499	0.00401271
H3078F06	Mm.253	2610510H01Rik	RIKEN cDNA 2610510H01 gene	0.000115379	0.00401778
H3140D11	Mm.322983		Mus musculus transcribed sequences	0.000116795	0.00405852
H3016A06	Mm.173826	4933427L07Rik	RIKEN cDNA 4933427L07 gene	0.000116919	0.00405427
H3100C01	Mm.12925	Pde6d	phosphodiesterase 6D, cGMP-specific, rod, delta	0.000117027	0.00404949
H3018B08	Mm.26995	Thop1	thimet oligopeptidase 1	0.000118069	0.00407697
H3111B07	Mm.4818	Cdk5	cyclin-dependent kinase 5	0.000118969	0.00409946
H3018H02	Mm.181860	2310057H16Rik	RIKEN cDNA 2310057H16 gene	0.000119043	0.00409345
H3022B04	Mm.291485	Tarbp2	TAR (HIV) RNA binding protein 2	0.000119403	0.00409725
P504	Mm.1167	Junb	Jun-B oncogene	0.000120977	0.00414264
H3021F08	Mm.289900	Cct7	chaperonin subunit 7 (eta)	0.000121419	0.00414914
H3153C03	Mm.28840	Rest	RE1-silencing transcription factor	0.000121581	0.00414609
H3147E06	Mm.2180	Hspcb	heat shock protein 1, beta	0.000121652	0.00413993
H3040B02	Mm.205045	Ddx41	DEAD (Asp-Glu-Ala-Asp) box polypeptide 41	0.000121707	0.00413327
H3015D02	Mm.25161	Sirt2	sirtuin 2 (silent mating type information regulation 2, homolog) 2 (S. cerevisiae)	0.000122242	0.0041429
H3027C03	Mm.40	Cops3	COP9 (constitutive photomorphogenic) homolog, subunit 3 (Arabidopsis thaliana)	0.000122361	0.00413842
H3030D11	Mm.151203	Pkm2	pyruvate kinase, muscle	0.000122765	0.00414358
H3027E08	Mm.70666	Eno1	enolase 1, alpha non-neuron	0.000122993	0.00414278
H3025D04	Mm.250874	Eif3s2	eukaryotic translation initiation factor 3, subunit 2 (beta)	0.000123675	0.00415723
H3011F09	Mm.298117	Fau	Finkel-Biskis-Reilly murine sarcoma virus (FBR-MuSV) ubiquitously expressed (fox derived)	0.000123741	0.004151
H3111G11	Mm.42578	Rpl13	ribosomal protein L13	0.000123852	0.00414628
H3030G05	Mm.298329		Mus musculus similar to hypothetical protein FLJ11749 (LOC208092), mRNA	0.000124666	0.00416507
H3029B04	Mm.268334	Abcf1	ATP-binding cassette, sub-family F (GCN20), member 1	0.000124785	0.0041606
H3120E04	Mm.24718	Rbmxrt	RNA binding motif protein, X chromosome retrogene	0.000125473	0.00417509
H3023D09	Mm.100638	Xylt2	xylosyltransferase II	0.000125528	0.00416849
H3120G12	Mm.173926	4933409N07Rik	RIKEN cDNA 4933409N07 gene	0.000125646	0.00416401
H3021D08	Mm.4449	D2Wsu81e	DNA segment, Chr 2, Wayne State University 81, expressed	0.00012567	0.00415645
H3008E02	Mm.287892	Clpp	caseinolytic protease, ATP-dependent, proteolytic subunit homolog (E. coli)	0.000125682	0.00414851
H3022C02	Mm.235813	AI256711	expressed sequence AI256711	0.000125837	0.00414533
H3016F10	Mm.28297	Cdk5rap3	CDK5 regulatory subunit associated protein 3	0.000126041	0.00414377
H3118G12	Mm.23739	0610041O14Rik	RIKEN cDNA 0610041O14 gene	0.000126222	0.00414144
P421	Mm.258986	Mark2	MAP/microtubule affinity-regulating kinase 2	0.000126895	0.00415525
H3099H01			EST	0.000127289	0.00415987
H3119A11	Mm.229364		Mus musculus transcribed sequence with weak similarity to protein ref:NP_081764.1 (M.musculus) RIKEN cDNA 5730493B19 [Mus musculus]	0.000127457	0.00415712
H3086E09	Mm.44239	Bag5	BCL2-associated athanogene 5	0.000127686	0.00415634
P674	Mm.33263	H2-D1	histocompatibility 2, D region locus 1	0.00012798	0.00415771
H3053H08	Mm.316823		Mus musculus transcribed sequences	0.00012874	0.00417418
H3001E09			EST	0.000129751	0.00419869
H3124D05	Mm.2261	Psmd4	proteasome (prosome, macropain) 26S subunit, non-ATPase, 4	0.000130106	0.00420192
H3023D10	Mm.28597	D15Ertd747e	DNA segment, Chr 15, ERATO Doi 747, expressed	0.000130266	0.00419885
H3139C04			EST	0.000130367	0.00419389
H3126C07			EST	0.000130496	0.00418986
H3021H06	Mm.260885		Mus musculus adult male stomach cDNA, RIKEN full-length enriched library, clone:2210411K19 product:ribosomal protein L41, full insert sequence	0.000130635	0.00418618
H3104B12	Mm.280768	L3mbtl2	l(3)mbt-like 2 (Drosophila)	0.000132087	0.00422449
H3009D02	Mm.278560	0610008F14Rik	RIKEN cDNA 0610008F14 gene	0.000132099	0.00421668
T060	Mm.18630	Acadvl	acyl-Coenzyme A dehydrogenase, very long chain	0.000132274	0.00421408
H3113B12			EST	0.000132897	0.00422575
H3048F09	Mm.273915	Grcc3f	gene rich cluster, C3f gene	0.000133297	0.00423031
H3106H10	Mm.276502	1190005P08Rik	RIKEN cDNA 1190005P08 gene	0.000134301	0.00425399
H3100H01	Mm.3716		Mus musculus transcribed sequence with strong similarity to protein ref:NP_006328.1 (H.sapiens) microspherule protein 1; cell cycle-regulated factor (78 kDa) [Homo sapiens]	0.000135023	0.00426865
H3006A04	Mm.2948	H2-Ke2	H2-K region expressed gene 2	0.000135177	0.00426533
H3007G04	Mm.243234	Psmd2	proteasome (prosome, macropain) 26S subunit, non-ATPase, 2	0.000135438	0.00426538
H3094D03	Mm.167913	2810403L02Rik	RIKEN cDNA 2810403L02 gene	0.000137217	0.00431317
H3119E11			EST	0.000137343	0.0043089
H3140F12			EST	0.000138995	0.00435246
P096	Mm.289841	2810430M08Rik	RIKEN cDNA 2810430M08 gene	0.000139788	0.00436897
H3016C09	Mm.258589	Map3k7	mitogen activated protein kinase kinase kinase 7	0.000140977	0.00439779
H3156F10	Mm.6743	Nfe2l1	nuclear factor, erythroid derived 2,-like 1	0.0001412	0.0043964
H3129D12	Mm.247762	2610301D06Rik	RIKEN cDNA 2610301D06 gene	0.000141924	0.00441063
H3088C11	Mm.156452	4432404J10Rik	RIKEN cDNA 4432404J10 gene	0.000143165	0.00444082
H3011D06	Mm.3863	Por	P450 (cytochrome) oxidoreductase	0.000143645	0.00444734
H3156E07			EST	0.000143781	0.00444317
H3125H06	Mm.280083	2010004J23Rik	RIKEN cDNA 2010004J23 gene	0.000144646	0.00446154
T049	Mm.296082	Slc25a11	solute carrier family 25 (mitochondrial carrier; oxoglutarate carrier), member 11	0.000144886	0.00446059
H3143A11	Mm.132208	Ipo11	importin 11	0.000145321	0.00446564
H3154H12	Mm.126534	Paip2	polyadenylate-binding protein-interacting protein 2	0.000145663	0.00446783
H3026E07	Mm.134191	Sfxn1	sideroflexin 1	0.00014599	0.00446951
H3112D08	Mm.260539	Psmd11	proteasome (prosome, macropain) 26S subunit, non-ATPase, 11	0.000146313	0.00447109
H3115D01	Mm.4071	Lamr1	laminin receptor 1 (ribosomal protein SA)	0.000146831	0.00447862
H3153F04	Mm.29802	BC005632	cDNA sequence BC005632	0.000146966	0.00447445
H3016D10			EST	0.000147236	0.0044744
H3080D01	Mm.331	Ubc	ubiquitin C	0.000147828	0.00448413
H3141H01	Mm.163885	AA415817	expressed sequence AA415817	0.000148473	0.00449541
H3122D09	Mm.69	Nudc	nuclear distribution gene C homolog (Aspergillus)	0.000148509	0.00448825
H3107C11	Mm.276367	Efemp2	epidermal growth factor-containing fibulin-like extracellular matrix protein 2	0.000148882	0.00449126
H3008F09	Mm.3991	Slc25a10	solute carrier family 25 (mitochondrial carrier; dicarboxylate transporter), member 10	0.000149092	0.00448937
H3113D05	Mm.296756	Rpl12	ribosomal protein L12	0.000149674	0.00449868
H3010C06	Mm.28688	Sars1	seryl-aminoacyl-tRNA synthetase 1	0.000151375	0.00454152
H3019A06	Mm.154979	Plac1	placental specific protein 1	0.000151827	0.0045468
H3126B04	Mm.275810	2210402A09Rik	RIKEN cDNA 2210402A09 gene	0.000152411	0.00455601
H3132C12	Mm.301018		Mus musculus similar to GDP-mannose 4, 6-dehydratase (LOC384867), mRNA	0.000152584	0.00455293
H3007C01	Mm.41890	2010315L10Rik	RIKEN cDNA 2010315L10 gene	0.000154053	0.00458845
H3016C01	Mm.20277	2310076N22Rik	RIKEN cDNA 2310076N22 gene	0.000154264	0.00458644
H3023H11	Mm.30357	Ftl1	ferritin light chain 1	0.000155388	0.00461151
H3031G02	Mm.253614	Ppil2	peptidylprolyl isomerase (cyclophilin)-like 2	0.000155616	0.00460998
H3124F09	Mm.3158	Rplp1	ribosomal protein, large, P1	0.000155821	0.00460776
H3022B01			EST	0.000156052	0.00460634
H3004E07			EST	0.000156261	0.00460426
H3114C11	Mm.241152	2400004H09Rik	RIKEN cDNA 2400004H09 gene	0.000156555	0.00460468
H3024C08	Mm.7401	Hs1bp1	HS1 binding protein	0.000158364	0.00464958
T358			EST	0.00015885	0.00465555
H3108D12	Mm.280075	Dp1	deleted in polyposis 1	0.00016001	0.0046812
H3042H06	Mm.308756		Mus musculus BALB/c 3T3mou non-muscle alpha-actinin (FR-17) mRNA, partial cds.	0.000160339	0.00468252
H3061F09	Mm.52526	2810439F02Rik	RIKEN cDNA 2810439F02 gene	0.000160773	0.00468689
H3099G01			EST	0.000160884	0.00468184
H3024D02	Mm.227260	4930542G03Rik	RIKEN cDNA 4930542G03 gene	0.000162537	0.0047216
H3036E04			EST	0.00016329	0.00473513
H3014D12	Mm.40802	2810480G15Rik	Riken cDNA 2810480G15 gene	0.000163813	0.00474195
H3008E08	Mm.289915	Ddb1	damage specific DNA binding protein 1	0.000164291	0.00474742
H3016B04	Mm.29473	Copz1	coatomer protein complex, subunit zeta 1	0.000165263	0.00476716
H3156D08	Mm.182867	2810002O09Rik	RIKEN cDNA 2810002O09 gene	0.000165295	0.00475974
P044	Mm.28659	Pes1	pescadillo homolog 1, containing BRCT domain (zebrafish)	0.000165862	0.00476774
H3024A05	Mm.291442	Sparc	secreted acidic cysteine rich glycoprotein	0.000166487	0.00477738
H3050D01	Mm.172143	4933427D06	hypothetical protein 4933427D06	0.000167887	0.00480915
H3154H04	Mm.19133	Aplp2	amyloid beta (A4) precursor-like protein 2	0.000168739	0.00482519
H3005E06			EST	0.000170474	0.00486635
H3129B09	Mm.274232	Smarcal1	Swi/SNF related matrix associated, actin dependent regulator of chromatin, subfamily a-like 1	0.00017065	0.00486294
H3099B08	Mm.28646	6430596G11Rik	RIKEN cDNA 6430596G11 gene	0.000171864	0.00488908
H3132C02	Mm.29490	Ctdsp2	CTD (carboxy-terminal domain, RNA polymerase II, polypeptide A) small phosphatase 2	0.000172491	0.00489844
H3109G08			EST	0.00017419	0.00493817
H3064A10			EST	0.000175294	0.00496095
H3112D04	Mm.279837		Mus musculus transcribed sequence with strong similarity to protein sp:P13662 (H.sapiens) NTF2_HUMAN Nuclear transport factor 2 (NTF-2) (Placental protein 15) (PP15)	0.000175518	0.00495877
H3020A03	Mm.8040	Prkch	protein kinase C, eta	0.000175759	0.00495707
H3001F01	Mm.15675	Efna1	ephrin A1	0.000176194	0.00496085
H3074F11	Mm.247080	Lsm7	LSM7 homolog, U6 small nuclear RNA associated (S. cerevisiae)	0.000176248	0.00495389
H3125E06	Mm.290786	Rpl41	ribosomal protein L41	0.000178052	0.00499606
H3020A07	Mm.22626	Ahsa1	AHA1, activator of heat shock 90kDa protein ATPase homolog 1 (yeast)	0.000178469	0.00499926
H3121E03	Mm.35296		Mus musculus adult male eyeball cDNA, RIKEN full-length enriched library, clone:7530422H18 product:unclassifiable, full insert sequence	0.000179045	0.00500689
H3123B08			EST	0.000179956	0.00502383
H3079H04	Mm.136648	2810411G23Rik	RIKEN cDNA 2810411G23 gene	0.000180322	0.00502552
H3115F07	Mm.45106	Pigc	phosphatidylinositol glycan, classC	0.000181828	0.00505893
P857	Mm.58	Itgb7	integrin beta 7	0.000182908	0.0050804
H3106C05	Mm.28050	Cd2bp2	CD2 antigen (cytoplasmic tail) binding protein 2	0.000184219	0.00510819
H3114F11	Mm.249364	Ifngr2	interferon gamma receptor 2	0.000184355	0.00510337
H3052C11	Mm.198817	Clta	clathrin, light polypeptide (Lca)	0.000184832	0.005108
H3080G02	Mm.255116	Minpp1	multiple inositol polyphosphate histidine phosphatase 1	0.000185073	0.00510609
H3005C06	Mm.45312	Anapc5	anaphase-promoting complex subunit 5	0.000185415	0.00510698
H3123E11	Mm.276367	Efemp2	epidermal growth factor-containing fibulin-like extracellular matrix protein 2	0.00018556	0.00510243
H3118H09	Mm.4084	Ndst2	N-deacetylase/N-sulfotransferase (heparan glucosaminyl) 2	0.000186862	0.00512968
P912	Mm.38235	Rp9h	retinitis pigmentosa 9 homolog (human)	0.000188437	0.0051643
H3139G08	Mm.298117	Fau	Finkel-Biskis-Reilly murine sarcoma virus (FBR-MuSV) ubiquitously expressed (fox derived)	0.00018844	0.0051558
H3029F03	Mm.70371	2310005E10Rik	RIKEN cDNA 2310005E10 gene	0.00018864	0.00515271
H3032F02	Mm.236969	Renbp	renin binding protein	0.000188914	0.00515167
H3137H09	Mm.41022	1200009A02Rik	RIKEN cDNA 1200009A02 gene	0.000189733	0.00516545
P443	Mm.182434	Fstl1	follistatin-like 1	0.000189992	0.00516395
H3093G09	Mm.248769	D17Wsu94e	DNA segment, Chr 17, Wayne State University 94, expressed	0.000190109	0.00515863
H3029F09	Mm.29045	Atp6v1e1	ATPase, H+ transporting, V1 subunit E isoform 1	0.000190549	0.00516205
H3003B01	Mm.273418	9430059D04Rik	RIKEN cDNA 9430059D04 gene	0.000190816	0.0051608
H3113H11			EST	0.000191188	0.00516239
H3045E06	Mm.155182		Mus musculus transcribed sequences	0.000191276	0.00515632
H3005F09	Mm.271679	Bat3	HLA-B-associated transcript 3	0.000191307	0.00514873
H3119A03	Mm.196110	Hba-a1	hemoglobin alpha, adult chain 1	0.000192086	0.00516125
H3088B01	Mm.155696	Bet1l	blocked early in transport 1 homolog (S. cerevisiae)-like	0.000192433	0.00516215
T212	Mm.9221	Rab4a	RAB4A, member RAS oncogene family	0.000192582	0.00515776
H3018H07	Mm.27358	A030010B05Rik	RIKEN cDNA A030010B05 gene	0.00019305	0.00516189
H3010B06	Mm.11285	Adprhl2	ADP-ribosylhydrolase like 2	0.000193236	0.00515849
H3136B09	Mm.25848	Bckdha	branched chain ketoacid dehydrogenase E1, alpha polypeptide	0.000193327	0.00515257
H3021B01	Mm.40796	Apxl	apical protein, Xenopus laevis-like	0.000195086	0.00519104
H3140F11	Mm.23594		Mus musculus RIKEN cDNA 6430411K14 gene, mRNA (cDNA clone IMAGE:5361628), containing frame-shift errors	0.000195248	0.00518699
T471	Mm.1258	Tnfrsf1a	tumor necrosis factor receptor superfamily, member 1a	0.000196001	0.0051986
T076	Mm.236443	Fasn	fatty acid synthase	0.00019615	0.0051942
H3068G06	Mm.321354		Mus musculus transcribed sequences	0.000196573	0.00519705
H3047D03	Mm.21815	Pramel6	preferentially expressed antigen in melanoma like 6	0.000196729	0.00519284
H3008H08	Mm.218533	1500016H10Rik	RIKEN cDNA 1500016H10 gene	0.000197174	0.00519625
T020	Mm.14825	Idh3g	isocitrate dehydrogenase 3 (NAD+), gamma	0.000197895	0.00520692
H3117H02	Mm.102852		Mus musculus 9.5 days embryo parthenogenote cDNA, RIKEN full-length enriched library, clone:B130016L07 product:unknown EST, full insert sequence	0.000198737	0.00522073
H3053F05			EST	0.000199985	0.00524515
H3008A10	Mm.147946	Mybbp1a	MYB binding protein (P160) 1a	0.000201868	0.00528612
H3052E08	Mm.5002	9130213B05Rik	RIKEN cDNA 9130213B05 gene	0.00020231	0.00528927
H3135D12	Mm.38450	set-09	septin 9	0.000202456	0.00528471
H3031E07	Mm.251638	0610023A07Rik	RIKEN cDNA 0610023A07 gene	0.000202516	0.00527792
H3010B02			EST	0.000202564	0.00527083
H3048F02	Mm.23065	Tnrc15	trinucleotide repeat containing 15	0.000202906	0.0052714
H3031D03	Mm.275831	Aldo1	aldolase 1, A isoform	0.000205247	0.0053238
H3044B07	Mm.3981	Cops6	COP9 (constitutive photomorphogenic) homolog, subunit 6 (Arabidopsis thaliana)	0.000206896	0.00535814
H3127E04	Mm.279861	1810060D16Rik	RIKEN cDNA 1810060D16 gene	0.000208209	0.0053837
H3125B04	Mm.589	Gpi1	glucose phosphate isomerase 1	0.000208466	0.00538188
H3081D12			EST	0.000210167	0.0054173
H3155H05	Mm.235137	Scye1	small inducible cytokine subfamily E, member 1	0.000210515	0.00541781
H3108H07	Mm.205601	Cttn	cortactin	0.000210533	0.00540982
H3155H04	Mm.234801	AI314180	expressed sequence AI314180	0.000210711	0.00540595
H3006C05	Mm.296770		Mus musculus 13 days embryo lung cDNA, RIKEN full-length enriched library, clone:D430028F08 product:unknown EST, full insert sequence	0.000211566	0.00541944
H3120H07			EST	0.000213057	0.00544916
H3049B03			EST	0.000214742	0.00548375
H3076E11	Mm.32646	1110060O18Rik	RIKEN cDNA 1110060O18 gene	0.000215808	0.00550245
H3019A02			EST	0.000216177	0.00550332
H3117H07	Mm.274335	Ampd2	adenosine monophosphate deaminase 2 (isoform L)	0.000216942	0.00551428
H3025F11	Mm.5289	Gapd	glyceraldehyde-3-phosphate dehydrogenase	0.000217048	0.00550846
H3159F02	Mm.2545	Aqr	aquarius	0.000217158	0.00550279
H3120F10			EST	0.000218229	0.00552143
H3132C01	Mm.275393	Ppp2r4	protein phosphatase 2A, regulatory subunit B (PR 53)	0.000218432	0.0055181
H3137A06	Mm.6510	Zp2	zona pellucida glycoprotein 2	0.000218941	0.00552249
H3075D04	Mm.29133	Bub1b	budding uninhibited by benzimidazoles 1 homolog, beta (S. cerevisiae)	0.000219027	0.0055162
H3010D06	Mm.287892	Clpp	caseinolytic protease, ATP-dependent, proteolytic subunit homolog (E. coli)	0.000219123	0.0055102
H3026G03	Mm.251013	Kpnb1	karyopherin (importin) beta 1	0.000219954	0.00552265
H3024G04			EST	0.000220031	0.00551617
H3008A04	Mm.154625		Mus musculus transcribed sequence with weak similarity to protein pir:S26650 (H.sapiens) S26650 DNA-binding protein 5 - human	0.000220223	0.00551259
H3052F04	Mm.276271	Glg1	golgi apparatus protein 1	0.000220282	0.00550572
H3131C07	Mm.28792	Ube3b	ubiquitin protein ligase E3B	0.000220943	0.00551386
H3147H11	Mm.22596	Tsta3	tissue specific transplantation antigen P35B	0.000221783	0.00552646
H3143F12	Mm.2065	Ctps2	cytidine 5'-triphosphate synthase 2	0.000221961	0.00552255
H3102H01			EST	0.000222632	0.00553088
H3088D11	Mm.202152	9430093H08Rik	RIKEN cDNA 9430093H08 gene	0.000223288	0.00553882
H3091E10	Mm.18742	Nupr1	nuclear protein 1	0.000223608	0.00553842
H3007H01	Mm.7472	Dscr3	Down syndrome critical region gene 3	0.000223751	0.00553364
H3048D08			EST	0.000224761	0.00555029
H3079D06	Mm.89579	Mpdu1	mannose-P-dolichol utilization defect 1	0.000224914	0.00554576
H3105G04	Mm.19073	Map4k4	mitogen-activated protein kinase kinase kinase kinase 4	0.000225171	0.00554379
H3011H02			EST	0.000226044	0.00555697
H3106E03	Mm.233799	Igfbp4	insulin-like growth factor binding protein 4	0.000226314	0.00555531
H3039A09	Mm.172679	Spata5	spermatogenesis associated 5	0.000227933	0.00558673
H3094B09	Mm.185518	BC014795	cDNA sequence BC014795	0.000228804	0.00559976
H3027E09	Mm.70666	Eno1	enolase 1, alpha non-neuron	0.000231533	0.00565812
H3023H09	Mm.30357	Ftl1	ferritin light chain 1	0.000232631	0.00567653
P286	Mm.195663	Cdkn1a	cyclin-dependent kinase inhibitor 1A (P21)	0.00023368	0.00569372
H3127F12	Mm.3350	Macf1	microtubule-actin crosslinking factor 1	0.000234591	0.00570746
H3139D09			EST	0.000234595	0.00569914
H3091H05	Mm.6793	Hras1	Harvey rat sarcoma virus oncogene 1	0.000235067	0.00570219
H3033A03	Mm.45165	Stub1	STIP1 homology and U-Box containing protein 1	0.000236305	0.00572379
H3056A07	Mm.248934	Nubp1	nucleotide binding protein 1	0.000237306	0.00573959
H3080H01	Mm.298563	Uqcrc1	ubiquinol-cytochrome c reductase core protein 1	0.000237477	0.0057353
H3146H10			EST	0.000239914	0.0057857
H3127F02	Mm.1845	Pcx	pyruvate carboxylase	0.000240402	0.00578897
H3092F11	Mm.7472	Dscr3	Down syndrome critical region gene 3	0.000240505	0.00578301
H3127E11	Mm.132973	Ctnnbl1	catenin, beta like 1	0.000240733	0.00578004
H3042E12			EST	0.00024137	0.0057869
H3019G05	Mm.301264	Pmm2	phosphomannomutase 2	0.00024247	0.00580482
H3114C10	Mm.7046	Ppgb	protective protein for beta-galactosidase	0.000243538	0.00582193
H3107F10			EST	0.000244864	0.00584516
H3011A04	Mm.9684	Vasp	vasodilator-stimulated phosphoprotein	0.000246166	0.00586773
H3055H08	Mm.292492	Polr2c	polymerase (RNA) II (DNA directed) polypeptide C	0.000246364	0.00586397
H3136A07	Mm.277792	Col1a2	procollagen, type I, alpha 2	0.000246941	0.00586922
H3019G03	Mm.28689	Tbrg1	transforming growth factor beta regulated gene 1	0.000247821	0.00588165
H3135A09	Mm.84669	4931408L03Rik	RIKEN cDNA 4931408L03 gene	0.000248898	0.00589871
H3032C11			EST	0.000249825	0.00591217
H3147E08	Mm.28258	1500016L11Rik	RIKEN cDNA 1500016L11 gene	0.000252035	0.00595592
H3031D02	Mm.169673	AI642036	expressed sequence AI642036	0.000252615	0.00596106
H3153C04	Mm.5731	Ddt	D-dopachrome tautomerase	0.000253965	0.00598433
H3135G09	Mm.275436	Map2k2	mitogen activated protein kinase kinase 2	0.000254643	0.00599176
H3014D03	Mm.271922	Brms1	breast cancer metastasis-suppressor 1	0.000256282	0.00602171
H3028D03	Mm.4419	Rpl5	ribosomal protein L5	0.000256662	0.00602206
H3023C08	Mm.197486	Rrm1	ribonucleotide reductase M1	0.000256981	0.00602095
H3041F03	Mm.133292	Actb	actin, beta, cytoplasmic	0.000257432	0.00602296
H3009A01	Mm.292001	2610031L17Rik	RIKEN cDNA 2610031L17 gene	0.000257459	0.00601506
H3013D09	Mm.279256	Ndr3	N-myc downstream regulated 3	0.00025825	0.00602499
H3129B07	Mm.327150		Mus musculus transcribed sequences	0.000258264	0.00601679
H3081H07	Mm.28354	2010305A19Rik	RIKEN cDNA 2010305A19 gene	0.000258636	0.00601694
H3028E07	Mm.84294	3110082I17Rik	RIKEN cDNA 3110082I17 gene	0.000260292	0.00604693
H3109H04	Mm.150	Fcgr1	Fc receptor, IgG, high affinity I	0.000262244	0.00608369
H3004F09	Mm.219793	Ssrp1	structure specific recognition protein 1	0.000262293	0.00607628
H3069C05	Mm.24765	Rnf20	ring finger protein 20	0.000263739	0.00610118
H3117F01	Mm.279194	Rbm10	RNA binding motif protein 10	0.000266541	0.00615737
H3010B11	Mm.295031	Ddx27	DEAD (Asp-Glu-Ala-Asp) box polypeptide 27	0.000267031	0.00616004
H3004E05	Mm.260904	Rps8	ribosomal protein S8	0.000268626	0.00618816
H3148D04	Mm.27578	Maged1	melanoma antigen, family D, 1	0.000268693	0.00618107
H3132F08	Mm.288709	B130036O03	hypothetical protein B130036O03	0.000270143	0.00620574
H3007G08	Mm.10528	Hars	histidyl-tRNA synthetase	0.000270558	0.00620663
P385	Mm.1360	Gadd45b	growth arrest and DNA-damage-inducible 45 beta	0.000271251	0.00621387
H3032D04	Mm.272015	Mcrs1	microspherule protein 1	0.000271996	0.00622228
H3114H03	Mm.247762	2610301D06Rik	RIKEN cDNA 2610301D06 gene	0.000272435	0.00622369
H3085G03	Mm.271671	Cyba	cytochrome b-245, alpha polypeptide	0.000272595	0.00621872
H3014E02	Mm.290536	3110040D16Rik	RIKEN cDNA 3110040D16 gene	0.000273602	0.00623306
H3076H10	Mm.51136	Csnk2a2	casein kinase II, alpha 2, polypeptide	0.000274796	0.0062516
H3145G08	Mm.154387	Tkt	transketolase	0.000275148	0.00625098
H3125B10	Mm.21444	1110003H09Rik	RIKEN cDNA 1110003H09 gene	0.000277124	0.00628721
H3001E10	Mm.78861	Nolc1	nucleolar and coiled-body phosphoprotein 1	0.000278001	0.00629841
H3115A10			EST	0.000278891	0.0063099
H3004D11	Mm.57250	Hic1	hypermethylated in cancer 1	0.000279183	0.00630784
N740	Mm.298110	Eef1a1	eukaryotic translation elongation factor 1 alpha 1	0.000279522	0.00630686
H3087A01	Mm.27955	Wbscr1	Williams-Beuren syndrome chromosome region 1 homolog (human)	0.000280328	0.00631639
H3124E09	Mm.33622	2310040C09Rik	RIKEN cDNA 2310040C09 gene	0.000280353	0.00630831
H3119F02	Mm.133919	Tcfl1	transcription factor-like 1	0.000281274	0.00632042
H3110F10	Mm.9075	Ephx1	epoxide hydrolase 1, microsomal	0.000282493	0.00633917
H3125E05			EST	0.000282645	0.00633393
H3126B12	Mm.10091	Pkig	protein kinase inhibitor, gamma	0.000283752	0.00635011
H3061E04	Mm.241056	Cdo1	cysteine dioxygenase 1, cytosolic	0.000284001	0.00634705
H3007A03	Mm.89940	Adam19	a disintegrin and metalloproteinase domain 19 (meltrin beta)	0.000285137	0.00636381
H3004C01	Mm.148007	1110012J22Rik	RIKEN cDNA 1110012J22 gene	0.000285615	0.00636586
H3004B06	Mm.1508	Bzrp	benzodiazepine receptor, peripheral	0.000285846	0.00636239
H3022D03			EST	0.000286132	0.00636016
P305	Mm.193096	Scd2	stearoyl-Coenzyme A desaturase 2	0.000287167	0.00637457
H3144D10	Mm.4352	Col18a1	procollagen, type XVIII, alpha 1	0.000287772	0.00637939
H3096F04	Mm.27227	5730469M10Rik	RIKEN cDNA 5730469M10 gene	0.000288164	0.0063795
H3141G04	Mm.9244	Suv39h1	suppressor of variegation 3-9 homolog 1 (Drosophila)	0.000288198	0.0063717
H3079B09	Mm.137966	2410195B05Rik	RIKEN cDNA 2410195B05 gene	0.000289372	0.00638908
H3032A07			EST	0.000290565	0.00640682
H3136D08	Mm.23951	1810012N01Rik	RIKEN cDNA 1810012N01 gene	0.000290653	0.00640019
H3035C06	Mm.288634		Mus musculus 4 days neonate male adipose cDNA, RIKEN full-length enriched library, clone:B430101C18 product:HYPOTHETICAL 19.9 KDA PROTEIN homolog [Homo sapiens], full insert sequence	0.000291064	0.00640069
P762	Mm.3815	Sdc4	syndecan 4	0.000291494	0.0064016
H3159B04			EST	0.000291772	0.00639918
H3088A04	Mm.173256		Mus musculus adult female vagina cDNA, RIKEN full-length enriched library, clone:9930023J12 product:unknown EST, full insert sequence	0.000291793	0.00639113
H3097A03	Mm.2136	Cox4i1	cytochrome c oxidase subunit IV isoform 1	0.000292358	0.006395
H3134B07	Mm.157105	Psmc1	protease (prosome, macropain) 26S subunit, ATPase 1	0.000292849	0.00639723
H3039A12			EST	0.000293133	0.00639496
H3066G06	Mm.28979	BC022641	cDNA sequence BC022641	0.000293211	0.0063882
H3022A11	Mm.212567	Cald1	caldesmon 1	0.000294216	0.00640163
H3085H02	Mm.71015	2700053F16Rik	RIKEN cDNA 2700053F16 gene	0.000294531	0.00640002
H3046B07	Mm.266884	9130229H14Rik	RIKEN cDNA 9130229H14 gene	0.000294981	0.00640137
T388	Mm.155696	Bet1l	blocked early in transport 1 homolog (S. cerevisiae)-like	0.000295146	0.00639652
H3023C05	Mm.292040	Nrbp	nuclear receptor binding protein	0.000296948	0.0064271
H3007A02	Mm.29484	Mrps18b	mitochondrial ribosomal protein S18B	0.000298335	0.00644866
H3007A09	Mm.311604		Mus musculus transcribed sequence with moderate similarity to protein pir:I59377 (H.sapiens) I59377 template activating factor-I, splice form alpha - human	0.000298526	0.00644433
H3016B03	Mm.13886	Sui1-rs1	suppressor of initiator codon mutations, related sequence 1 (S. cerevisiae)	0.000298753	0.00644079
H3135D04	Mm.249520	Mrpl45	mitochondrial ribosomal protein L45	0.000298831	0.00643404
H3006F08	Mm.188851	Pdap1	PDGFA associated protein 1	0.000299146	0.00643242
H3093G01	Mm.299558	G630055P03Rik	RIKEN cDNA G630055P03 gene	0.000303053	0.00650793
H3018D09	Mm.133292	Actb	actin, beta, cytoplasmic	0.000304385	0.00652803
H3009C03	Mm.41964	Tgm1	transglutaminase 1, K polypeptide	0.000304564	0.00652337
H3150B07			EST	0.000305114	0.00652668
H3016G04	Mm.239997	D9Wsu10e	DNA segment, Chr 9, Wayne State University 10, expressed	0.000305398	0.00652427
H3146B07	Mm.103634	Rps19	ribosomal protein S19	0.000305616	0.00652048
H3147G05	Mm.290772	Rpl7	ribosomal protein L7	0.000307375	0.00654951
H3088A10			EST	0.000307527	0.00654429
H3096E12	Mm.165042	Ctdsp1	CTD (carboxy-terminal domain, RNA polymerase II, polypeptide A) small phosphatase 1	0.00030754	0.00653611
H3012C06	Mm.282242	Scarb1	scavenger receptor class B, member 1	0.000310831	0.00659754
H3146E12	Mm.276328	2610510E10Rik	RIKEN cDNA 2610510E10 gene	0.000310839	0.00658923
H3093E05	Mm.235182	Camk2g	calcium/calmodulin -dependent protein kinase II gamma	0.000311973	0.00660477
H3093G02	Mm.35738	Catns	catenin src	0.000312938	0.00661669
H3132C05	Mm.18517	Rasa3	RAS p21 protein activator 3	0.000314018	0.00663101
H3049F10	Mm.289737	Raf1	v-raf-1 leukemia viral oncogene 1	0.000314043	0.00662305
H3124G01			EST	0.000314311	0.00662022
H3072B10	Mm.18503	Ninj1	ninjurin 1	0.000314669	0.00661931
H3098H06	Mm.285771	Taf10	TAF10 RNA polymerase II, TATA box binding protein (TBP)-associated factor	0.000317654	0.00667357
H3134F04	Mm.249986	2410016F01Rik	RIKEN cDNA 2410016F01 gene	0.000317795	0.00666804
H3018G06	Mm.234502	Myo1c	myosin IC	0.000317887	0.00666148
H3021E05	Mm.306328		Mus musculus transcribed sequence	0.000318223	0.00666004
P936	Mm.126043	Bat1a	HLA-B-associated transcript 1A	0.000318497	0.00665731
H3035B08	Mm.80484	B230215L03Rik	RIKEN cDNA B230215L03 gene	0.00031915	0.00666251
H3139H08	Mm.200920	Rps28	ribosomal protein S28	0.000319437	0.00666007
H3021E06	Mm.2581	Epha2	Eph receptor A2	0.000319454	0.006652
H3057F01	Mm.30199	Csnk1e	casein kinase 1, epsilon	0.000323235	0.00672222
H3113C12			EST	0.000325165	0.00675383
H3155E04	Mm.29842	Ndufv1	NADH dehydrogenase (ubiquinone) flavoprotein 1	0.000325531	0.00675293
H3031A08	Mm.18579	Polr2e	polymerase (RNA) II (DNA directed) polypeptide E	0.000327066	0.00677623
H3125D05	Mm.451	Akr1b3	aldo-keto reductase family 1, member B3 (aldose reductase)	0.000327176	0.00677
H3087B08	Mm.315503		Mus musculus transcribed sequences	0.000328118	0.00678096
H3014A12	Mm.18626	Capg	capping protein (actin filament), gelsolin-like	0.00032928	0.00679645
H3132G11	Mm.28297	Cdk5rap3	CDK5 regulatory subunit associated protein 3	0.000329871	0.00680012
H3038D05	Mm.24972	Mvp	major vault protein	0.000330307	0.0068006
H3017D11	Mm.267514	Plxnb2	plexin B2	0.000334401	0.0068763
H3009C07	Mm.296383	Hspca	heat shock protein 1, alpha	0.000337212	0.00692546
H3024C01	Mm.258530	Uble1a	ubiquitin-like 1 (sentrin) activating enzyme E1A	0.000337817	0.00692925
H3076G11	Mm.297937	Asl	argininosuccinate lyase	0.000339036	0.00694561
H3105A07	Mm.205520	A430096B05Rik	RIKEN cDNA A430096B05 gene	0.000339279	0.00694195
H3123D01	Mm.275150	RFWD1	ring finger and WD repeat domain 1	0.000339342	0.00693462
H3009H12	Mm.248640	1200009I06Rik	RIKEN cDNA 1200009I06 gene	0.000339663	0.00693258
H3016C11	Mm.241489	5830416A07Rik	RIKEN cDNA 5830416A07 gene	0.00034027	0.00693637
T220	Mm.39292	Dnm2	dynamin 2	0.000341573	0.00695433
H3157F11			EST	0.000342057	0.00695559
H3015E01	Mm.253902	C030004C14Rik	RIKEN cDNA C030004C14 gene	0.000342248	0.00695089
H3002C12	Mm.3065	Xrn2	5'-3' exoribonuclease 2	0.00034252	0.00694784
H3135F07	Mm.271754	2610024N01Rik	RIKEN cDNA 2610024N01 gene	0.000344119	0.0069717
H3148E05	Mm.104368	Rpl32	ribosomal protein L32	0.000344428	0.00696938
H3158F02	Mm.158264	Pfdn5	prefoldin 5	0.000344487	0.00696201
H3021G06	Mm.260885		Mus musculus adult male stomach cDNA, RIKEN full-length enriched library, clone:2210411K19 product:ribosomal protein L41, full insert sequence	0.000344718	0.00695815
H3040D02	Mm.140619	Egln1	EGL nine homolog 1 (C. elegans)	0.000346584	0.00698726
H3123H07	Mm.21162	2700054G14Rik	RIKEN cDNA 2700054G14 gene	0.000347376	0.00699466
H3113G04	Mm.102812		Mus musculus transcribed sequence	0.000347672	0.00699208
H3031F01	Mm.298563	Uqcrc1	ubiquinol-cytochrome c reductase core protein 1	0.000348723	0.00700466
H3133E12	Mm.30062	Dnttip1	deoxynucleotidyltransferase, terminal, interacting protein 1	0.000348725	0.00699616
H3027E05	Mm.4610	Upp1	uridine phosphorylase 1	0.000349449	0.00700216
H3041B02	Mm.218317	4930553M18Rik	RIKEN cDNA 4930553M18 gene	0.000349901	0.00700269
H3153G03	Mm.233139	2700067D09Rik	RIKEN cDNA 2700067D09 gene	0.000350352	0.00700321
H3053E12	Mm.2706	Atf3	activating transcription factor 3	0.000355745	0.0071024
H3112F08	Mm.290771	Rpl3	ribosomal protein L3	0.000356222	0.0071033
H3017G09	Mm.9257	D10Wsu52e	DNA segment, Chr 10, Wayne State University 52, expressed	0.000356627	0.00710278
H3007D05	Mm.5434	LOC228812	cell division cycle 91-like 1	0.000358844	0.00713831
H3015G02	Mm.139926	Rbm6	RNA binding motif protein 6	0.000359739	0.00714747
H3015C10	Mm.11829	E330036L07Rik	RIKEN cDNA E330036L07 gene	0.000360421	0.00715241
H3032H08	Mm.188105	2300006M17Rik	RIKEN cDNA 2300006M17 gene	0.000361712	0.00716937
P884	Mm.20350	Mad3	Max dimerization protein 3	0.000363589	0.00719793
H3079G07	Mm.12758	Fkbp4	FK506 binding protein 4	0.000364453	0.00720638
H3127H01			EST	0.000365687	0.0072221
H3112F03	Mm.29648	Degs	degenerative spermatocyte homolog (Drosophila)	0.00036586	0.00721685
H3004B09	Mm.193040	Mrps7	mitchondrial ribosomal protein S7	0.000367014	0.00723097
H3008E12	Mm.298083	Arbp	acidic ribosomal phosphoprotein P0	0.000367315	0.00722826
H3152A09	Mm.10954	BC032200	cDNA sequence BC032200	0.0003675	0.00722327
H3027F10	Mm.271699	Skd3	suppressor of K+ transport defect 3	0.00036753	0.00721524
H3030C08	Mm.241109	Rsn	restin (Reed-Steinberg cell-expressed intermediate filament-associated protein)	0.000368347	0.00722268
H3043A02	Mm.207619	Iqgap1	IQ motif containing GTPase activating protein 1	0.0003691	0.00722882
H3136B05	Mm.27961	Lepre1	leprecan 1	0.000369567	0.00722937
H3158G06	Mm.24477	D14Wsu89e	DNA segment, Chr 14, Wayne State University 89, expressed	0.000370851	0.0072459
P640	Mm.3374	Efnb1	ephrin B1	0.00037095	0.00723924
H3129A07			EST	0.000371433	0.00724009
H3082H08	Mm.172169		Mus musculus transcribed sequence with weak similarity to protein ref:NP_081764.1 (M.musculus) RIKEN cDNA 5730493B19 [Mus musculus]	0.000371902	0.00724066
H3124G05			EST	0.000372015	0.00723432
H3025A05	Mm.206404	Eif3s6ip	eukaryotic translation initiation factor 3, subunit 6 interacting protein	0.000374884	0.0072815
H3008B12	Mm.249558	Flnb	filamin, beta	0.000376346	0.00730129
H3086E12	Mm.281189	9830109N13Rik	RIKEN cDNA 9830109N13 gene	0.000377322	0.0073116
H3079E12			EST	0.000378258	0.00732114
H3025F10	Mm.246965	Sdhb	succinate dehydrogenase complex, subunit B, iron sulfur (Ip)	0.000378998	0.00732685
H3094E12	Mm.273318	1190002A17Rik	RIKEN cDNA 1190002A17 gene	0.000379961	0.00733686
H3018A02	Mm.276595		Mus musculus transcribed sequence with moderate similarity to protein ref:NP_003770.1 (H.sapiens) UDP-Gal:betaGlcNAc beta 1,4- galactosyltransferase 3; beta-N-acetylglucosaminyl-glycopeptide beta-1,4-galactosyltransferase; glycoprotein 4-beta-galactosyltransferase; UDP-galactose-glycoprotein galactosyltransferase; beta-1,4-GalTase 3; UDP-galactose:beta-N-acetylglucosamine beta-1,4-galactosyltrans…	0.000382005	0.00736768
H3140H04	Mm.3158	Rplp1	ribosomal protein, large, P1	0.000382029	0.00735954
H3130D09			EST	0.000384463	0.00739776
H3018F07	Mm.276859	Coro1b	coronin, actin binding protein 1B	0.000386073	0.00742007
H3145A02	Mm.124805	AI316882	expressed sequence AI316882	0.000386533	0.00742026
H3126G03	Mm.31643	Prkrip1	Prkr interacting protein 1 (IL11 inducible)	0.000387636	0.00743277
H3032D08	Mm.29989	1110018L13Rik	RIKEN cDNA 1110018L13 gene	0.000389924	0.00746795
H3113D02			EST	0.000392035	0.00749965
H3040G07	Mm.20794	Anxa7	annexin A7	0.000393445	0.00751791
H3027H01	Mm.296730	Rpl15	ribosomal protein L15	0.000395258	0.00754379
H3119G07	Mm.46501	2610027O18Rik	RIKEN cDNA 2610027O18 gene	0.000395538	0.0075404
H3004G11	Mm.298306	Rpl29	ribosomal protein L29	0.000395877	0.00753814
H3033B12	Mm.233855	Eif2b5	eukaryotic translation initiation factor 2B, subunit 5 epsilon	0.000395893	0.00752975
H3132G12	Mm.236443	Fasn	fatty acid synthase	0.000396717	0.0075367
H3023G10	Mm.274734	2410003M04Rik	RIKEN cDNA 2410003M04 gene	0.000397261	0.00753835
H3132A02	Mm.252035	Maged2	melanoma antigen, family D, 2	0.000398323	0.0075498
H3130C02	Mm.265744	Dscr1	Down syndrome critical region homolog 1 (human)	0.000399889	0.00757077
H3149H08	Mm.278597	1500035H01Rik	RIKEN cDNA 1500035H01 gene	0.00040006	0.00756531
H3033G03	Mm.12758	Fkbp4	FK506 binding protein 4	0.000401079	0.00757589
H3025E12	Mm.277634	Gltscr2	glioma tumor suppressor candidate region gene 2	0.000401166	0.00756884
H3124F08	Mm.3158	Rplp1	ribosomal protein, large, P1	0.000402731	0.00758968
H3003G08	Mm.27738	1700020M16Rik	RIKEN cDNA 1700020M16 gene	0.000403514	0.00759574
H3028B07	Mm.219676	9130404D14Rik	RIKEN cDNA 9130404D14 gene	0.000403565	0.00758804
H3074G11	Mm.11434	Tcf19	transcription factor 19	0.00040428	0.00759282
H3135F12	Mm.4068	Crebl1	cAMP responsive element binding protein-like 1	0.00040578	0.00761231
H3115C03	Mm.27757	Bmp1	bone morphogenetic protein 1	0.000406012	0.00760799
P237	Mm.9684	Vasp	vasodilator-stimulated phosphoprotein	0.00040664	0.0076111
H3027D11	Mm.22239	Ap1m2	adaptor protein complex AP-1, mu 2 subunit	0.00040769	0.00762209
H3092C03	Mm.292062		Mus musculus similar to stromelysin-1 PDGF-responsive element binding protein (LOC239190), mRNA	0.000408637	0.00763113
H3154A08	Mm.13360		Mus musculus 12 days embryo spinal ganglion cDNA, RIKEN full-length enriched library, clone:D130023C12 product:unknown EST, full insert sequence	0.00040991	0.00764623
H3005E04	Mm.238973	Atp5b	ATP synthase, H+ transporting mitochondrial F1 complex, beta subunit	0.000410804	0.00765425
H3144F08	Mm.182779		Mus musculus transcribed sequences	0.000413135	0.00768898
H3132B08	Mm.172411	D18Wsu98e	DNA segment, Chr 18, Wayne State University 98, expressed	0.000413142	0.00768042
H3102C06	Mm.274553	Slc6a8	solute carrier family 6 (neurotransmitter transporter, creatine), member 8	0.000413391	0.0076764
H3005D02	Mm.6743	Nfe2l1	nuclear factor, erythroid derived 2,-like 1	0.000414808	0.00769404
H3012E10	Mm.298233	Pabpc1	poly A binding protein, cytoplasmic 1	0.000415342	0.00769528
H3013A05	Mm.42767	Rps17	ribosomal protein S17	0.000415703	0.00769331
H3030F03	Mm.235891	Prnpip1	prion protein interacting protein 1	0.000422529	0.00781086
H3123B01	Mm.259177		Mus musculus cDNA clone MGC:73493 IMAGE:6813048, complete cds	0.000423498	0.00782
H3077C01	Mm.274553	Slc6a8	solute carrier family 6 (neurotransmitter transporter, creatine), member 8	0.000427278	0.00788096
H3018D08	Mm.258140	Dnajc7	DnaJ (Hsp40) homolog, subfamily C, member 7	0.000429836	0.00791927
T466	Mm.260227	Pak1	p21 (CDKN1A)-activated kinase 1	0.000431177	0.00793511
H3135A11	Mm.270283	Rps27	ribosomal protein S27	0.000431223	0.00792708
H3108G11	Mm.158229	1500011L16Rik	RIKEN cDNA 1500011L16 gene	0.000431223	0.00791826
H3011G08	Mm.23468		Mus musculus similar to leucine zipper, down-regulated in cancer 1; breast cancer, up-regulated 1 (LOC245441), mRNA	0.000431442	0.00791346
H3131B10			EST	0.000431454	0.00790486
P404	Mm.4146	Pdgfrb	platelet derived growth factor receptor, beta polypeptide	0.000433772	0.00793851
H3036B12	Mm.29609	D19Ertd144e	DNA segment, Chr 19, ERATO Doi 144, expressed	0.000434271	0.00793882
H3007G01	Mm.28186	Dhx8	DEAH (Asp-Glu-Ala-His) box polypeptide 8	0.000434554	0.00793518
H3079A02	Mm.296756	Rpl12	ribosomal protein L12	0.000437461	0.00797942
H3134C04	Mm.103032		Mus musculus transcribed sequences	0.000437471	0.00797078
H3140G06	Mm.999	Mpv17	Mpv17 transgene, kidney disease mutant	0.000438398	0.00797884
H3026D04	Mm.294136	Ccnd2	cyclin D2	0.000440426	0.00800691
P668	Mm.166318	Cktsf1b1	cysteine knot superfamily 1, BMP antagonist 1	0.000443513	0.00805414
T065	Mm.21079	Pccb	propionyl Coenzyme A carboxylase, beta polypeptide	0.00044407	0.00805537
H3007D01	Mm.5068	Sh3d4	SH3 domain protein 4	0.000444264	0.00805003
H3025H08			EST	0.000444409	0.00804381
H3140A05	Mm.294627	Fbxl11	F-box and leucine-rich repeat protein 11	0.000444423	0.00803523
H3035E01	Mm.85068	2310067L16Rik	RIKEN cDNA 2310067L16 gene	0.000445335	0.00804288
H3147E05	Mm.2180	Hspcb	heat shock protein 1, beta	0.000445696	0.0080406
H3041D03	Mm.29357	1300017C10Rik	RIKEN cDNA 1300017C10 gene	0.000447415	0.00806277
H3032C06	Mm.270660	MGC58341	hypothetical protein MGC58341	0.000448321	0.00807027
H3007F04			EST	0.000448379	0.0080625
H3144D08			EST	0.000448874	0.0080626
H3153F08	Mm.24997	Ptdsr	phosphatidylserine receptor	0.000451649	0.00810361
H3146E09	Mm.261600	1810073J13Rik	RIKEN cDNA 1810073J13 gene	0.000452359	0.00810751
H3059G04	Mm.260362	B930006L02Rik	RIKEN cDNA B930006L02 gene	0.00045323	0.0081143
H3100B01	Mm.205169	1110039B18Rik	RIKEN cDNA 1110039B18 gene	0.000456474	0.0081635
H3152F12	Mm.27372	5430439H10Rik	RIKEN cDNA 5430439H10 gene	0.000456492	0.00815496
T031	Mm.27210	G6pdx	glucose-6-phosphate dehydrogenase X-linked	0.000461032	0.00822714
T174	Mm.277916	Ptpn1	protein tyrosine phosphatase, non-receptor type 1	0.000463136	0.00825576
T462	Mm.19073	Map4k4	mitogen-activated protein kinase kinase kinase kinase 4	0.000467574	0.00832585
H3011D03	Mm.236443	Fasn	fatty acid synthase	0.000468171	0.00832748
H3114F02			EST	0.000468962	0.00833255
H3144B11	Mm.273454		Mus musculus transcribed sequence with weak similarity to protein ref:NP_056057.1 (H.sapiens) centaurin delta 2, isoform b; ARF-GAP, RHO-GAP, ankyrin repeat, and pleckstrin homology domains-containing protein 1 [Homo sapiens]	0.000472807	0.00839181
H3131A08	Mm.7091	Ssr2	signal sequence receptor, beta	0.000474456	0.00841201
H3079F09	Mm.260557	6720484B16	hypothetical protein 6720484B16	0.000474852	0.00840999
H3078E05	Mm.171666	D11Ertd686e	DNA segment, Chr 11, ERATO Doi 686, expressed	0.000475009	0.00840374
H3131C12	Mm.292040	Nrbp	nuclear receptor binding protein	0.000475187	0.00839786
H3024G01	Mm.5048	Mcm5	minichromosome maintenance deficient 5, cell division cycle 46 (S. cerevisiae)	0.000477717	0.00843352
H3112B05	Mm.332171		Mus musculus transcribed sequence with strong similarity to protein ref:NP_055131.1 (H.sapiens) calcium-regulated heat-stable protein (24kD) [Homo sapiens]	0.000478762	0.00844291
H3030G08	Mm.276137	Atp5a1	ATP synthase, H+ transporting, mitochondrial F1 complex, alpha subunit, isoform 1	0.000479771	0.00845167
H3157C08	Mm.228619	1810024K12Rik	RIKEN cDNA 1810024K12 gene	0.000479888	0.00844469
H3007F12	Mm.30929	Prdx1	peroxiredoxin 1	0.000480963	0.00845459
H3068G07	Mm.34775	Pdha1	pyruvate dehydrogenase E1 alpha 1	0.000484423	0.00850633
H3046A09	Mm.3894	Fkbp10	FK506 binding protein 10	0.000487482	0.00855093
H3011A09			EST	0.000490051	0.00858684
H3118E05	Mm.182631		Mus musculus transcribed sequences	0.000490574	0.00858687
H3039A03	Mm.247684	Acvr2	activin receptor IIA	0.000491229	0.00858921
H3026G02			EST	0.000491813	0.0085903
H3005H11	Mm.288982	2610103J23Rik	RIKEN cDNA 2610103J23 gene	0.000493105	0.00860374
H3002H12			EST	0.000495889	0.00864317
H3091G11	Mm.27836	Tacc3	transforming, acidic coiled-coil containing protein 3	0.000497807	0.00866742
H3017F02	Mm.21065	5730449L18Rik	RIKEN cDNA 5730449L18 gene	0.000502096	0.00873286
H3153C06	Mm.178818	D8Ertd325e	DNA segment, Chr 8, ERATO Doi 325, expressed	0.000505456	0.00878204
H3152B08	Mm.248046	Dnajd1	DnaJ (Hsp40) homolog, subfamily D, member 1	0.000505911	0.00878067
H3013F11	Mm.28840	Rest	RE1-silencing transcription factor	0.00050863	0.00881857
H3129G12	Mm.29106	Prss15	protease, serine, 15	0.000510458	0.00884096
H3076H03	Mm.101274	2010008E23Rik	RIKEN cDNA 2010008E23 gene	0.000512515	0.00886726
H3014C10	Mm.2180	Hspcb	heat shock protein 1, beta	0.000512672	0.00886068
H3140B08	Mm.262345	Pcolce	procollagen C-proteinase enhancer protein	0.000514817	0.00888842
H3019G11	Mm.28465	Lrp10	low-density lipoprotein receptor-related protein 10	0.000515153	0.00888491
H3020A04	Mm.171469	6820402O20Rik	RIKEN cDNA 6820402O20 gene	0.000518383	0.00893127
H3056C09	Mm.589	Gpi1	glucose phosphate isomerase 1	0.000519337	0.00893835
H3017F04	Mm.28663	Abcb6	ATP-binding cassette, sub-family B (MDR/TAP), member 6	0.000519963	0.00893978
H3098E10	Mm.21743	Mor1	malate dehydrogenase, mitochondrial	0.000522073	0.0089667
H3126C03	Mm.238343	Anxa2	annexin A2	0.000524024	0.00899084
H3005H06	Mm.220328	Ahcyl1	S-adenosylhomocysteine hydrolase-like 1	0.000524198	0.00898446
H3130C05	Mm.227489	Apobec3	apolipoprotein B editing complex 3	0.00052523	0.0089928
H3006D07	Mm.148039	Ggps1	geranylgeranyl diphosphate synthase 1	0.000526449	0.0090043
H3014G04	Mm.27839	D19Ertd721e	DNA segment, Chr 19, ERATO Doi 721, expressed	0.000530152	0.00905823
H3105B04	Mm.42160	Bmp15	bone morphogenetic protein 15	0.000530891	0.00906146
H3138B11	Mm.2044	Serpinf1	serine (or cysteine) proteinase inhibitor, clade F), member 1	0.000531118	0.00905594
H3148G02	Mm.303735		Mus musculus transcribed sequence with strong similarity to protein ref:NP_057017.1 (H.sapiens) hypothetical protein HSPC016 [Homo sapiens]	0.000532254	0.00906593
H3093H04	Mm.34195		Mus musculus transcribed sequences	0.000532319	0.00905767
H3024D05	Mm.29304	Adamts10	a disintegrin-like and metalloprotease (reprolysin type) with thrombospondin type 1 motif, 10	0.00053308	0.00906127
H3090A06	Mm.3863	Por	P450 (cytochrome) oxidoreductase	0.00053368	0.00906211
H3138B06	Mm.292942	1110015K06Rik	RIKEN cDNA 1110015K06 gene	0.0005351	0.00907685
H3072A11	Mm.40491		Mus musculus 10 days neonate cerebellum cDNA, RIKEN full-length enriched library, clone:B930094H20 product:unknown EST, full insert sequence	0.000538	0.00911666
H3018A04	Mm.291048	Rnpep	arginyl aminopeptidase (aminopeptidase B)	0.00053957	0.00913388
H3119A09	Mm.260904	Rps8	ribosomal protein S8	0.000540584	0.00914164
H3040C05	Mm.282743	Ikbkap	inhibitor of kappa light polypeptide enhancer in B-cells, kinase complex-associated protein	0.000542385	0.00916268
H3125H08	Mm.196110	Hba-a1	hemoglobin alpha, adult chain 1	0.000542648	0.00915774
H3027E07	Mm.70666	Eno1	enolase 1, alpha non-neuron	0.000542983	0.00915402
H3110F03	Mm.2852	Dm9	dystrophia myotonica linked gene, N9	0.000543567	0.0091545
H3112A04	Mm.29499	Cpt2	carnitine palmitoyltransferase 2	0.000548254	0.009224
H3015G09	Mm.21976	0610031J06Rik	RIKEN cDNA 0610031J06 gene	0.00054933	0.00923266
H3158D11	Mm.29564	Mmp2	matrix metalloproteinase 2	0.000551146	0.00925375
H3131E08	Mm.257437	Cdh2	cadherin 2	0.000553085	0.00927685
H3052H06	Mm.27363	Ppap2b	phosphatidic acid phosphatase type 2B	0.000555325	0.00930494
H3014E04	Mm.161167		Mus musculus adult male tongue cDNA, RIKEN full-length enriched library, clone:2310073E15 product:hypothetical Galactose-binding domain-like structure containing protein, full insert sequence	0.000555546	0.00929919
H3007H06			EST	0.000556348	0.00930316
H3073E03	Mm.297333		Mus musculus 15 days embryo head cDNA, RIKEN full-length enriched library, clone:D930031I02 product:ubiquitin specific protease 29, full insert sequence	0.000556744	0.00930033
H3085A05	Mm.90024	1700113I22Rik	RIKEN cDNA 1700113I22 gene	0.000558045	0.00931262
H3140C07	Mm.271910	MGC56855	hypothetical protein MGC56855	0.000558318	0.00930775
H3146H03			EST	0.000560083	0.00932773
H3023D01			EST	0.000566134	0.00941899
H3081A10	Mm.17046		Mus musculus transcribed sequence with moderate similarity to protein pir:S12207 (M.musculus) S12207 hypothetical protein (B2 element) - mouse	0.000566264	0.00941163
H3021A05	Mm.260103	D030051D21	hypothetical protein D030051D21	0.000566852	0.00941192
P349	Mm.27239	Vil	villin	0.00056715	0.00940737
P486	Mm.273662	Hspg2	perlecan (heparan sulfate proteoglycan 2)	0.000572027	0.00947873
H3024F09	Mm.2941	Mttp	microsomal triglyceride transfer protein	0.000572909	0.00948381
H3020F08	Mm.4735	Was	Wiskott-Aldrich syndrome homolog (human)	0.000574246	0.0094964
H3029F07	Mm.297551		Mus musculus similar to senescence downregulated leo1-like (LOC235497), mRNA	0.000574537	0.00949168
H3138F11	Mm.277687	Centd2	centaurin, delta 2	0.000574846	0.00948727
H3028G09	Mm.290207	Ets2	E26 avian leukemia oncogene 2, 3' domain	0.000575752	0.0094927
H3102E10	Mm.153997	Hs1bp3	HS1 binding protein 3	0.000575874	0.00948523
P271	Mm.29947	Stk11	serine/threonine kinase 11	0.000576038	0.00947845
T368	Mm.18494	Map2k3	mitogen activated protein kinase kinase 3	0.000577663	0.0094957
H3026C06	Mm.258939	Abr	active BCR-related gene	0.000578183	0.00949477
H3116A07	Mm.292075	Spg7	spastic paraplegia 7 homolog (human)	0.000578249	0.00948639
H3088A07	Mm.272792	Gstm2	glutathione S-transferase, mu 2	0.000578739	0.00948498
H3038B06	Mm.229291	Slc25a1	solute carrier family 25 (mitochondrial carrier; citrate transporter), member 1	0.000581744	0.00952475
H3034B04			EST	0.000582144	0.00952185
H3012G08			EST	0.000583282	0.00953098
H3091D04	Mm.31267	BC037006	cDNA sequence BC037006	0.000583303	0.00952188
H3023D05	Mm.290632	C87436	expressed sequence C87436	0.000583325	0.00951281
H3088G12	Mm.98697		Mus musculus 0 day neonate thymus cDNA, RIKEN full-length enriched library, clone:A430075J01 product:unknown EST, full insert sequence	0.000584029	0.00951487
H3010D12	Mm.275847	Usp19	ubiquitin specific protease 19	0.000585489	0.00952924
H3057D05	Mm.795	Csf1	colony stimulating factor 1 (macrophage)	0.000585837	0.00952549
H3115A03	Mm.28659	Pes1	pescadillo homolog 1, containing BRCT domain (zebrafish)	0.000586434	0.0095258
P655	Mm.6215	Fosl1	fos-like antigen 1	0.000588377	0.00954793
H3149E04	Mm.643	Rps15	ribosomal protein S15	0.000588697	0.00954373
H3028D10	Mm.288212	Rps15a	ribosomal protein S15a	0.00058891	0.00953779
H3075E12	Mm.276381	Tnpo3	transportin 3	0.000589106	0.0095316
H3149G11	Mm.206250	AI504298	expressed sequence AI504298	0.000590107	0.00953843
H3100E01	Mm.275803	4632412I24Rik	RIKEN cDNA 4632412I24 gene	0.000594462	0.00959939
H3029H03	Mm.140365	Eif2b4	eukaryotic translation initiation factor 2B, subunit 4 delta	0.000597068	0.00963204
H3022A06	Mm.275720	D8Ertd812e	DNA segment, Chr 8, ERATO Doi 812, expressed	0.000604382	0.00974048
H3135C09	Mm.273538	Tubb5	tubulin, beta 5	0.000606406	0.00976355
H3152E02			EST	0.000606481	0.00975522
H3090H06	Mm.268910	Tmc6	transmembrane channel-like gene family 6	0.000607602	0.00976372
H3084B03	Mm.105585	Peo1	progressive external ophthalmoplegia 1 (human)	0.000608279	0.00976507
H3011A02	Mm.173271	Atf7ip	activating transcription factor 7 interacting protein	0.000609359	0.00977289
H3092G12	Mm.260516	1810022J16Rik	RIKEN cDNA 1810022J16 gene	0.000611941	0.00980475
H3154A01	Mm.34261	5730410I19Rik	RIKEN cDNA 5730410I19 gene	0.000612337	0.00980156
H3021C02	Mm.289306	Arpc4	actin related protein 2/3 complex, subunit 4	0.00061235	0.00979225
H3031B03			EST	0.000614469	0.00981661
H3007E02	Mm.426	Gstp2	glutathione S-transferase, pi 2	0.000616109	0.00983327
H3092G11	Mm.41572	Lmbr1	limb region 1	0.000617601	0.00984754
H3128H10			EST	0.000618558	0.00985326
H3029D06	Mm.273538	Tubb5	tubulin, beta 5	0.000621452	0.00988979
H3027D05	Mm.788	Ly6e	lymphocyte antigen 6 complex, locus E	0.000624832	0.00993399
H3029E01	Mm.295392	Scamp2	secretory carrier membrane protein 2	0.000625458	0.00993435
H3012A02	Mm.133292	Actb	actin, beta, cytoplasmic	0.000626403	0.00993977
H3114C01	Mm.294589		Mus musculus hypothetical LOC234582 (LOC234582), mRNA	0.000627558	0.00994852
H3081H11	Mm.273152	Psmd8	proteasome (prosome, macropain) 26S subunit, non-ATPase, 8	0.000630452	0.00998478
H3029B11	Mm.4438	Hmga1	high mobility group AT-hook 1	0.00063143	0.00999067
H3004H06	Mm.27545	Hrmt1l2	heterogeneous nuclear ribonucleoproteins methyltransferase-like 2 (S. cerevisiae)	0.000631991	0.00998995
H3022H04	Mm.235074	D8Ertd594e	DNA segment, Chr 8, ERATO Doi 594, expressed	0.000632039	0.00998112
H3137H05	Mm.298117	Fau	Finkel-Biskis-Reilly murine sarcoma virus (FBR-MuSV) ubiquitously expressed (fox derived)	0.000632415	0.0099775
H3103B09	Mm.151819	Cdh22	cadherin 22	0.000632899	0.00997558
H3079C05	Mm.202725	Ddx46	DEAD (Asp-Glu-Ala-Asp) box polypeptide 46	0.000634809	0.00999612

## Sheet: ma24_down_fdr01
List of repressed genes at 24h in hEWS/FLI1V5 expressing MPC's (FDR 1%)
Clone ID	Unigene cluster	Gene symbol	Clone name	t-test p value	FDR
H3117D05	Mm.260855	Meis1	myeloid ecotropic viral integration site 1	1.9949e-08	0.000335363
H3120D05	Mm.67949	1200004E24Rik	RIKEN cDNA 1200004E24 gene	9.3907e-08	0.000789335
H3062H11	Mm.8681	Ptpn11	protein tyrosine phosphatase, non-receptor type 11	1.93835e-07	0.00108619
H3005D05			EST	4.87424e-07	0.00204852
H3008D05	Mm.199964	D10Ertd438e	DNA segment, Chr 10, ERATO Doi 438, expressed	6.27114e-07	0.00210848
H3159D01	Mm.287173	Wee1	wee 1 homolog (S. pombe)	1.10881e-06	0.00310669
H3029F04	Mm.24069	Fem1b	feminization 1 homolog b (C. elegans)	1.25359e-06	0.00301059
H3146F12	Mm.276503	2700023B17Rik	RIKEN cDNA 2700023B17 gene	1.3812e-06	0.00290242
H3004E04	Mm.33764	Ivns1abp	influenza virus NS1A binding protein	1.42904e-06	0.00266929
H3027B09	Mm.4876	Rcn	reticulocalbin	1.7246e-06	0.00289922
H3126D09	Mm.193688	Ptp4a2	protein tyrosine phosphatase 4a2	1.83266e-06	0.0028008
H3017F12	Mm.192580	Rtn4	reticulon 4	1.88649e-06	0.00264281
H3007A01	Mm.259589	D030063F01Rik	RIKEN cDNA D030063F01 gene	1.98159e-06	0.0025625
H3094B10	Mm.280077	Hiat1	hippocampus abundant gene transcript 1	2.15035e-06	0.0025821
H3135H02	Mm.276262	BC055915	cDNA sequence BC055915	2.17356e-06	0.00243598
T463	Mm.256765	Nfkb1	nuclear factor of kappa light chain gene enhancer in B-cells 1, p105	2.38321e-06	0.00250401
H3139A06	Mm.40132	Cldn12	claudin 12	2.40952e-06	0.00238273
H3118H11	Mm.21764	Snrpg	small nuclear ribonucleoprotein polypeptide G	2.47427e-06	0.00231083
H3099D10	Mm.10565		Mus musculus mRNA for mszf55-2, partial cds.	2.50217e-06	0.0022139
H3153H10	Mm.202966	8030499H02Rik	RIKEN cDNA 8030499H02 gene	2.72854e-06	0.00229347
H3091E09	Mm.297348		Mus musculus similar to Eukaryotic translation initiation factor 1A (eIF-1A) (eIF-4C) (LOC236359), mRNA	3.09445e-06	0.00247718
H3026B04	Mm.202337	Ppat	phosphoribosyl pyrophosphate amidotransferase	3.11025e-06	0.00237666
H3155C04	Mm.276155	Ihpk1	inositol hexaphosphate kinase 1	3.19656e-06	0.00233641
H3042F12	Mm.3093	Serpine2	serine (or cysteine) proteinase inhibitor, clade E, member 2	3.39515e-06	0.00237816
H3019F12	Mm.302012		Mus musculus transcribed sequence with strong similarity to protein sp:O75131 (H.sapiens) CNE3_HUMAN Copine III	3.99416e-06	0.00268583
H3020C04	Mm.249589	Xpo4	exportin 4	4.44497e-06	0.00287401
H3069B09	Mm.279195	Idh3a	isocitrate dehydrogenase 3 (NAD+) alpha	4.5307e-06	0.00282095
H3012F05	Mm.52356	1810019C21Rik	RIKEN cDNA 1810019C21 gene	4.6325e-06	0.00278132
H3055H11	Mm.26785	Foxk1	forkhead box K1	4.67955e-06	0.00271269
H3106C07	Mm.103534	Chordc1	cysteine and histidine-rich domain (CHORD)-containing, zinc-binding protein 1	4.7212e-06	0.0026456
H3035E09	Mm.88512	C77032	EST C77032	4.8399e-06	0.00262463
H3102F08	Mm.22547	Asah1	N-acylsphingosine amidohydrolase 1	5.55092e-06	0.00291614
H3082G10	Mm.25548	Kpna3	karyopherin (importin) alpha 3	6.1607e-06	0.00313841
H3130B10	Mm.227583	Atp2a2	ATPase, Ca++ transporting, cardiac muscle, slow twitch 2	6.31057e-06	0.00312021
H3123E01	Mm.229128	1700013H19Rik	RIKEN cDNA 1700013H19 gene	6.31183e-06	0.00303166
H3115B01	Mm.45028		Mus musculus 0 day neonate cerebellum cDNA, RIKEN full-length enriched library, clone:C230060L03 product:unknown EST, full insert sequence	6.67239e-06	0.00311582
H3040H07			EST	7.02857e-06	0.00319344
H3020D10	Mm.279195	Idh3a	isocitrate dehydrogenase 3 (NAD+) alpha	7.06152e-06	0.00312398
H3159D12	Mm.247837	AW559096	expressed sequence AW559096	7.44266e-06	0.00320817
H3068E07	Mm.273270	Cbll1	Casitas B-lineage lymphoma-like 1	7.48826e-06	0.00314713
H3019A11	Mm.18705	Vps4b	vacuolar protein sorting 4b (yeast)	8.23269e-06	0.00337561
H3049H12	Mm.1387	Rab11a	RAB11a, member RAS oncogene family	8.26313e-06	0.00330741
H3070E04	Mm.38951	Sucla2	succinate-Coenzyme A ligase, ADP-forming, beta subunit	8.78545e-06	0.0034347
H3006F05	Mm.248492	Sec23b	SEC23B (S. cerevisiae)	8.82644e-06	0.0033723
H3127G07	Mm.321048	Map4k5	mitogen-activated protein kinase kinase kinase kinase 5	9.0197e-06	0.00336956
H3027D12	Mm.33764	Ivns1abp	influenza virus NS1A binding protein	9.06523e-06	0.00331295
H3125F05	Mm.30052	Mrpl50	mitochondrial ribosomal protein L50	9.37942e-06	0.00335484
H3011B05			EST	9.45286e-06	0.00331067
H3024H10	Mm.269080	Fignl1	fidgetin-like 1	9.75201e-06	0.00334573
H3114D09	Mm.276337	Rpl17	ribosomal protein L17	1.00942e-05	0.00339388
H3015E08	Mm.28161		Mus musculus Brf2 gene, 3' UTR	1.02492e-05	0.00337841
H3032A09	Mm.222536	Slc25a17	solute carrier family 25 (mitochondrial carrier; peroxisomal membrane protein), member 17	1.02887e-05	0.0033262
H3023D06	Mm.297136		Mus musculus similar to phosphoglycerate kinase (EC 2.7.2.3) - mouse (LOC229309), mRNA	1.04198e-05	0.00330504
H3024H05	Mm.29302	Rab14	RAB14, member RAS oncogene family	1.04614e-05	0.0032568
H3104H06	Mm.784	Nbr1	neighbor of Brca1 gene 1	1.06552e-05	0.00325681
H3012F12	Mm.31512	Rnf2	ring finger protein 2	1.06593e-05	0.00319988
H3105A11	Mm.171256	9530058O11Rik	RIKEN cDNA 9530058O11 gene	1.06978e-05	0.0031551
H3027E06	Mm.62876	D10Ertd749e	DNA segment, Chr 10, ERATO Doi 749, expressed	1.10463e-05	0.0032017
H3010B07	Mm.239196	5730414C17Rik	RIKEN cDNA 5730414C17 gene	1.10952e-05	0.00316137
H3141A02	Mm.291762		Mus musculus 11 days embryo head cDNA, RIKEN full-length enriched library, clone:6230415F21 product:unknown EST, full insert sequence	1.1189e-05	0.00313496
H3143G12	Mm.29214	2010311D03Rik	RIKEN cDNA 2010311D03 gene	1.13177e-05	0.00311904
H3079E09	Mm.262056	AW050020	expressed sequence AW050020	1.14356e-05	0.00310071
H3029H07	Mm.30059	Marcks	myristoylated alanine rich protein kinase C substrate	1.16151e-05	0.00309939
H3103A12	Mm.17853		Mus musculus similar to potassium channel regulator 1 (LOC380959), mRNA	1.18348e-05	0.00310867
H3020C05	Mm.132802	Rab18	RAB18, member RAS oncogene family	1.2362e-05	0.00319718
H3024F03	Mm.30072	Cox7a2l	cytochrome c oxidase subunit VIIa polypeptide 2-like	1.24176e-05	0.00316291
H3079C04	Mm.1894	Cd1d1	CD1d1 antigen	1.29846e-05	0.00325797
H3083H07			EST	1.30525e-05	0.00322686
H3123E08	Mm.218637	Cd2ap	CD2-associated protein	1.31279e-05	0.00319846
H3151C11	Mm.259164	Sec22l2	SEC22 vesicle trafficking protein-like 2 (S. cerevisiae)	1.31797e-05	0.0031652
H3083D12	Mm.26908	Csnk1a1	casein kinase 1, alpha 1	1.37018e-05	0.00324423
H3031H12	Mm.30965	2810421I24Rik	RIKEN cDNA 2810421I24 gene	1.44292e-05	0.00336901
H3028G03	Mm.252529	Robo1	roundabout homolog 1 (Drosophila)	1.50054e-05	0.00345555
H3007G09	Mm.231400	1500003O22Rik	RIKEN cDNA 1500003O22 gene	1.52847e-05	0.00347232
H3009D04	Mm.45233	2400003B06Rik	RIKEN cDNA 2400003B06 gene	1.53915e-05	0.00344996
H3026A04	Mm.105331	Psip2	PC4 and SFRS1 interacting protein 2	1.5499e-05	0.00342835
H3020B07	Mm.290407	Nap1l1	nucleosome assembly protein 1-like 1	1.55867e-05	0.00340296
H3098D12	Mm.248907	Map2k1	mitogen activated protein kinase kinase 1	1.57609e-05	0.00339688
H3020G05	Mm.117709	1110001A05Rik	RIKEN cDNA 1110001A05 gene	1.59017e-05	0.00338384
H3038E06	Mm.292405	Zfp216	zinc finger protein 216	1.62359e-05	0.00341177
H3152H06	Mm.38832	1600019O04Rik	RIKEN cDNA 1600019O04 gene	1.6318e-05	0.00338669
H3015G06	Mm.204670	Txndc1	thioredoxin domain containing 1	1.64011e-05	0.00336242
H3082G06	Mm.297373	Arfip1	ADP-ribosylation factor interacting protein 1	1.70061e-05	0.00344445
H3159B12			EST	1.7041e-05	0.00341044
H3075F01	Mm.38951	Sucla2	succinate-Coenzyme A ligase, ADP-forming, beta subunit	1.73215e-05	0.00342578
H3038E08	Mm.86410	1110054G21Rik	RIKEN cDNA 1110054G21 gene	1.74252e-05	0.00340621
H3010C08	Mm.297530	C820004H04Rik	RIKEN cDNA C820004H04 gene	1.75635e-05	0.0033938
H3086D12	Mm.23829	Kpnb2	karyopherin (importin) beta 2	1.76143e-05	0.00336492
H3008G08	Mm.254979	2900001O04Rik	RIKEN cDNA 2900001O04 gene	1.788e-05	0.0033773
H3014G12	Mm.180052	Ube2d2	ubiquitin-conjugating enzyme E2D 2	1.80465e-05	0.00337089
T042	Mm.256926	Pygl	liver glycogen phosphorylase	1.80483e-05	0.00333417
H3035F11	Mm.122600	Nek2	NIMA (never in mitosis gene a)-related expressed kinase 2	1.84883e-05	0.00337834
H3024C09	Mm.6787	Sfrs3	splicing factor, arginine/serine-rich 3 (SRp20)	1.85497e-05	0.00335312
H3010F04	Mm.297138	Rbm3	RNA binding motif protein 3	1.87712e-05	0.00335705
H3120H04	Mm.249096	Atp6v1b2	ATPase, H+ transporting, V1 subunit B, isoform 2	1.9603e-05	0.0034689
H3057D08	Mm.37801	Shcbp1	Shc SH2-domain binding protein 1	1.98575e-05	0.00347734
H3047A07	Mm.831	Ssr4	signal sequence receptor, delta	2.02519e-05	0.00350983
H3016A01	Mm.3879	Hif1a	hypoxia inducible factor 1, alpha subunit	2.03308e-05	0.00348756
H3031F11	Mm.993	Dhx15	DEAH (Asp-Glu-Ala-His) box polypeptide 15	2.04843e-05	0.0034784
H3140B04	Mm.289942	Mtpn	myotrophin	2.05916e-05	0.00346166
H3141E11	Mm.17640	Psmd10	proteasome (prosome, macropain) 26S subunit, non-ATPase, 10	2.11372e-05	0.00351819
H3149D08	Mm.170182	Luc7l2	LUC7-like 2 (S. cerevisiae)	2.14438e-05	0.00353424
H3022H03	Mm.25559	Stk17b	serine/threonine kinase 17b (apoptosis-inducing)	2.14504e-05	0.003501
H3004E01	Mm.24229	2010300G19Rik	RIKEN cDNA 2010300G19 gene	2.1454e-05	0.00346792
H3015F12	Mm.238034	1110056N09Rik	RIKEN cDNA 1110056N09 gene	2.14684e-05	0.0034372
H3010H06	Mm.275013	Eif5	eukaryotic translation initiation factor 5	2.14728e-05	0.00340547
H3071D02	Mm.234368	Klhdc2	kelch domain containing 2	2.19626e-05	0.00345059
H3136C02	Mm.289791	1110001A23Rik	RIKEN cDNA 1110001A23 gene	2.2694e-05	0.00353249
H3002F01	Mm.259113	Hnrpdl	heterogeneous nuclear ribonucleoprotein D-like	2.27143e-05	0.00350321
H3029E10	Mm.23670	2310010B21Rik	RIKEN cDNA 2310010B21 gene	2.32744e-05	0.00355696
H3148A10	Mm.6276	U2af1-rs2	U2 small nuclear ribonucleoprotein auxiliary factor (U2AF) 1, related sequence 2	2.33672e-05	0.00353897
H3022H08	Mm.121265	Psma1	proteasome (prosome, macropain) subunit, alpha type 1	2.35564e-05	0.00353578
H3032B07	Mm.187470	AL024069	expressed sequence AL024069	2.36797e-05	0.00352283
H3051D07	Mm.22363	Rarsl	arginyl-tRNA synthetase-like	2.42261e-05	0.0035725
H3025H12	Mm.271975	1200003O06Rik	RIKEN cDNA 1200003O06 gene	2.42684e-05	0.00354762
H3109D09	Mm.200783	Ssx2ip	synovial sarcoma, X breakpoint 2 interacting protein	2.43379e-05	0.00352711
H3084A06	Mm.318290		Mus musculus transcribed sequences	2.44114e-05	0.00350752
H3050D10	Mm.24083	Tardbp	TAR DNA binding protein	2.45705e-05	0.00350046
H3010F08	Mm.26734	Gcnt2	glucosaminyltransferase, I-branching enzyme	2.48092e-05	0.00350476
H3117F05	Mm.276356		Mus musculus 13 days embryo brain cDNA, RIKEN full-length enriched library, clone:G630031O20 product:SINGLE-STRANDED DNA BINDING PRECURSOR homolog [Oryctolagus cuniculus], full insert sequence	2.50131e-05	0.00350413
H3013C12	Mm.206841	Smc4l1	SMC4 structural maintenance of chromosomes 4-like 1 (yeast)	2.50866e-05	0.00348538
H3022C10	Mm.247272	AA408868	expreexpressed sequence AA408868	2.53761e-05	0.00349671
H3041H11	Mm.215471	BC002199	cDNA sequence BC002199	2.54262e-05	0.00347512
H3121D08	Mm.41728	Echdc1	enoyl Coenzyme A hydratase domain containing 1	2.5913e-05	0.00351309
H3102F12			EST	2.59905e-05	0.00349541
H3084A12	Mm.35059	Arhgap5	Rho GTPase activating protein 5	2.62204e-05	0.00349835
H3016B11	Mm.299153	D330003H11Rik	RIKEN cDNA D330003H11 gene	2.63699e-05	0.00349058
H3148H07	Mm.250617	1700034H14Rik	RIKEN cDNA 1700034H14 gene	2.66046e-05	0.00349414
P839	Mm.7141	Pcna	proliferating cell nuclear antigen	2.71419e-05	0.00353708
H3080C04	Mm.155	2610204K14Rik	RIKEN cDNA 2610204K14 gene	2.71793e-05	0.00351471
H3073F08	Mm.268708	L3mbtl3	l(3)mbt-like 3 (Drosophila)	2.76447e-05	0.00354759
H3014G10	Mm.256422	Zfp162	zinc finger protein 162	2.793e-05	0.00355705
H3068F01	Mm.260594	2510002A14Rik	RIKEN cDNA 2510002A14 gene	2.83018e-05	0.00357731
H3032G12	Mm.29909		Mus musculus 13 days embryo forelimb cDNA, RIKEN full-length enriched library, clone:5930433F13 product:unknown EST, full insert sequence	2.8646e-05	0.00359379
H3007E06	Mm.1408	Adm	adrenomedullin	2.87737e-05	0.00358307
H3007C03	Mm.199964	D10Ertd438e	DNA segment, Chr 10, ERATO Doi 438, expressed	3.00176e-05	0.00371049
H3117B04	Mm.280560	9030425E11Rik	RIKEN cDNA 9030425E11 gene	3.00646e-05	0.00368917
H3125B07	Mm.159684	Tmpo	thymopoietin	3.0344e-05	0.00369648
H3014F11	Mm.259227	C330039G02Rik	RIKEN cDNA C330039G02 gene	3.05611e-05	0.00369613
H3010H02	Mm.255398	Nup153	nucleoporin 153	3.07374e-05	0.0036909
H3025A04	Mm.204831	1110007M04Rik	RIKEN cDNA 1110007M04 gene	3.08781e-05	0.0036815
H3140B09	Mm.181624	Adck5	aarF domain containing kinase 5	3.09743e-05	0.00366697
H3065F09	Mm.30737	D1Ertd578e	DNA segment, Chr 1, ERATO Doi 578, expressed	3.15273e-05	0.00370633
H3141F10	Mm.246869	8430423A01Rik	RIKEN cDNA 8430423A01 gene	3.15973e-05	0.00368876
H3066H09	Mm.29302	Rab14	RAB14, member RAS oncogene family	3.25014e-05	0.00376815
H3044D10	Mm.103534	Chordc1	cysteine and histidine-rich domain (CHORD)-containing, zinc-binding protein 1	3.25964e-05	0.00375327
H3021G05	Mm.200885	1110033A15Rik	RIKEN cDNA 1110033A15 gene	3.32276e-05	0.00379992
P318	Mm.228433	Slc12a2	solute carrier family 12, member 2	3.32714e-05	0.00377923
H3013G09	Mm.326952		Mus musculus transcribed sequence with strong similarity to protein pir:S50853 (H.sapiens) S50853 translation releasing factor eRF-1 [validated] - human	3.44049e-05	0.00388175
H3089G05	Mm.24125	Col4a3bp	collagen, type IV, alpha 3 (Goodpasture antigen) binding protein	3.46311e-05	0.00388122
H3045H05	Mm.5904	2700038P16Rik	RIKEN cDNA 2700038P16 gene	3.47104e-05	0.00386435
P323	Mm.3093	Serpine2	serine (or cysteine) proteinase inhibitor, clade E, member 2	3.47774e-05	0.00384633
H3060E07	Mm.274160	Sah	SA rat hypertension-associated homolog	3.50214e-05	0.003848
H3035E08			EST	3.50526e-05	0.00382642
H3143B01	Mm.234139	Tpp2	tripeptidyl peptidase II	3.5201e-05	0.00381783
H3039C12			EST	3.5759e-05	0.0038535
H3011D04	Mm.25709	Ing1	inhibitor of growth family, member 1	3.62444e-05	0.00388092
H3002A02			EST	3.66141e-05	0.00389569
T057	Mm.2445	Acadl	acetyl-Coenzyme A dehydrogenase, long-chain	3.67642e-05	0.00388707
H3137F11	Mm.3160	Uros	uroporphyrinogen III synthase	3.70616e-05	0.00389402
H3156H06	Mm.30927	3300001P08Rik	RIKEN cDNA 3300001P08 gene	3.71611e-05	0.00388022
H3048E12	Mm.223504	Waspip	Wiskott-Aldrich syndrome protein interacting protein	3.73312e-05	0.00387392
H3058C08	Mm.276572	Rras2	related RAS viral (r-ras) oncogene homolog 2	3.74265e-05	0.00385998
H3056F10	Mm.22627	Eps15	epidermal growth factor receptor pathway substrate 15	3.77684e-05	0.00387149
H3071E12	Mm.259333	C530050K14	hypothetical protein C530050K14	3.81491e-05	0.00388682
T008	Mm.297136		Mus musculus similar to phosphoglycerate kinase (EC 2.7.2.3) - mouse (LOC229309), mRNA	3.85157e-05	0.00390052
H3006A07	Mm.1782	Rcn2	reticulocalbin 2	3.85853e-05	0.00388418
H3077C09	Mm.315959	Nap1l1	nucleosome assembly protein 1-like 1	3.88838e-05	0.00389093
P452	Mm.253087	Gas2	growth arrest specific 2	3.89889e-05	0.00387836
H3150H12			EST	3.93278e-05	0.00388906
H3012A09	Mm.209281	Eif4e	eukaryotic translation initiation factor 4E	3.9452e-05	0.00387853
H3011D09	Mm.30072	Cox7a2l	cytochrome c oxidase subunit VIIa polypeptide 2-like	3.95851e-05	0.00386898
H3075H08	Mm.244820	Tbp	TATA box binding protein	3.95893e-05	0.00384703
T112	Mm.2785	Dbi	diazepam binding inhibitor	3.97618e-05	0.00384159
H3104G04	Mm.182328		Mus musculus transcribed sequence with moderate similarity to protein sp:Q9Y3D8 (H.sapiens) CGD7_HUMAN Protein CGI-137 (Protein AD-004)	3.98322e-05	0.0038264
H3093B10	Mm.286282		Mus musculus adult male corpora quadrigemina cDNA, RIKEN full-length enriched library, clone:B230208M22 product:HIV-1 REV BINDING PROTEIN 2 homolog [Homo sapiens], full insert sequence	4.06029e-05	0.00387827
H3024F01	Mm.23847	Lrp2	low density lipoprotein receptor-related protein 2	4.07919e-05	0.00387431
P317	Mm.234608	Slc11a2	solute carrier family 11 (proton-coupled divalent metal ion transporters), member 2	4.0813e-05	0.00385454
H3154D07			EST	4.1081e-05	0.00385817
H3011F12	Mm.297373	Arfip1	ADP-ribosylation factor interacting protein 1	4.12169e-05	0.00384943
H3068E09			EST	4.14945e-05	0.00385395
T472	Mm.12155	Stxbp3	syntaxin binding protein 3	4.16629e-05	0.00384833
H3080A02	Mm.2018	Cbfb	core binding factor beta	4.17197e-05	0.00383252
H3073D12			EST	4.19039e-05	0.00382852
P146	Mm.31915	Cav2	caveolin 2	4.22733e-05	0.00384139
P637	Mm.14543	Edn1	endothelin 1	4.23481e-05	0.00382749
H3043H09	Mm.280230	1500005G05Rik	RIKEN cDNA 1500005G05 gene	4.27645e-05	0.00384446
H3047D12			EST	4.28415e-05	0.0038309
H3109B07	Mm.17647	A830059A17Rik	RIKEN cDNA A830059A17 gene	4.30541e-05	0.00382954
H3018H11	Mm.246466	Kctd12	potassium channel tetramerisation domain containing 12	4.38024e-05	0.00387559
H3135G10	Mm.26704	Stch	stress 70 protein chaperone, microsome-associated, human homolog	4.406e-05	0.00387797
H3102B09	Mm.196846	Rad23b	RAD23b homolog (S. cerevisiae)	4.43065e-05	0.00387935
H3131C01	Mm.25410	1700022L09Rik	RIKEN cDNA 1700022L09 gene	4.43707e-05	0.00386485
H3030E09	Mm.103534	Chordc1	cysteine and histidine-rich domain (CHORD)-containing, zinc-binding protein 1	4.5298e-05	0.00392529
H3006H06	Mm.298092	Calm2	calmodulin 2	4.55895e-05	0.00393028
P663	Mm.250	Gbp1	guanylate nucleotide binding protein 1	4.61306e-05	0.00395664
H3022G02	Mm.2462	Psmc2	proteasome (prosome, macropain) 26S subunit, ATPase 2	4.6322e-05	0.00395289
H3007E05	Mm.1408	Adm	adrenomedullin	4.63923e-05	0.00393889
H3068G11	Mm.18203	Eed	embryonic ectoderm development	4.6644e-05	0.00394036
H3010D08	Mm.270065	Gas5	growth arrest specific 5	4.69716e-05	0.0039482
H3027D01	Mm.1761	Clk	CDC-like kinase	4.71344e-05	0.00394217
H3018F12	Mm.28053	1110017C15Rik	RIKEN cDNA 1110017C15 gene	4.76637e-05	0.0039667
H3040B04			EST	4.77738e-05	0.00395628
H3011A05			EST	4.79727e-05	0.00395328
H3009B03	Mm.256858	Dnclc1	dynein, cytoplasmic, light chain 1	4.87934e-05	0.0040013
H3011F11	Mm.21841	Sfrs2	splicing factor, arginine/serine-rich 2 (SC-35)	4.89097e-05	0.00399136
H3040E06	Mm.157190	Hmga2	high mobility group AT-hook 2	4.94761e-05	0.00401808
H3089G02	Mm.210405	Mtmr2	myotubularin related protein 2	4.95749e-05	0.00400675
H3021B04	Mm.246304	Sypl	synaptophysin-like protein	4.9676e-05	0.00399571
H3016A12	Mm.28221	AW544865	expressed sequence AW544865	5.02338e-05	0.00402134
H3107F05	Mm.24805	Uqcrb	ubiquinol-cytochrome c reductase binding protein	5.05023e-05	0.00402367
H3005D04	Mm.276337	Rpl17	ribosomal protein L17	5.08667e-05	0.00403359
H3075F06	Mm.26148	1810055E12Rik	RIKEN cDNA 1810055E12 gene	5.11831e-05	0.00403962
H3086D07	Mm.86687	2310079P03Rik	RIKEN cDNA 2310079P03 gene	5.15056e-05	0.00404608
H3003B03	Mm.295252	Ppid	peptidylprolyl isomerase D (cyclophilin D)	5.16653e-05	0.00403974
H3037H11	Mm.275191	Tm9sf2	transmembrane 9 superfamily member 2	5.17721e-05	0.00402935
P895	Mm.248042	Stx7	syntaxin 7	5.27073e-05	0.00408324
H3085F12	Mm.260626	Capza2	capping protein (actin filament) muscle Z-line, alpha 2	5.27664e-05	0.00406906
H3012H10			EST	5.3453e-05	0.00410319
H3087F09			EST	5.35561e-05	0.00409241
H3001B04	Mm.3819	Cox7a2	cytochrome c oxidase, subunit VIIa 2	5.35866e-05	0.00407622
H3143G03	Mm.28500	Mtap	methylthioadenosine phosphorylase	5.37358e-05	0.00406916
T338	Mm.255848	Hk2	hexokinase 2	5.45186e-05	0.00410992
H3075C10	Mm.194462	Abcd3	ATP-binding cassette, sub-family D (ALD), member 3	5.47892e-05	0.00411188
H3059F10	Mm.212694		Mus musculus 0 day neonate head cDNA, RIKEN full-length enriched library, clone:4833405L11 product:unknown EST, full insert sequence	5.48611e-05	0.00409898
H3075F11	Mm.21549	Cryac	crystallin, alpha C	5.54559e-05	0.00412508
H3004F07	Mm.193688	Ptp4a2	protein tyrosine phosphatase 4a2	5.57113e-05	0.00412583
H3006F07	Mm.21062	C87860	expressed sequence C87860	5.57433e-05	0.00411009
H3067F03	Mm.291936	Map4k5	mitogen-activated protein kinase kinase kinase kinase 5	5.58031e-05	0.00409653
H3001H08	Mm.1408	Adm	adrenomedullin	5.59294e-05	0.00408795
H3104E07	Mm.1574	Wasl	Wiskott-Aldrich syndrome-like (human)	5.60488e-05	0.00407894
H3066F01	Mm.28262	Rgs2	regulator of G-protein signaling 2	5.67256e-05	0.0041104
H3065H10			EST	5.70172e-05	0.0041138
P069	Mm.240830	Dab2	disabled homolog 2 (Drosophila)	5.71758e-05	0.00410761
H3102H06	Mm.25306	Rab9	RAB9, member RAS oncogene family	5.75451e-05	0.00411656
P087	Mm.292510	Rac1	RAS-related C3 botulinum substrate 1	5.76074e-05	0.00410355
H3108B05	Mm.273196	Srp9	signal recognition particle 9	5.78012e-05	0.00409998
H3058D02	Mm.173083		Mus musculus transcribed sequences	5.79819e-05	0.00409552
H3077H01	Mm.276536	Timm8b	translocase of inner mitochondrial membrane 8 homolog b (yeast)	5.83576e-05	0.00410481
H3031E05	Mm.291928	Catnb	catenin beta	5.84132e-05	0.0040916
H3080E11	Mm.27171	Ap3s1	adaptor-related protein complex 3, sigma 1 subunit	5.88019e-05	0.00410173
H3144A03	Mm.86627	2210010B09Rik	RIKEN cDNA 2210010B09 gene	5.96955e-05	0.00414687
H3136G10	Mm.228433	Slc12a2	solute carrier family 12, member 2	5.987e-05	0.00414187
H3150A10	Mm.276503	2700023B17Rik	RIKEN cDNA 2700023B17 gene	5.99441e-05	0.00413
P147	Mm.46248	Pyy	peptide YY	6.02454e-05	0.00413382
H3075D03	Mm.260282	5430405G24Rik	RIKEN cDNA 5430405G24 gene	6.02826e-05	0.00411955
H3027D02	Mm.218889	1110001C20Rik	RIKEN cDNA 1110001C20 gene	6.03078e-05	0.00410459
H3080G11			EST	6.04432e-05	0.00409722
H3040D05	Mm.292470	AA545217	expressed sequence AA545217	6.05429e-05	0.00408749
H3070F06	Mm.245867	2410017C19Rik	RIKEN cDNA 2410017C19 gene	6.09962e-05	0.00410163
H3005D12	Mm.197387	Bicd2	bicaudal D homolog 2 (Drosophila)	6.11069e-05	0.0040927
H3018D12	Mm.30210	Psma6	proteasome (prosome, macropain) subunit, alpha type 6	6.1801e-05	0.00412277
H3040C12	Mm.298110	Eef1a1	eukaryotic translation elongation factor 1 alpha 1	6.23986e-05	0.00414617
H3087H01	Mm.41758	Jam2	junction adhesion molecule 2	6.24323e-05	0.00413209
H3122G11	Mm.130362	Top2b	topoisomerase (DNA) II beta	6.28129e-05	0.00414097
H3042F09	Mm.156464	Dusp19	dual specificity phosphatase 19	6.30434e-05	0.00413993
H3021F12	Mm.7141	Pcna	proliferating cell nuclear antigen	6.30524e-05	0.00412441
H3017C04	Mm.28811	D330037H05Rik	RIKEN cDNA D330037H05 gene	6.32442e-05	0.00412092
H3090F03			EST	6.38603e-05	0.004145
H3154B07	Mm.4266	Itm2b	integral membrane protein 2B	6.39027e-05	0.0041318
H3066H10	Mm.21495	Mapk8	mitogen activated protein kinase 8	6.39431e-05	0.00411857
H3105H03	Mm.126534	Paip2	polyadenylate-binding protein-interacting protein 2	6.40963e-05	0.00411268
H3158B08	Mm.31175	Prkab2	protein kinase, AMP-activated, beta 2 non-catalytic subunit	6.41753e-05	0.00410209
H3128E10	Mm.301379		Mus musculus adult male testis cDNA, RIKEN full-length enriched library, clone:4930502N04 product:SIMILAR TO HYPOTHETICAL PROTEIN FLJ20727 homolog [Homo sapiens], full insert sequence	6.42238e-05	0.00408964
H3113F01	Mm.278726	Mak3p	Mak3p homolog (S. cerevisiae)	6.46601e-05	0.00410189
P555	Mm.86386	Dffb	DNA fragmentation factor, beta subunit	6.49756e-05	0.00410641
H3107C03	Mm.245566	Crsp2	cofactor required for Sp1 transcriptional activation subunit 2	6.49824e-05	0.00409146
H3041B09	Mm.21705	1110049G11Rik	RIKEN cDNA 1110049G11 gene	6.5461e-05	0.00410621
P095	Mm.182931	Paics	phosphoribosylaminoimidazole carboxylase, phosphoribosylaminoribosylaminoimidazole, succinocarboxamide synthetase	6.60671e-05	0.00412883
H3105B08	Mm.54126	1200006O19Rik	RIKEN cDNA 1200006O19 gene	6.66384e-05	0.0041491
H3047G03			EST	6.6689e-05	0.00413693
H3021B07			EST	6.68164e-05	0.0041296
H3067A07	Mm.29194	Kcmf1	potassium channel modulatory factor 1	6.70435e-05	0.00412845
H3127A12	Mm.270186	Rbbp7	retinoblastoma binding protein 7	6.70719e-05	0.00411513
H3053C07	Mm.194486	Phf3	PHD finger protein 3	6.72305e-05	0.00410986
H3021F05	Mm.327628		Mus musculus transcribed sequence with strong similarity to protein sp:P52292 (H.sapiens) IMA2_HUMAN Importin alpha-2 subunit (Karyopherin alpha-2 subunit) (SRP1-alpha) (RAG cohort protein 1)	6.73748e-05	0.00410376
H3097C07	Mm.132868	Rbbp5	retinoblastoma binding protein 5	6.7445e-05	0.0040932
H3029C04	Mm.295742	Hnrpm	heterogeneous nuclear ribonucleoprotein M	6.76356e-05	0.00409001
H3046H09	Mm.257149		Mus musculus 2 days pregnant adult female ovary cDNA, RIKEN full-length enriched library, clone:E330027A01 product:unknown EST, full insert sequence	6.78718e-05	0.00408958
H3113A02	Mm.202360	Chrac1	chromatin accessibility complex 1	6.81844e-05	0.00409374
H3077B05	Mm.155687	D7Ertd413e	DNA segment, Chr 7, ERATO Doi 413, expressed	6.83188e-05	0.00408722
H3114D12	Mm.4269	Tcf4	transcription factor 4	6.83964e-05	0.00407735
H3022D11	Mm.48686	Ppp4r1	protein phosphatase 4, regulatory subunit 1	6.97999e-05	0.00414631
H3095E05			EST	7.00657e-05	0.00414744
H3079B05	Mm.22362	H47	histocompatibility 47	7.00675e-05	0.004133
H3060G06	Mm.31512	Rnf2	ring finger protein 2	7.03868e-05	0.00413731
P579	Mm.270109	Nr2f2	nuclear receptor subfamily 2, group F, member 2	7.09156e-05	0.00415388
H3018A08	Mm.17989	Cct8	chaperonin subunit 8 (theta)	7.21357e-05	0.00421067
H3039H03			EST	7.21464e-05	0.00419673
H3099E05	Mm.14155	9230112O05Rik	RIKEN cDNA 9230112O05 gene	7.23823e-05	0.00419593
H3035H03	Mm.10699	Vamp4	vesicle-associated membrane protein 4	7.2583e-05	0.0041931
H3111C08	Mm.19130	Elovl5	ELOVL family member 5, elongation of long chain fatty acids (yeast)	7.26438e-05	0.00418224
H3063D10			EST	7.34727e-05	0.00421553
H3039B10			EST	7.43324e-05	0.00425034
H3029A12	Mm.297056	Psma3	proteasome (prosome, macropain) subunit, alpha type 3	7.43872e-05	0.00423906
H3085F11	Mm.41728	Echdc1	enoyl Coenzyme A hydratase domain containing 1	7.46337e-05	0.00423874
H3103H03	Mm.102752	C1galt1	core 1 UDP-galactose:N-acetylgalactosamine-alpha-R beta 1,3-galactosyltransferase	7.46629e-05	0.00422612
H3157B10	Mm.27897	Dnaja1	DnaJ (Hsp40) homolog, subfamily A, member 1	7.54561e-05	0.00425668
H3016E07	Mm.29061	Rrs1	RRS1 ribosome biogenesis regulator homolog (S. cerevisiae)	7.58655e-05	0.00426547
H3006B04	Mm.28063	5730466P16Rik	RIKEN cDNA 5730466P16 gene	7.60427e-05	0.00426118
H3098C08			EST	7.74202e-05	0.00432396
H3060B09	Mm.291936	Map4k5	mitogen-activated protein kinase kinase kinase kinase 5	7.80089e-05	0.00434241
H3008D01	Mm.195753	Pole4	polymerase (DNA-directed), epsilon 4 (p12 subunit)	7.81744e-05	0.00433726
H3071C08	Mm.291828	1810057B09Rik	RIKEN cDNA 1810057B09 gene	7.81973e-05	0.00432426
H3009E09	Mm.24337	D14Ertd732e	DNA segment, Chr 14, ERATO Doi 732, expressed	7.85283e-05	0.00432833
H3067A12	Mm.222184	Nup37	nucleoporin 37	7.9316e-05	0.00435746
H3090E06	Mm.170002	AI848100	expressed sequence AI848100	7.96388e-05	0.00436094
H3012F04	Mm.2551	Sec22l1	SEC22 vesicle trafficking protein-like 1 (S. cerevisiae)	7.97249e-05	0.00435148
H3086H04	Mm.245566	Crsp2	cofactor required for Sp1 transcriptional activation subunit 2	7.99558e-05	0.00434996
H3031B07	Mm.10153	Twsg1	twisted gastrulation homolog 1 (Drosophila)	8.00572e-05	0.00434142
H3015A12	Mm.249648	AW547186	expressed sequence AW547186	8.01977e-05	0.00433506
H3082B11	Mm.28319	BC046518	cDNA sequence BC046518	8.02752e-05	0.00432534
T028	Mm.38951	Sucla2	succinate-Coenzyme A ligase, ADP-forming, beta subunit	8.06454e-05	0.0043314
H3020H08	Mm.38832	1600019O04Rik	RIKEN cDNA 1600019O04 gene	8.07138e-05	0.00432127
H3019H08	Mm.212066	Abi2	abl-interactor 2	8.07807e-05	0.00431113
P050	Mm.38444	Cdc25b	cell division cycle 25 homolog B (S. cerevisiae)	8.09507e-05	0.00430653
H3138G08	Mm.293635	1700020E22Rik	RIKEN cDNA 1700020E22 gene	8.13757e-05	0.00431548
H3072F07	Mm.173763		Mus musculus transcribed sequences	8.17986e-05	0.00432427
H3102D09	Mm.270186	Rbbp7	retinoblastoma binding protein 7	8.2039e-05	0.00432338
H3125D10	Mm.283592		Mus musculus transcribed sequences	8.24207e-05	0.00432992
H3065C02	Mm.41800	Gtpbp4	GTP binding protein 4	8.27771e-05	0.0043351
H3087C10	Mm.260183	Arhgap6	Rho GTPase activating protein 6	8.27947e-05	0.00432255
H3065E11	Mm.173577		Mus musculus transcribed sequences	8.29581e-05	0.00431767
H3010C04	Mm.298233	Pabpc1	poly A binding protein, cytoplasmic 1	8.29592e-05	0.0043044
H3143A12	Mm.286457	Bet1	blocked early in transport 1 homolog (S. cerevisiae)	8.33303e-05	0.00431035
H3019H03	Mm.265620	Lass6	longevity assurance homolog 6 (S. cerevisiae)	8.33473e-05	0.00429801
H3034D02	Mm.74730	6230416J20Rik	RIKEN cDNA 6230416J20 gene	8.34724e-05	0.0042913
H3071G01	Mm.245522	Ankrd17	ankyrin repeat domain 17	8.38062e-05	0.00429532
H3112A05	Mm.246108	0910001A06Rik	RIKEN cDNA 0910001A06 gene	8.38415e-05	0.00428407
H3099H12			EST	8.42284e-05	0.0042908
H3035A08	Mm.262480	2010012F05Rik	RIKEN cDNA 2010012F05 gene	8.473e-05	0.00430331
H3024C03	Mm.270851	1110008B24Rik	RIKEN cDNA 1110008B24 gene	8.48448e-05	0.00429616
H3001B02	Mm.158801	Rod1	ROD1 regulator of differentiation 1 (S. pombe)	8.50556e-05	0.0042939
H3060E02	Mm.255488	Pcdh7	protocadherin 7	8.54202e-05	0.0042994
H3128C12	Mm.29822	Hp1bp3	heterochromatin protein 1, binding protein 3	8.66409e-05	0.00434782
H3019D10	Mm.143877	Mapre1	microtubule-associated protein, RP/EB family, member 1	8.73242e-05	0.00436907
H3084B07	Mm.288713	Pter	phosphotriesterase related	8.74583e-05	0.00436279
H3040F12	Mm.24995	4921526G09Rik	RIKEN cDNA 4921526G09 gene	8.77634e-05	0.00436506
H3028F04	Mm.930	Ctsl	cathepsin L	8.77667e-05	0.00435235
H3014E03	Mm.28765	Tram1	translocating chain-associating membrane protein 1	8.79591e-05	0.00434906
H3108E09	Mm.17640	Psmd10	proteasome (prosome, macropain) 26S subunit, non-ATPase, 10	8.84452e-05	0.00436027
P456	Mm.12468	Gbas	glioblastoma amplified sequence	8.92484e-05	0.004387
H3059A11	Mm.66222	Cxadr	coxsackievirus and adenovirus receptor	8.94729e-05	0.00438521
H3099F03	Mm.211211	2310032D16Rik	RIKEN cDNA 2310032D16 gene	9.02956e-05	0.00441267
H3054A10	Mm.28847	2410005L11Rik	RIKEN cDNA 2410005L11 gene	9.03487e-05	0.00440247
H3018D04	Mm.298459	Rap1b	RAS related protein 1b	9.22222e-05	0.00448077
H3028F03	Mm.930	Ctsl	cathepsin L	9.26221e-05	0.00448723
H3004B02	Mm.253136	Txndc4	thioredoxin domain containing 4 (endoplasmic reticulum)	9.2771e-05	0.00448153
H3064E02	Mm.217787	Atp6v1a1	ATPase, H+ transporting, V1 subunit A, isoform 1	9.31801e-05	0.0044884
H3101G11			EST	9.39933e-05	0.00451463
H3039A05	Mm.109840	Rgs11	regulator of G-protein signaling 11	9.41585e-05	0.00450968
H3158B06	Mm.292108	Dr1	down-regulator of transcription 1	9.41893e-05	0.00449834
H3020G02	Mm.9550	Lass5	longevity assurance homolog 5 (S. cerevisiae)	9.45379e-05	0.0045022
H3112A07	Mm.294136	Ccnd2	cyclin D2	9.45515e-05	0.00449013
H3023B05	Mm.24433	Smt3h1	SMT3 (supressor of mif two, 3) homolog 1 (S. cerevisiae)	9.45872e-05	0.00447917
H3035D12	Mm.24928		Mus musculus 2 days pregnant adult female oviduct cDNA, RIKEN full-length enriched library, clone:E230006M18 product:unclassifiable, full insert sequence	9.49219e-05	0.00448239
H3077D09	Mm.287354	2700038M07Rik	RIKEN cDNA 2700038M07 gene	9.50565e-05	0.00447618
H3082D12	Mm.240184	Ube2d3	ubiquitin-conjugating enzyme E2D 3 (UBC4/5 homolog, yeast)	9.52867e-05	0.00447448
H3119H04	Mm.276016	Facl3	fatty acid Coenzyme A ligase, long chain 3	9.53633e-05	0.00446561
H3016A03	Mm.256975	Nras	neuroblastoma ras oncogene	9.57214e-05	0.00446992
T209	Mm.1514	Lpl	lipoprotein lipase	9.61929e-05	0.0044795
P575	Mm.14138	Crisp3	cysteine-rich secretory protein 3	9.66067e-05	0.00448634
H3146E01	Mm.2870	Rpa2	replication protein A2	9.74887e-05	0.00451483
H3144E07	Mm.248042	Stx7	syntaxin 7	9.77381e-05	0.00451394
T354	Mm.16228	Slc25a4	solute carrier family 25 (mitochondrial carrier; adenine nucleotide translocator), member 4	9.78102e-05	0.0045049
H3021H08	Mm.25558	Rybp	RING1 and YY1 binding protein	9.80776e-05	0.00450487
H3005H03	Mm.132802	Rab18	RAB18, member RAS oncogene family	9.97158e-05	0.00456764
H3135G05	Mm.33376	Shoc2	soc-2 (suppressor of clear) homolog (C. elegans)	0.00010094	0.00461116
H3050F02	Mm.289914	D1Ertd396e	DNA segment, Chr 1, ERATO Doi 396, expressed	0.000101064	0.00460432
H3076F03	Mm.43212	D7Ertd743e	DNA segment, Chr 7, ERATO Doi 743, expressed	0.00010126	0.00460076
H3074D02	Mm.194486	Phf3	PHD finger protein 3	0.000101937	0.00461906
H3012C03	Mm.19142	Cappa1	capping protein alpha 1	0.000102171	0.00461721
H3118F07	Mm.43278	Olfm1	olfactomedin 1	0.000102728	0.0046299
H3158A05	Mm.63456	Btbd7	BTB (POZ) domain containing 7	0.000103171	0.00463746
H3053H05	Mm.27441		Mus musculus adult male stomach cDNA, RIKEN full-length enriched library, clone:2210410P13 product:unknown EST, full insert sequence	0.000103369	0.00463397
H3041D09	Mm.1103		Mus musculus similar to NADH dehydrogenase (LOC230075), mRNA	0.000103401	0.00462309
H3099G07	Mm.274756	2810468K05Rik	RIKEN cDNA 2810468K05 gene	0.000104045	0.00463952
H3090E01	Mm.249328	Wdr5	WD repeat domain 5	0.000104269	0.00463719
H3008G06	Mm.22347	Pnn	pinin	0.000104711	0.00464457
H3151B04	Mm.293992	Gtf2a2	general transcription factor II A, 2	0.00010499	0.00464472
H3128A12			EST	0.000105626	0.00466057
H3102E01	Mm.29194	Kcmf1	potassium channel modulatory factor 1	0.00010585	0.00465822
H3104D05	Mm.139314	Dppa5	developmental pluripotency associated 5	0.000106447	0.00467226
H3095B09	Mm.132532	Cln8	ceroid-lipofuscinosis, neuronal 8	0.000106754	0.00467356
H3111F12	Mm.247113	A230103N10Rik	RIKEN cDNA A230103N10 gene	0.000107178	0.00467992
T040	Mm.29201	Gbe1	glucan (1,4-alpha-), branching enzyme 1	0.000107231	0.00467009
H3128A10	Mm.29909		Mus musculus 13 days embryo forelimb cDNA, RIKEN full-length enriched library, clone:5930433F13 product:unknown EST, full insert sequence	0.000107494	0.00466944
H3002E05	Mm.271944	Rab1	RAB1, member RAS oncogene family	0.000107546	0.0046597
H3070H10	Mm.276503	2700023B17Rik	RIKEN cDNA 2700023B17 gene	0.000109528	0.00473337
H3086G10	Mm.1314	Kdt1	kidney cell line derived transcript 1	0.000112112	0.00483262
H3149G05	Mm.250419	Ccni	cyclin I	0.000112117	0.00482046
H3057F02	Mm.219813	B230339H12Rik	RIKEN cDNA B230339H12 gene	0.000112693	0.00483287
H3108G01	Mm.22627	Eps15	epidermal growth factor receptor pathway substrate 15	0.00011305	0.00483582
H3006H05	Mm.298092	Calm2	calmodulin 2	0.000113542	0.00484457
H3047C12	Mm.19330	5730508B09Rik	RIKEN cDNA 5730508B09 gene	0.000114848	0.00488786
H3121D07	Mm.287693	Pcdhga12	protocadherin gamma subfamily A, 12	0.000114882	0.00487699
H3147D01	Mm.259113	Hnrpdl	heterogeneous nuclear ribonucleoprotein D-like	0.000115882	0.00490702
H3021B12	Mm.11480	2810470K21Rik	RIKEN cDNA 2810470K21 gene	0.000116563	0.00492346
H3058B02	Mm.2777	Tpd52	tumor protein D52	0.00011669	0.00491649
H3143H12	Mm.253800	Gls	glutaminase	0.000116944	0.00491488
H3026D10	Mm.27897	Dnaja1	DnaJ (Hsp40) homolog, subfamily A, member 1	0.000117961	0.00494525
H3064B06	Mm.16753	Chek1	checkpoint kinase 1 homolog (S. pombe)	0.000118601	0.00495971
H3156H08	Mm.258352	4121402D02Rik	RIKEN cDNA 4121402D02 gene	0.000118785	0.00495509
H3073D01	Mm.275742	Igf1r	insulin-like growth factor I receptor	0.000118984	0.00495111
H3119E07	Mm.292180	2310003F20Rik	RIKEN cDNA 2310003F20 gene	0.000119122	0.00494459
H3078F07	Mm.294985	1810029B16Rik	RIKEN cDNA 1810029B16 gene	0.000120009	0.00496915
H3145H02	Mm.26017	3100002M17Rik	RIKEN cDNA 3100002M17 gene	0.000120122	0.00496161
H3089A09	Mm.57286	1700034P14Rik	RIKEN cDNA 1700034P14 gene	0.000120364	0.00495941
H3028A04	Mm.300126		Mus musculus transcribed sequence with strong similarity to protein pdb:2RMA (H.sapiens) S Chain S, Cyclophilin A (E.C.5.2.1.8) Complexed With Cyclosporin A	0.000120842	0.00496695
H3058H08	Mm.127156	Pros1	protein S (alpha)	0.000121155	0.00496766
H3156G11	Mm.22584	Strap	serine/threonine kinase receptor associated protein	0.000121234	0.0049588
H3006F06	Mm.235407	Ube2v2	ubiquitin-conjugating enzyme E2 variant 2	0.000121461	0.00495602
H3098B01			EST	0.000121551	0.00494767
H3131A10	Mm.246304	Sypl	synaptophysin-like protein	0.000122872	0.00498936
H3096F10	Mm.29812	set-15	selenoprotein	0.000122982	0.00498181
H3092B08	Mm.17905	Rpia	ribose 5-phosphate isomerase A	0.000124104	0.00501519
H3016C10	Mm.296383	Hspca	heat shock protein 1, alpha	0.000126445	0.00509752
H3040C10			EST	0.000127139	0.00511322
H3095E12	Mm.29167	D2Ertd694e	DNA segment, Chr 2, ERATO Doi 694, expressed	0.000127663	0.00512204
H3095F11	Mm.285076	Dlat	dihydrolipoamide S-acetyltransferase (E2 component of pyruvate dehydrogenase complex)	0.000128028	0.00512445
H3099G08	Mm.11480	2810470K21Rik	RIKEN cDNA 2810470K21 gene	0.000128299	0.00512311
H3109F07	Mm.227583	Atp2a2	ATPase, Ca++ transporting, cardiac muscle, slow twitch 2	0.000128367	0.00511369
H3006H07	Mm.298092	Calm2	calmodulin 2	0.000128368	0.00510163
H3002F07	Mm.318085		Mus musculus transcribed sequences	0.000128741	0.00510439
H3035B03	Mm.258404	2610009I02Rik	RIKEN cDNA 2610009I02 gene	0.000129366	0.0051171
H3070A04	Mm.279817	Ep400	E1A binding protein p400	0.000129368	0.00510516
H3125H10	Mm.29722	Usmg5	upregulated during skeletal muscle growth 5	0.000129381	0.00509373
H3008D09	Mm.270382	2610311I19Rik	RIKEN cDNA 2610311I19 gene	0.000129818	0.00509901
H3147A07	Mm.216227	Csnk1d	casein kinase 1, delta	0.000130158	0.00510042
H3092E01	Mm.181973	1300014E15Rik	RIKEN cDNA 1300014E15 gene	0.000131367	0.00513583
H3132D01	Mm.268103	2610209L14Rik	RIKEN cDNA 2610209L14 gene	0.000132511	0.00516853
H3074C03	Mm.268185	2610510D13Rik	RIKEN cDNA 2610510D13 gene	0.000132738	0.00516543
H3159C03	Mm.124710	Pde4b	phosphodiesterase 4B, cAMP specific	0.000132979	0.00516285
H3129D09	Mm.57286	1700034P14Rik	RIKEN cDNA 1700034P14 gene	0.000134302	0.00520219
T160	Mm.248907	Map2k1	mitogen activated protein kinase kinase 1	0.000134603	0.00520186
T240	Mm.28262	Rgs2	regulator of G-protein signaling 2	0.000134617	0.00519046
H3150H05	Mm.210352	Silg41	silica-induced gene 41	0.000134974	0.00519233
H3153B12	Mm.28085	1700001A24Rik	RIKEN cDNA 1700001A24 gene	0.000135861	0.0052145
H3141E09	Mm.103116	2310047O13Rik	RIKEN cDNA 2310047O13 gene	0.000136389	0.00522288
H3053B07	Mm.1292	Th	tyrosine hydroxylase	0.000136421	0.00521221
H3129H09	Mm.124316	Tfpi	tissue factor pathway inhibitor	0.000136547	0.00520518
H3066A06	Mm.21965	D5Ertd593e	DNA segment, Chr 5, ERATO Doi 593, expressed	0.000137441	0.00522742
H3123C01	Mm.128733	D0H4S114	DNA segment, human D4S114	0.000137593	0.00522139
H3001H05	Mm.215667	Hspe1	heat shock protein 1 (chaperonin 10)	0.000138672	0.0052505
H3068B01	Mm.173633		Mus musculus transcribed sequences	0.000138957	0.00524946
P046	Mm.249695	Ppm1b	protein phosphatase 1B, magnesium dependent, beta isoform	0.000140279	0.00528751
H3013H06	Mm.63984	1500032H18Rik	RIKEN cDNA 1500032H18 gene	0.000140617	0.00528838
H3007H09	Mm.9916	1200008O12Rik	RIKEN cDNA 1200008O12 gene	0.000140733	0.00528094
H3119C01	Mm.29407	Vhlh	von Hippel-Lindau syndrome homolog	0.000142176	0.00532322
P331	Mm.88761	Tbx15	T-box 15	0.000142226	0.00531326
H3024D12	Mm.274926	Emb	embigin	0.00014276	0.00532137
H3098A12	Mm.30239	Slc39a8	solute carrier family 39 (metal ion transporter), member 8	0.00014291	0.00531516
T163	Mm.15918	Map3k1	mitogen activated protein kinase kinase kinase 1	0.000143569	0.00532789
H3130B11	Mm.5274	Sod1	superoxide dismutase 1, soluble	0.000145779	0.00539798
H3007E10	Mm.16831	Ckb	creatine kinase, brain	0.000146051	0.0053962
H3028E05	Mm.257615	1500002I11Rik	RIKEN cDNA 1500002I11 gene	0.000147928	0.00545354
H3118H12	Mm.143768	Fbxo3	F-box only protein 3	0.000149026	0.00548202
H3019C11	Mm.102752	C1galt1	core 1 UDP-galactose:N-acetylgalactosamine-alpha-R beta 1,3-galactosyltransferase	0.000150153	0.00551142
H3029F10	Mm.10530	Acadm	acetyl-Coenzyme A dehydrogenase, medium chain	0.000150589	0.00551535
H3102H03	Mm.250561	E430001P04Rik	RIKEN cDNA E430001P04 gene	0.000151303	0.00552948
H3130B07	Mm.268185	2610510D13Rik	RIKEN cDNA 2610510D13 gene	0.000151947	0.00554097
H3149G03	Mm.297562	Nono	non-POU-domain-containing, octamer binding protein	0.00015238	0.00554473
H3142C11	Mm.282863	Bpgm	2,3-bisphosphoglycerate mutase	0.000155972	0.00566318
H3053A12	Mm.28262	Rgs2	regulator of G-protein signaling 2	0.000156446	0.00566814
H3083H12	Mm.245715	Snap23	synaptosomal-associated protein 23	0.000156841	0.00567023
H3035H09	Mm.64579	2810036L13Rik	RIKEN cDNA 2810036L13 gene	0.000156845	0.00565818
H3057C01	Mm.168	Ifrd1	interferon-related developmental regulator 1	0.000158327	0.00569942
H3008F05	Mm.282700	Harsl	histidyl-tRNA synthetase-like	0.000158721	0.0057014
H3027B12	Mm.48795	2410018I08Rik	RIKEN cDNA 2410018I08 gene	0.000159312	0.00571043
H3084D02	Mm.211218	Rbm16	RNA binding motif protein 16	0.000159973	0.00572193
H3014B02	Mm.298115		Mus musculus transcribed sequence with moderate similarity to protein ref:NP_057223.1 (H.sapiens) 16.7Kd protein [Homo sapiens]	0.000160193	0.00571763
H3036E09			EST	0.000160466	0.00571526
H3147H01			EST	0.000161253	0.00573112
P369	Mm.268548	Max	Max protein	0.000164034	0.00581766
H3042D05	Mm.156651	Scap2	src family associated phosphoprotein 2	0.000165019	0.00584029
H3098C06	Mm.17551	4933434L15Rik	RIKEN cDNA 4933434L15 gene	0.000165341	0.00583937
H3075A10	Mm.173953	Smc6l1	SMC6 structural maintenance of chromosomes 6-like 1 (yeast)	0.000165512	0.00583316
H3123F03			EST	0.000166069	0.00584057
H3003E12	Mm.175403	Arl6ip2	ADP-ribosylation factor-like 6 interacting protein 2	0.0001662	0.00583298
H3140G08	Mm.257988	2610007K22Rik	RIKEN cDNA 2610007K22 gene	0.000166552	0.00583313
H3108G10	Mm.259026	2700078E11Rik	RIKEN cDNA 2700078E11 gene	0.000166569	0.0058216
H3032B05	Mm.289992	Eif3s6	eukaryotic translation initiation factor 3, subunit 6	0.00016691	0.00582142
H3072E09	Mm.256765	Nfkb1	nuclear factor of kappa light chain gene enhancer in B-cells 1, p105	0.000170166	0.0059227
H3124H07	Mm.270109	Nr2f2	nuclear receptor subfamily 2, group F, member 2	0.00017075	0.00593075
H3072A03	Mm.28753	1500010M16Rik	RIKEN cDNA 1500010M16 gene	0.000170946	0.00592532
H3130B06	Mm.267039		Mus musculus 0 day neonate cerebellum cDNA, RIKEN full-length enriched library, clone:C230091D08 product:unclassifiable, full insert sequence	0.00017213	0.00595406
H3019E05	Mm.4550	Atp1b1	ATPase, Na+/K+ transporting, beta 1 polypeptide	0.000172979	0.00597116
P799	Mm.3929	Zfhx1a	zinc finger homeobox 1a	0.000174248	0.00600263
P554	Mm.9474	Twist2	twist homolog 2 (Drosophila)	0.000174901	0.0060128
H3020F11	Mm.41271	Stard7	START domain containing 7	0.000176845	0.00606722
H3029C05	Mm.1893	1810004I06Rik	RIKEN cDNA 1810004I06 gene	0.000178124	0.00609866
H3031A03	Mm.297906	Fzd7	frizzled homolog 7 (Drosophila)	0.000178179	0.00608815
H3011H12	Mm.28765	Tram1	translocating chain-associating membrane protein 1	0.000180892	0.0061683
H3099G03	Mm.301303	2500002L14Rik	RIKEN cDNA 2500002L14 gene	0.000180941	0.0061575
H3029D10	Mm.244618	Ablim1	actin-binding LIM protein 1	0.000181302	0.00615731
H3011B01	Mm.210018	Plekhc1	pleckstrin homology domain containing, family C (with FERM domain) member 1	0.000182688	0.00619187
P338	Mm.4342	Tjp1	tight junction protein 1	0.000182788	0.00618281
H3104B08	Mm.218317	4930553M18Rik	RIKEN cDNA 4930553M18 gene	0.000183203	0.00618439
H3059A05	Mm.290830	Mad2l1	MAD2 (mitotic arrest deficient, homolog)-like 1 (yeast)	0.000183468	0.00618092
H3079F05	Mm.10702	Cacybp	calcyclin binding protein	0.000184648	0.00620825
H3137H08	Mm.290341	B230114J08Rik	RIKEN cDNA B230114J08 gene	0.000185201	0.0062144
H3052F01	Mm.297910		Mus musculus similar to DYRK2 protein (LOC380662), mRNA	0.000185242	0.0062034
H3130F07	Mm.297562	Nono	non-POU-domain-containing, octamer binding protein	0.000185661	0.00620507
H3079A01	Mm.196938	F830010I22Rik	RIKEN cDNA F830010I22 gene	0.000186136	0.00620859
H3069G07	Mm.27404	1110002A21Rik	RIKEN cDNA 1110002A21 gene	0.000186615	0.00621226
H3079A05	Mm.268926	Rnf141	ring finger protein 141	0.000189587	0.00629872
P635	Mm.3896	Dlx2	distal-less homeobox 2	0.000189649	0.00628833
H3012A03	Mm.297530	C820004H04Rik	RIKEN cDNA C820004H04 gene	0.000189744	0.0062791
H3105G07	Mm.237825	Bmpr1a	bone morphogenetic protein receptor, type 1A	0.00018993	0.0062729
H3140A09	Mm.18522	Cpt1a	carnitine palmitoyltransferase 1a, liver	0.000190098	0.00626616
H3108C06	Mm.25632	1810073G14Rik	RIKEN cDNA 1810073G14 gene	0.000190584	0.00626988
H3138B10	Mm.103080	Tex14	testis expressed gene 14	0.000191281	0.00628051
H3123H05	Mm.287450	Trp53bp2	transformation related protein 53 binding protein 2	0.000191375	0.00627135
H3147C11	Mm.21270		Mus musculus transcribed sequences	0.000191894	0.00627612
H3108E12	Mm.1639	Mcl1	myeloid cell leukemia sequence 1	0.000192715	0.00629076
H3011A01	Mm.277621	0610041P13Rik	RIKEN cDNA 0610041P13 gene	0.000193947	0.00631869
H3071A11	Mm.290530	AA409541	expressed sequence AA409541	0.000196846	0.00640072
H3032B09	Mm.248508	Mesdc2	mesoderm development candiate 2	0.000199597	0.00647766
H3013A12	Mm.165079	Crry	complement receptor related protein	0.000200348	0.00648952
H3019C06	Mm.182294	2310042G06Rik	RIKEN cDNA 2310042G06 gene	0.000200692	0.00648814
H3152C05	Mm.18957	6330442E10Rik	RIKEN cDNA 6330442E10 gene	0.000201495	0.00650159
H3132C11	Mm.20910	Cpd	carboxypeptidase D	0.000201553	0.00649102
H3091C09	Mm.206919	3732409C05Rik	RIKEN cDNA 3732409C05 gene	0.000201923	0.00649049
H3019D07	Mm.233889	2900042E17Rik	RIKEN cDNA 2900042E17 gene	0.000202732	0.00650407
H3009G04	Mm.14838	Rpl44	ribosomal protein L44	0.000203419	0.00651368
P183	Mm.298110	Eef1a1	eukaryotic translation elongation factor 1 alpha 1	0.000203446	0.00650215
H3007F09	Mm.298522	BC010304	cDNA sequence BC010304	0.000204158	0.00651251
H3081E04	Mm.272268	2310016L09Rik	RIKEN cDNA 2310016L09 gene	0.000204243	0.00650291
H3057B02			EST	0.000204533	0.00649982
H3136F06	Mm.290338	Prkx	putative serine/threonine kinase	0.000205387	0.00651464
H3008C11	Mm.268668	Melk	maternal embryonic leucine zipper kinase	0.000206004	0.00652191
H3074B03	Mm.170965	Arih1	ariadne ubiquitin-conjugating enzyme E2 binding protein homolog 1 (Drosophila)	0.000206447	0.00652364
H3105B10	Mm.260114	Ccnb1	cyclin B1	0.000207165	0.00653405
H3139D12	Mm.249479	Dncic2	dynein, cytoplasmic, intermediate chain 2	0.000208465	0.00656275
H3117H10			EST	0.000209397	0.00657978
P310	Mm.4660	Cxcl5	chemokine (C-X-C motif) ligand 5	0.000209512	0.00657109
H3086F01	Mm.28683	Trfr	transferrin receptor	0.000209756	0.00656648
P117	Mm.121265	Psma1	proteasome (prosome, macropain) subunit, alpha type 1	0.000210184	0.00656765
H3058H04	Mm.28890	2210023K21Rik	RIKEN cDNA 2210023K21 gene	0.000211713	0.00660318
H3152A07	Mm.102305	Tnrc6	trinucleotide repeat containing 6	0.000211812	0.00659403
H3140A04	Mm.9860	4833420G17Rik	RIKEN cDNA 4833420G17 gene	0.000211916	0.00658508
H3028H06	Mm.34411	D530020C15Rik	RIKEN cDNA D530020C15 gene	0.000211993	0.00657531
H3080B10	Mm.162185	1500041J02Rik	RIKEN cDNA 1500041J02 gene	0.000212111	0.00656685
H3020G01	Mm.24789	Gdpd1	glycerophosphodiester phosphodiesterase domain containing 1	0.000214811	0.00663823
H3077H08	Mm.274376	Rdh10	retinol dehydrogenase 10 (all-trans)	0.000214967	0.00663085
H3021H09	Mm.150701	1700017I17Rik	RIKEN cDNA 1700017I17 gene	0.000215032	0.00662071
H3089C04			EST	0.000215201	0.00661381
H3142B05	Mm.276041	3110003A17Rik	RIKEN cDNA 3110003A17 gene	0.000216169	0.00663142
H3151B11	Mm.181610	6330577E15Rik	RIKEN cDNA 6330577E15 gene	0.00021632	0.00662397
H3130D12	Mm.269815	Cd164	CD164 antigen	0.000220561	0.00674154
H3024H04	Mm.28811	D330037H05Rik	RIKEN cDNA D330037H05 gene	0.000220968	0.00674174
H3089H12	Mm.259330	F630045L20Rik	cDNA F630045L20 gene	0.000221529	0.00674659
H3029D02	Mm.182319	Usp14	ubiquitin specific protease 14	0.000221661	0.00673843
H3131E09	Mm.103262	AU021107	expressed sequence AU021107	0.000221912	0.00673386
H3030D08			EST	0.000222896	0.00675154
H3134E12	Mm.270703	Cast1	O-acetyltransferase	0.000223092	0.00674533
H3104G10	Mm.44142	E030025C11Rik	RIKEN cDNA E030025C11 gene	0.000223475	0.00674478
H3135A10	Mm.319259		Mus musculus transcribed sequence with moderate similarity to protein pir:S12207 (M.musculus) S12207 hypothetical protein (B2 element) - mouse	0.000224626	0.00676736
H3112G08	Mm.202747	Lats2	large tumor suppressor 2	0.000225784	0.00679008
P382	Mm.298213	Mod1	malic enzyme, supernatant	0.000227347	0.00682487
H3057H01	Mm.257371	BC010245	cDNA sequence BC010245	0.000228336	0.00684236
H3125H12	Mm.330489		Mus musculus transcribed sequence with strong similarity to protein sp:P10660 (H.sapiens) RS6_HUMAN 40S ribosomal protein S6 (Phosphoprotein NP33)	0.000228402	0.00683215
H3159E09	Mm.162025	Ulk2	Unc-51 like kinase 2 (C. elegans)	0.000228545	0.00682428
H3122B03	Mm.28127		Mus musculus transcribed sequence with moderate similarity to protein ref:NP_008975.1 (H.sapiens) katanin p60 subunit A 1 [Homo sapiens]	0.000229069	0.00682779
H3144H08	Mm.235906	Dmtf1	cyclin D binding myb-like transcription factor 1	0.000229465	0.00682749
H3081C06	Mm.256185	2810021O14Rik	RIKEN cDNA 2810021O14 gene	0.000230803	0.00685517
H3038D03	Mm.27184	D4Ertd89e	DNA segment, Chr 4, ERATO Doi 89, expressed	0.000230876	0.00684524
H3094B11	Mm.132272	Ap1s2	adaptor-related protein complex 1, sigma 2 subunit	0.000231532	0.00685262
H3109H03	Mm.21288	Ell2	elongation factor RNA polymerase II 2	0.000232469	0.00686827
H3051F07	Mm.277928	Tes3	testis derived transcript 3	0.000232724	0.00686374
T111	Mm.296169	Sqle	squalene epoxidase	0.000232825	0.00685467
H3068C04	Mm.298123		Mus musculus adult male kidney cDNA, RIKEN full-length enriched library, clone:0610042J09 product:fibroblast growth factor inducible 14, full insert sequence	0.000233307	0.00685687
H3023G03	Mm.21848	Bzw1	basic leucine zipper and W2 domains 1	0.000234286	0.00687361
H3136B02	Mm.22117	Polr2g	polymerase (RNA) II (DNA directed) polypeptide G	0.000234716	0.00687424
H3048C07			EST	0.000235136	0.00687454
H3003D09	Mm.289248	2610301I15Rik	RIKEN cDNA 2610301I15 gene	0.000235453	0.00687189
H3070F02	Mm.258094	B3gnt1	UDP-GlcNAc:betaGal beta-1,3-N-acetylglucosaminyltransferase 1	0.000236869	0.00690123
H3159C12	Mm.276271	Glg1	golgi apparatus protein 1	0.000237247	0.00690029
H3029G04	Mm.279985	Gemin6	gem (nuclear organelle) associated protein 6	0.000238423	0.00692251
H3013B02	Mm.249096	Atp6v1b2	ATPase, H+ transporting, V1 subunit B, isoform 2	0.000241129	0.00698901
H3151H11	Mm.271973	Ell	elongation factor RNA polymerase II	0.000241858	0.00699808
H3057A09	Mm.25467		Mus musculus transcribed sequences	0.000242035	0.00699116
H3026B12	Mm.255025	Pcaf	p300/CBP-associated factor	0.000242108	0.00698126
H3136C07	Mm.2159	Bnip3	BCL2/adenovirus E1B 19kDa-interacting protein 1, NIP3	0.000243194	0.00700059
H3036F12			EST	0.000243539	0.00699851
H3065B08	Mm.268926	Rnf141	ring finger protein 141	0.000243842	0.00699527
H3048B06	Mm.273905	Pscdbp	pleckstrin homology, Sec7 and coiled-coil domains, binding protein	0.000246191	0.00705063
H3015B11	Mm.227878	Rnmt	RNA (guanine-7-) methyltransferase	0.000247153	0.00706613
H3046H10	Mm.271160	Upf3b	UPF3 regulator of nonsense transcripts homolog B (yeast)	0.000248324	0.00708756
H3132E11	Mm.26040	2610207P08Rik	RIKEN cDNA 2610207P08 gene	0.000249367	0.00710527
T114	Mm.270109	Nr2f2	nuclear receptor subfamily 2, group F, member 2	0.000254147	0.00722922
H3155D07	Mm.257925	Hipk3	homeodomain interacting protein kinase 3	0.000254884	0.00723794
H3019E03	Mm.5088	Atm	ataxia telangiectasia mutated homolog (human)	0.000255823	0.00725234
H3094H01	Mm.83981	4933428L19Rik	RIKEN cDNA 4933428L19 gene	0.000258303	0.00731033
H3105B12	Mm.233534	Gnpnat1	glucosamine-phosphate N-acetyltransferase 1	0.000258534	0.00730456
H3099E02	Mm.9199	Pole2	polymerase (DNA directed), epsilon 2 (p59 subunit)	0.000259126	0.00730901
H3150H10	Mm.27432	Dnajb9	DnaJ (Hsp40) homolog, subfamily B, member 9	0.000259394	0.00730431
H3080G04	Mm.173451		Mus musculus transcribed sequence with weak similarity to protein pir:S12207 (M.musculus) S12207 hypothetical protein (B2 element) - mouse	0.000259936	0.00730732
P375	Mm.298212	Mitf	microphthalmia-associated transcription factor	0.000260561	0.00731268
H3135A07	Mm.257377	Cryzl1	crystallin, zeta (quinone reductase)-like 1	0.000260782	0.00730669
H3050H08	Mm.260106	BC031748	cDNA sequence BC031748	0.000261748	0.00732153
H3124G07	Mm.284252	Tdg	thymine DNA glycosylase	0.000263538	0.00735936
H3011A10	Mm.24627	4833432B22Rik	RIKEN cDNA 4833432B22 gene	0.00026474	0.00738067
H3100G07	Mm.280544	Ddx52	DEAD (Asp-Glu-Ala-Asp) box polypeptide 52	0.000267584	0.00744762
T101	Mm.299547	Idi1	isopentenyl-diphosphate delta isomerase	0.000268163	0.00745139
H3065C08	Mm.274432	Ppp3cb	protein phosphatase 3, catalytic subunit, beta isoform	0.000268519	0.00744896
H3076F07	Mm.235300	Lin7c	lin 7 homolog c (C. elegans)	0.000269332	0.00745921
H3090B10	Mm.158726	AF013969	expressed sequence AF013969	0.000269501	0.0074516
H3084C01	Mm.6765	Siah1a	seven in absentia 1A	0.000271038	0.0074818
H3103A05	Mm.4186	Pla2g4a	phospholipase A2, group IVA (cytosolic, calcium-dependent)	0.000271105	0.00747139
H3026B01	Mm.244820	Tbp	TATA box binding protein	0.000271591	0.00747254
H3141F05	Mm.22701	Gas1	growth arrest specific 1	0.00027188	0.00746825
H3120D11	Mm.285922	Hnrph2	heterogeneous nuclear ribonucleoprotein H2	0.000272418	0.00747083
H3014C05	Mm.37787	1700055P21Rik	RIKEN cDNA 1700055P21 gene	0.000272983	0.00747413
H3074D12	Mm.26124		Mus musculus transcribed sequence with weak similarity to protein sp:P18621 (H.sapiens) RL17_HUMAN 60S ribosomal protein L17 (L23)	0.000273287	0.0074703
H3109D12	Mm.86004	Kctd4	potassium channel tetramerisation domain containing 4	0.000275027	0.00750564
H3019D08	Mm.264435	Ero1l	ERO1-like (S. cerevisiae)	0.000275239	0.00749925
H3057C09	Mm.45539	1700034M03Rik	RIKEN cDNA 1700034M03 gene	0.000276817	0.00753005
H3100C06	Mm.289248	2610301I15Rik	RIKEN cDNA 2610301I15 gene	0.0002782	0.00755545
H3120A02	Mm.292016	Sfrs7	splicing factor, arginine/serine-rich 7	0.000279728	0.0075847
T063	Mm.259884	Mut	methylmalonyl-Coenzyme A mutase	0.000280387	0.00759031
H3105A01	Mm.38370	Pip5k3	phosphatidylinositol-3-phosphate/phosphatidylinositol 5-kinase, type III	0.000280422	0.00757905
H3140G05			EST	0.000280701	0.00757442
H3082B04	Mm.19669	Pfkfb3	6-phosphofructo-2-kinase/fructose-2,6-biphosphatase 3	0.000281092	0.00757282
H3067A05	Mm.208955	BC031353	cDNA sequence BC031353	0.000281875	0.00758177
H3076C12	Mm.143689	Facl4	fatty acid-Coenzyme A ligase, long chain 4	0.000283262	0.00760688
H3019F08	Mm.158801	Rod1	ROD1 regulator of differentiation 1 (S. pombe)	0.000283477	0.00760053
P393	Mm.6680	Catnd2	catenin delta 2	0.000283654	0.00759318
H3147H06	Mm.10702	Cacybp	calcyclin binding protein	0.000284846	0.00761295
H3082E03	Mm.240434	Pdcd8	programmed cell death 8	0.000285531	0.00761914
H3120H05	Mm.158231	Sdha	succinate dehydrogenase complex, subunit A, flavoprotein (Fp)	0.000285916	0.00761734
H3008H01	Mm.248360	Anxa1	annexin A1	0.000287201	0.00763945
H3003G12	Mm.31198		Mus musculus adult male epididymis cDNA, RIKEN full-length enriched library, clone:9230108P05 product:unknown EST, full insert sequence	0.000288254	0.00765536
H3141E10	Mm.279781	2310047G20Rik	RIKEN cDNA 2310047G20 gene	0.000288291	0.00764425
H3076F09	Mm.259045	Actr2	ARP2 actin-related protein 2 homolog (yeast)	0.000288646	0.00764162
H3091E07	Mm.180052	Ube2d2	ubiquitin-conjugating enzyme E2D 2	0.000289175	0.00764359
H3015F09	Mm.155896	Hnrpa2b1	heterogeneous nuclear ribonucleoprotein A2/B1	0.000290511	0.00766684
H3023E07	Mm.275281	Narg1	NMDA receptor-regulated gene 1	0.000292686	0.00771215
H3120E05	Mm.28484	Tm4sf8	transmembrane 4 superfamily member 8	0.000298672	0.00785756
H3020B11	Mm.281517	5730598B06	hypothetical protein 5730598B06	0.000299157	0.00785802
H3140A11			EST	0.000299575	0.00785671
H3012C02	Mm.248827	Canx	calnexin	0.00030003	0.00785641
H3108A09	Mm.146901	B230307C21	hypothetical protein B230307C21	0.000300367	0.00785298
H3037H05	Mm.279693	Dpm1	dolichol-phosphate (beta-D) mannosyltransferase 1	0.000300642	0.00784797
H3009G03	Mm.183042	Impa1	inositol (myo)-1(or 4)-monophosphatase 1	0.000301228	0.00785107
H3097F03	Mm.227202	2310058J06Rik	RIKEN cDNA 2310058J06 gene	0.000301229	0.00783895
H3062C05	Mm.168523	Calmbp1	calmodulin binding protein 1	0.000301703	0.00783915
H3112H12	Mm.254144	Adrbk1	adrenergic receptor kinase, beta 1	0.000304	0.00788665
H3101D04	Mm.6461	Hrb	HIV-1 Rev binding protein	0.000304412	0.00788516
T150	Mm.4848	Fyn	Fyn proto-oncogene	0.000307523	0.0079535
H3069F06	Mm.210996	A930014I12Rik	RIKEN cDNA A930014I12 gene	0.000308193	0.00795857
H3054B08	Mm.58882	Inpp5f	inositol polyphosphate-5-phosphatase F	0.000308648	0.00795809
H3075C05	Mm.275013	Eif5	eukaryotic translation initiation factor 5	0.000309232	0.00796096
H3031G05	Mm.272533	Gtf2h2	general transcription factor II H, polypeptide 2	0.000309571	0.00795748
H3133F07	Mm.229287	B130017I01Rik	RIKEN cDNA B130017I01 gene	0.000310502	0.00796923
H3101D02	Mm.22108	1700029A22Rik	RIKEN cDNA 1700029A22 gene	0.000311465	0.00798177
H3025F02	Mm.27651	BC030932	cDNA sequence BC030932	0.000311956	0.00798217
H3083A03	Mm.27196	1700029F09Rik	RIKEN cDNA 1700029F09 gene	0.000312277	0.00797825
H3139F07	Mm.256301	2410066K11Rik	RIKEN cDNA 2410066K11 gene	0.000313109	0.00798736
H3095E03	Mm.66601	9130023F12Rik	RIKEN cDNA 9130023F12 gene	0.00031464	0.00801426
H3104A07	Mm.1963	Srrm1	serine/arginine repetitive matrix 1	0.000314966	0.00801043
H3003B09	Mm.205421	F730017H24Rik	RIKEN cDNA F730017H24 gene	0.000319575	0.00811537
P514	Mm.676	Atf1	activating transcription factor 1	0.000322111	0.00816743
H3099D09	Mm.19073	Map4k4	mitogen-activated protein kinase kinase kinase kinase 4	0.000323554	0.00819166
H3109B09	Mm.41758	Jam2	junction adhesion molecule 2	0.00032393	0.00818886
H3154B01	Mm.304895		Mus musculus transcribed sequence with weak similarity to protein ref:NP_081764.1 (M.musculus) RIKEN cDNA 5730493B19 [Mus musculus]	0.00032396	0.00817732
H3121H07	Mm.73777	2810405I11Rik	RIKEN cDNA 2810405I11 gene	0.000325112	0.00819409
H3048F12	Mm.241109	Rsn	restin (Reed-Steinberg cell-expressed intermediate filament-associated protein)	0.000326013	0.0082045
H3136B07	Mm.6343	Npm1	nucleophosmin 1	0.00032675	0.00821075
H3027F06	Mm.18230	1300007B12Rik	RIKEN cDNA 1300007B12 gene	0.000327651	0.0082211
H3085D03	Mm.244900	Pde7a	phosphodiesterase 7A	0.000329827	0.00826337
H3096D02	Mm.112333	6030410K14	hypothetical protein 6030410K14	0.000330451	0.0082667
H3049G04	Mm.239141	Bcl10	B-cell leukemia/lymphoma 10	0.000330663	0.00825968
H3024E06	Mm.24685	B230114H05Rik	RIKEN cDNA B230114H05 gene	0.000330851	0.00825213
H3124B03	Mm.12848	4930511A21Rik	RIKEN cDNA 4930511A21 gene	0.000331041	0.00824465
H3007D10	Mm.274360	Rnf13	ring finger protein 13	0.000333938	0.0083045
H3123H02	Mm.251639	4833415N24Rik	RIKEN cDNA 4833415N24 gene	0.000333954	0.00829262
H3007D12	Mm.260403		Mus musculus nuclear cap binding protein subunit 1, 80kDa, mRNA (cDNA clone IMAGE:6402922)	0.00033518	0.00831078
H3017B07	Mm.286066	Supt16h	suppressor of Ty 16 homolog (S. cerevisiae)	0.00033673	0.00833691
H3063F04	Mm.244403	LOC212285	hypothetical protein LOC212285	0.000337027	0.00833201
H3137B03	Mm.23551	BC016265	cDNA sequence BC016265	0.00033721	0.00832429
H3124H06	Mm.236868	Rps3	ribosomal protein S3	0.000338382	0.00834097
H3140C06	Mm.206008	BC027246	cDNA sequence BC027246	0.000339312	0.00835164
H3012D04	Mm.122366	4833420I20Rik	RIKEN cDNA 4833420I20 gene	0.000340454	0.00836751
H3023A02	Mm.10508	Ssb	Sjogren syndrome antigen B	0.000341734	0.00838669
H3089F08	Mm.262707	0610013E23Rik	RIKEN cDNA 0610013E23 gene	0.000342166	0.00838507
H3039E11	Mm.5697		Mus musculus 0 day neonate lung cDNA, RIKEN full-length enriched library, clone:E030006G18 product:unknown EST, full insert sequence	0.000343136	0.00839658
H3146D02	Mm.38877	9630015D15Rik	RIKEN cDNA 9630015D15 gene	0.00034668	0.00847099
H3130B02	Mm.209281	Eif4e	eukaryotic translation initiation factor 4E	0.000346971	0.00846579
H3013A01	Mm.281885	Slc35a1	solute carrier family 35 (CMP-sialic acid transporter), member 1	0.000347482	0.00846596
H3153B04	Mm.298688		Mus musculus transcribed sequence with strong similarity to protein pir:B35047 (H.sapiens) B35047 zinc finger protein ZFX - human	0.000350945	0.00853797
H3023B08	Mm.310495		Mus musculus transcribed sequences	0.000351767	0.0085456
H3101F06	Mm.34701	Pum1	pumilio 1 (Drosophila)	0.000352767	0.00855752
H3110G04	Mm.268921	Pldn	pallidin	0.000354334	0.00858316
H3105G02	Mm.281018	2410003K15Rik	RIKEN cDNA 2410003K15 gene	0.00035514	0.0085903
H3049H05	Mm.100068	Amot	angiomotin	0.000358179	0.00865136
H3076B03	Mm.247837	AW559096	expressed sequence AW559096	0.000358706	0.00865165
H3119G10	Mm.181610	6330577E15Rik	RIKEN cDNA 6330577E15 gene	0.000362181	0.00872295
H3018H09	Mm.23692	Csnk2a1	casein kinase II, alpha 1 polypeptide	0.000363357	0.00873877
H3136C08			EST	0.000363517	0.00873012
H3096F08	Mm.300508		Mus musculus transcribed sequence with strong similarity to protein ref:NP_057388.1 (H.sapiens) ribosomal protein L24-like; my024 protein [Homo sapiens]	0.000364784	0.00874804
H3012H01	Mm.21500	Mib1	mindbomb homolog 1 (Drosophila)	0.000365353	0.0087492
H3049H03	Mm.11311	2310057D15Rik	RIKEN cDNA 2310057D15 gene	0.000365618	0.0087431
H3100B03			EST	0.000365923	0.00873797
H3085E01	Mm.31012	D130064H19Rik	RIKEN cDNA D130064H19 gene	0.00036736	0.00875984
H3030H04			EST	0.000367665	0.00875469
H3120G04	Mm.2756	Hmgn1	high mobility group nucleosomal binding domain 1	0.000369553	0.00878722
H3023F09	Mm.296119	Gnpda1	glucosamine-6-phosphate deaminase 1	0.00037008	0.00878731
P838	Mm.256975	Nras	neuroblastoma ras oncogene	0.000370601	0.00878726
H3032B04	Mm.291037	Prei3	preimplantation protein 3	0.000374871	0.00887599
P451	Mm.22701	Gas1	growth arrest specific 1	0.000375019	0.00886701
H3056D12	Mm.297292	Icam1	intercellular adhesion molecule	0.00037578	0.00887252
P669	Mm.25760	Prdc	protein related to DAN and cerberus	0.000379138	0.00893926
H3148D07	Mm.276300		Mus musculus 2 days neonate thymus thymic cells cDNA, RIKEN full-length enriched library, clone:E430008K23 product:unknown EST, full insert sequence	0.000379545	0.00893631
H3027C12	Mm.1761	Clk	CDC-like kinase	0.000380692	0.00895079
H3149E03	Mm.59812	1200009B18Rik	RIKEN cDNA 1200009B18 gene	0.000382065	0.00897052
H3131C04	Mm.34012	5730469D23Rik	RIKEN cDNA 5730469D23 gene	0.000382804	0.00897533
H3129E04	Mm.296945	Btbd1	BTB (POZ) domain containing 1	0.000383659	0.00898286
H3115G03	Mm.24805	Uqcrb	ubiquinol-cytochrome c reductase binding protein	0.000384236	0.00898386
H3159A05			EST	0.000384711	0.00898248
H3143F04	Mm.24643	Cetn2	centrin 2	0.000384931	0.00897515
P005	Mm.12239	Gmnn	geminin	0.000385031	0.00896503
H3004D01	Mm.29927		Mus musculus transcribed sequence with moderate similarity to protein ref:NP_081764.1 (M.musculus) RIKEN cDNA 5730493B19 [Mus musculus]	0.000387517	0.00901045
H3023A11			EST	0.00038861	0.00902338
H3124F07	Mm.275304	Rab22	RAB22, member RAS oncogene family	0.000390593	0.00905691
H3103F03	Mm.249695	Ppm1b	protein phosphatase 1B, magnesium dependent, beta isoform	0.000393285	0.00910677
H3018H12	Mm.27143	Neto2	neuropilin (NRP) and tolloid (TLL)-like 2	0.000394902	0.00913164
H3140B10	Mm.13148	1110064P04Rik	RIKEN cDNA 1110064P04 gene	0.000396298	0.00915133
P854	Mm.18675	Hprt	hypoxanthine guanine phosphoribosyl transferase	0.00039771	0.00917134
H3025G02	Mm.6787	Sfrs3	splicing factor, arginine/serine-rich 3 (SRp20)	0.000399147	0.00919187
H3090A04	Mm.327466		Mus musculus 12 days embryo male wolffian duct includes surrounding region cDNA, RIKEN full-length enriched library, clone:6720407O05 product:unknown EST, full insert sequence	0.000399352	0.00918401
H3018F03	Mm.267353	1300004G08Rik	RIKEN cDNA 1300004G08 gene	0.000402922	0.00925344
H3069F07	Mm.201455	Scamp1	secretory carrier membrane protein 1	0.000403184	0.00924683
H3119H10	Mm.155364	5033428A16Rik	RIKEN cDNA 5033428A16 gene	0.000405253	0.00928162
H3096G08	Mm.260521	Pik3ca	phosphatidylinositol 3-kinase, catalytic, alpha polypeptide	0.000405471	0.00927398
H3056F03	Mm.243797	4930579A11Rik	RIKEN cDNA 4930579A11 gene	0.000407951	0.00931803
H3119B12	Mm.304981		Mus musculus transcribed sequences	0.000408703	0.00932253
H3138G04	Mm.41746	Rpo2tc1	RNA polymerase II transcriptional coactivator	0.000409201	0.00932124
H3095B10	Mm.27120	LOC228071	hypothetical protein LOC228071	0.000410366	0.00933514
H3115F02	Mm.272938	Pnpt1	polyribonucleotide nucleotidyltransferase 1	0.000411906	0.0093575
H3122B05	Mm.132457	C130032J12Rik	RIKEN cDNA C130032J12 gene	0.000413995	0.00939227
H3131D01	Mm.299021	9930021J03Rik	RIKEN cDNA 9930021J03 gene	0.000419482	0.00950392
H3123C12			EST	0.000419513	0.00949183
H3093E01	Mm.192580	Rtn4	reticulon 4	0.000419975	0.00948952
H3001D02	Mm.12559	Hs3st1	heparan sulfate (glucosamine) 3-O-sulfotransferase 1	0.000420184	0.00948148
H3103C03	Mm.33919	C330023M02Rik	RIKEN cDNA C330023M02 gene	0.000420747	0.00948147
H3017F06	Mm.196581	Mapk1	mitogen activated protein kinase 1	0.000421063	0.0094759
H3152D10	Mm.293771	2410018D16Rik	RIKEN cDNA 2410018D16 gene	0.000421315	0.0094689
H3067D09	Mm.27716	4932439K10Rik	RIKEN cDNA 4932439K10 gene	0.000421466	0.00945964
H3127B05			EST	0.000421525	0.00944834
H3157E06	Mm.29504	Ssfa1	sperm specific antigen 1	0.000422803	0.00946436
H3049E03	Mm.266312	Zrf2	zuotin related factor 2	0.000423742	0.00947278
H3132B02	Mm.240490	1200009K13Rik	RIKEN cDNA 1200009K13 gene	0.00042468	0.00948114
H3085B12	Mm.289914	D1Ertd396e	DNA segment, Chr 1, ERATO Doi 396, expressed	0.000426726	0.00951417
H3059E02	Mm.32020	Hrmt1l1	heterogeneous nuclear ribonucleoprotein methyltransferase-like 1 (S. cerevisiae)	0.000427398	0.00951654
H3124H02	Mm.25228	Rnf11	ring finger protein 11	0.000427685	0.00951034
H3022G03	Mm.2462	Psmc2	proteasome (prosome, macropain) 26S subunit, ATPase 2	0.000428632	0.0095188
H3079B10	Mm.28904	BC023106	cDNA sequence BC023106	0.000431779	0.00957605
H3135E03	Mm.306638		Mus musculus transcribed sequences	0.00043812	0.00970386
H3083H08	Mm.291792	1500004O14Rik	RIKEN cDNA 1500004O14 gene	0.000438406	0.00969743
H3136H11	Mm.321048	Map4k5	mitogen-activated protein kinase kinase kinase kinase 5	0.000438574	0.00968839
H3032C07	Mm.237670	Appbp1	amyloid beta precursor protein binding protein 1	0.000439086	0.00968698
H3112G10	Mm.240830	Dab2	disabled homolog 2 (Drosophila)	0.000440291	0.00970082
H3071G09	Mm.289637		Mus musculus 0 day neonate cerebellum cDNA, RIKEN full-length enriched library, clone:C230006L13 product:similar to BA207C16.2 (NOVEL PROTEIN SIMILAR TO C. ELEGANS R06F6.8 (SW:Q09417) (CONTAINS KIAA1432)) (FRAGMENT) [Homo sapiens], full insert sequence	0.000444135	0.00977271
H3040H05			EST	0.000448448	0.00985472
H3158C08	Mm.2454	Sh3d19	SH3 domain protein D19	0.000448619	0.00984561
H3144B12	Mm.276007	Ern1	endoplasmic reticulum (ER) to nucleus signalling 1	0.000449575	0.00985372
H3013A11	Mm.38370	Pip5k3	phosphatidylinositol-3-phosphate/phosphatidylinositol 5-kinase, type III	0.00045049	0.00986091
H3106E07	Mm.216525	C630029K18Rik	RIKEN cDNA C630029K18 gene	0.00045105	0.00986033
P307	Mm.2416	Scin	scinderin	0.000451445	0.00985616
H3122C09	Mm.35006		Mus musculus 8 days embryo whole body cDNA, RIKEN full-length enriched library, clone:5730530J16 product:inferred: RIKEN cDNA 5730530J16 gene, full insert sequence	0.000451871	0.00985265
H3132E05	Mm.10141	Atrx	alpha thalassemia/mental retardation syndrome X-linked homolog (human)	0.000453054	0.00986566
H3132C10	Mm.256975	Nras	neuroblastoma ras oncogene	0.000454177	0.00987732
H3001E02	Mm.202774	Rbm9	RNA binding motif protein 9	0.000454825	0.00987863
H3107E04	Mm.1405	Wbp2	WW domain binding protein 2	0.000457533	0.00992464
H3039D05	Mm.172689		Mus musculus transcribed sequence with weak similarity to protein ref:NP_570953.1 (M.musculus) CAMP [Mus musculus]	0.000458584	0.00993461
H3043C01	Mm.290677		Mus musculus similar to Probable cation-transporting ATPase 3 (ATPase family homolog up-regulated in senescence cells 1) (LOC224087), mRNA	0.000459894	0.00995017
H3120C03	Mm.269025	2810417H13Rik	RIKEN cDNA 2810417H13 gene	0.000460122	0.0099423
H3049H11	Mm.182053	Ubqln1	ubiquilin 1	0.000463232	0.00999666

[truncated: 8 more sheets: es72_up_fdr10, es72_down_fdr10, es48_up_fdr20, es48_down_fdr20, es24_up_fdr20, es24_down_fdr20, Gene Ontology, Gene Ontology Prevalence]
